# Supplementary material for: Transition-metal free alkylarylation of acrylamides initiated by radical C–C bond cleavage of the tertiary cycloalkanols
Source: Royal Society of Chemistry journal article supplement (doi:10.1039/c6ra03431d), 2016-01-01

## Supporting Information

### **Transition-metal free alkylarylation of acrylamides initiated by radical C–C bond cleavage of the tertiary cycloalkanols**

Li-Na Guo,<sup>\*a</sup> Zhi-Qiang Deng,<sup>a</sup> Yong Wu<sup>a</sup> and Jie Hu<sup>b</sup>

*<sup>a</sup>Department of Chemistry, School of Science and MOE Key Laboratory for Nonequilibrium Synthesis and Modulation of Condensed Matter, Xi'an Jiaotong University, Xi'an 710049, China*

*<sup>b</sup>Xi'an Libang Pharmaceutical Co., LTD*

E-mail: guoln81@xjtu.edu.cn

#### **Table of Contents**

|                                                                                           |            |
|-------------------------------------------------------------------------------------------|------------|
| General Information                                                                       | <b>S2</b>  |
| Starting Materials                                                                        | <b>S2</b>  |
| General Procedure for the Cyclization of Acrylamides with Tertiary Cyclopropanols         | <b>S3</b>  |
| Characterization of Products <b>3</b>                                                     | <b>S4</b>  |
| Characterization of Products <b>4</b>                                                     | <b>S9</b>  |
| General Procedure for the Cyclization of Acrylamide <b>1a</b> with Tertiary Cyclobutanols | <b>S15</b> |
| Characterization of Products <b>6</b>                                                     | <b>S16</b> |
| Investigation of the Reaction Mechanism                                                   | <b>S18</b> |
| References                                                                                | <b>S21</b> |
| <sup>1</sup> H NMR and <sup>13</sup> C NMR Spectra of Products <b>3</b>                   | <b>S22</b> |
| <sup>1</sup> H NMR and <sup>13</sup> C NMR Spectra of Products <b>4</b>                   | <b>S34</b> |
| <sup>1</sup> H NMR and <sup>13</sup> C NMR Spectra of Products <b>6</b>                   | <b>S49</b> |

## General Information

All reactions were carried out in Schlenk-tubes filled with nitrogen. Column chromatography was carried out on silica gel.  $^1\text{H}$  NMR and  $^{13}\text{C}$  NMR spectra were recorded on a Bruker Advance III-400 in solvents as indicated. Chemical shift are reported in ppm from TMS with the solvent resonance as internal standard ( $\text{CDCl}_3$ :  $^1\text{H}$ -NMR:  $\delta = 7.26$ ;  $^{13}\text{C}$ -NMR:  $\delta = 77.0$ ). IR spectra were recorded on a Bruker Tensor 27 spectrometer and only major peaks are reported in  $\text{cm}^{-1}$ . HRMS were obtained on a Q-TOF micro spectrometer. Melting points were measured on a microscopic apparatus and are uncorrected.

## Starting Materials

All of acrylamides **1** were synthesized according to the literature, and the NMR spectroscopies were in full accordance with the data in the literature.<sup>1</sup> Tertiary cyclopropanols **4** were prepared by the addition of Grignard reagent to the precursor esters according to the reported procedure.<sup>2</sup> Tertiary cyclobutanols were prepared by the addition of Grignard reagent to cyclobutanone according to the reported procedure.<sup>3</sup> All of the NMR spectroscopy were in full accordance with the data in the literatures.

## General Procedure for the Cyclization of Acrylamides with Cyclopropanols

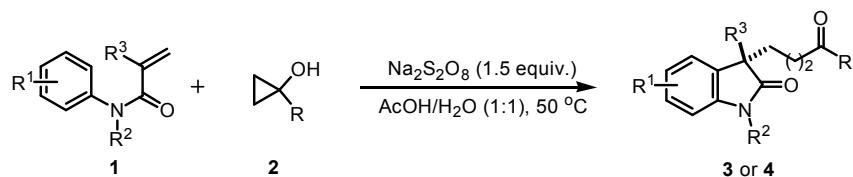

Acrylamides **1** (0.2 mmol, 1.0 equiv), and Na<sub>2</sub>S<sub>2</sub>O<sub>8</sub> (71.4 mg, 1.5 equiv) were added into an oven-dried Schlenk-tube. The tube was evacuated and backfilled with nitrogen (3 times). Then, a solution of tertiary cyclopropanols **2** (0.3 mmol, 1.5 equiv) in HOAc/H<sub>2</sub>O (1:1, 2 mL) was injected into the tube by syringe. The tube was then sealed with a Teflon lined cap and the mixture was stirred at 50 °C for 24 h. The resulting mixture was diluted with EtOAc, and the organic phase was washed successively with H<sub>2</sub>O, NaHCO<sub>3</sub> (3 times) and brine then dried over Na<sub>2</sub>SO<sub>4</sub> and concentrated in vacuo. The residue was purified by column chromatography on silica gel (gradient eluent of EtOAc/petroleum ether: 1/10 to 1/5) to give the corresponding products **3** and **4** in yields listed in Table 2 and Table 3.

### Characterization of Products 3

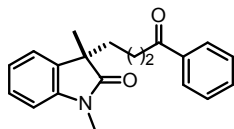

**3a:** Colorless liquid (82%, 50.3 mg);  $R_f$  0.25 (EtOAc/petroleum ether = 1:5);  $^1\text{H}$  NMR (400 MHz,  $\text{CDCl}_3$ ):  $\delta$  = 7.85 (d,  $J$  = 7.6 Hz, 2H), 7.52 (t,  $J$  = 7.6 Hz, 1H), 7.42 (t,  $J$  = 7.6 Hz, 2H), 7.26 (t,  $J$  = 7.6 Hz, 1H), 7.21 (d,  $J$  = 7.2 Hz, 1H), 7.07 (t,  $J$  = 7.2 Hz, 1H), 6.84 (d,  $J$  = 7.6 Hz, 1H), 3.22 (s, 3H), 2.90-2.77 (m, 2H), 2.01-1.84 (m, 2H), 1.43-1.34 (m, 5H);  $^{13}\text{C}$  NMR (100 MHz,  $\text{CDCl}_3$ ):  $\delta$  = 199.5, 180.6, 143.2, 136.8, 133.7, 132.9, 128.5, 127.9, 127.8, 122.6, 108.0, 48.4, 38.3, 37.8, 26.2, 23.9, 19.2 ppm; IR (KBr):  $\nu_{\text{max}}$  1711, 1608, 1460, 1346, 1246  $\text{cm}^{-1}$ ; HRMS (ESI) calcd for  $\text{C}_{20}\text{H}_{21}\text{NNaO}_2$   $[\text{M}+\text{Na}]^+$  330.1464, found 330.1460.

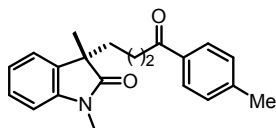

**3b:** Pale yellow liquid (80%, 51.4 mg);  $R_f$  0.25 (EtOAc/petroleum ether = 1:5);  $^1\text{H}$  NMR (400 MHz,  $\text{CDCl}_3$ ):  $\delta$  = 7.75 (d,  $J$  = 8.0 Hz, 2H), 7.27-7.19 (m, 4H), 7.06 (t,  $J$  = 7.6 Hz, 1H), 6.84 (d,  $J$  = 7.6 Hz, 1H), 3.21 (s, 3H), 2.89-2.74 (m, 2H), 2.38 (s, 3H), 2.00-1.84 (m, 2H), 1.42-1.36 (m, 5H);  $^{13}\text{C}$  NMR (100 MHz,  $\text{CDCl}_3$ ):  $\delta$  = 199.2, 180.5, 143.6, 143.2, 134.3, 133.7, 129.1, 128.0, 127.7, 122.6, 122.5, 108.0, 48.3, 38.2, 37.8, 26.1, 23.9, 21.5, 19.3 ppm; IR (KBr):  $\nu_{\text{max}}$  1712, 1610, 1462, 1347, 1256  $\text{cm}^{-1}$ ; HRMS (ESI) calcd for  $\text{C}_{21}\text{H}_{23}\text{NNaO}_2$   $[\text{M}+\text{Na}]^+$  344.1621, found 344.1615.

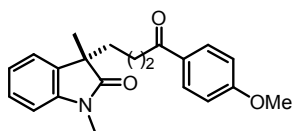

**3c:** Pale yellow liquid (70%, 47.2 mg);  $R_f$  0.3 (EtOAc/petroleum ether = 1:2);  $^1\text{H}$  NMR (400 MHz,  $\text{CDCl}_3$ ):  $\delta$  = 7.85-7.82 (m, 2H), 7.27-7.19 (m, 2H), 7.06 (t,  $J$  = 7.6 Hz, 1H), 6.90-6.86 (m, 2H), 6.84 (d,  $J$  = 7.6 Hz, 1H), 3.84 (s, 3H), 3.21 (s, 3H), 2.86-2.71 (m, 2H), 2.00-1.83 (m, 2H), 1.41-1.32 (m, 5H);  $^{13}\text{C}$  NMR (100 MHz,  $\text{CDCl}_3$ ):  $\delta$  = 198.1, 180.6, 163.3, 143.2, 133.7, 130.1, 129.9, 127.7, 122.6, 122.5, 113.6, 108.0,

55.4, 48.4, 38.0, 37.8, 26.1, 23.9, 19.4 ppm; IR (KBr):  $\nu_{\max}$  1711, 1604, 1462, 1347, 1254, 1172  $\text{cm}^{-1}$ ; HRMS (ESI) calcd for  $\text{C}_{21}\text{H}_{23}\text{NNaO}_3$   $[\text{M}+\text{Na}]^+$  360.1570, found 360.1561.

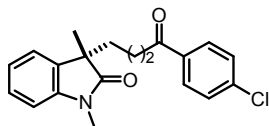

**3d:** Colorless liquid (73%, 49.8 mg);  $R_f$  0.25 (EtOAc/petroleum ether = 1:5);  $^1\text{H}$  NMR (400 MHz,  $\text{CDCl}_3$ ):  $\delta$  = 7.77 (d,  $J$  = 8.8 Hz, 2H), 7.37 (d,  $J$  = 8.4 Hz, 2H), 7.27-7.23 (m, 1H), 7.19 (d,  $J$  = 7.2 Hz, 1H), 7.05 (t,  $J$  = 7.6 Hz, 1H), 6.84 (d,  $J$  = 7.6 Hz, 1H), 3.21 (s, 3H), 2.87-2.72 (m, 2H), 1.99-1.82 (m, 2H), 1.41-1.31 (m, 5H);  $^{13}\text{C}$  NMR (100 MHz,  $\text{CDCl}_3$ ):  $\delta$  = 198.2, 180.4, 143.2, 139.3, 135.0, 133.6, 129.3, 128.8, 127.8, 122.5, 108.0, 48.3, 38.3, 37.6, 26.1, 23.9, 19.1 ppm; IR (KBr):  $\nu_{\max}$  1711, 1611, 1464, 1347, 1247  $\text{cm}^{-1}$ ; HRMS (ESI) calcd for  $\text{C}_{20}\text{H}_{20}\text{ClKNO}_2$   $[\text{M}+\text{K}]^+$  380.0814, found 380.0806.

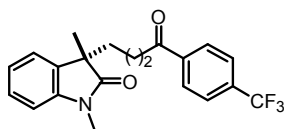

**3e:** Colorless liquid (54%, 40.5 mg);  $R_f$  0.25 (EtOAc/petroleum ether = 1:5);  $^1\text{H}$  NMR (400 MHz,  $\text{CDCl}_3$ ):  $\delta$  = 7.94 (d,  $J$  = 8.4 Hz, 2H), 7.68 (d,  $J$  = 8.4 Hz, 2H), 7.26 (t,  $J$  = 8.0 Hz, 1H), 7.20 (d,  $J$  = 6.8 Hz, 1H), 7.06 (t,  $J$  = 7.6 Hz, 1H), 6.85 (d,  $J$  = 7.6 Hz, 1H), 3.22 (s, 3H), 2.93-2.79 (m, 2H), 2.02-1.84 (m, 2H), 1.44-1.33 (m, 5H);  $^{13}\text{C}$  NMR (100 MHz,  $\text{CDCl}_3$ ):  $\delta$  = 198.5, 180.4, 143.2, 139.4, 134.2 (q,  $J$  = 32.5 Hz), 128.2, 127.8, 125.6 (q,  $J$  = 3.6 Hz), 123.5 (q,  $J$  = 271.2 Hz), 122.6, 122.5, 108.1, 48.3, 38.6, 37.6, 26.1, 24.0, 19.0 ppm; IR (KBr):  $\nu_{\max}$  1711, 1612, 1469, 1325, 1169, 1130, 1067  $\text{cm}^{-1}$ ; HRMS (ESI) calcd for  $\text{C}_{21}\text{H}_{20}\text{F}_3\text{NNaO}_2$   $[\text{M}+\text{Na}]^+$  398.1338, found 398.1330.

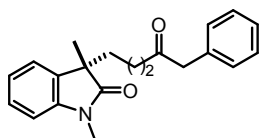

**3f:** Pale yellow liquid (80%, 51.4 mg);  $R_f$  0.25 (EtOAc/petroleum ether = 1:5);  $^1\text{H}$  NMR (400 MHz,  $\text{CDCl}_3$ ):  $\delta$  = 7.31-7.23 (m, 4H), 7.16-7.11 (m, 3H), 7.05 (td,  $J$  = 7.6, 0.8 Hz, 1H), 6.82 (d,  $J$  = 8.0 Hz, 1H), 3.57 (s, 2H), 3.19 (s, 3H), 2.41-2.27 (m, 2H),

1.84-1.73 (m, 2H), 1.31 (s, 3H), 1.22-1.13 (m, 2H);  $^{13}\text{C}$  NMR (100 MHz,  $\text{CDCl}_3$ ):  $\delta$  = 207.7, 180.5, 143.2, 134.1, 133.6, 129.3, 128.7, 127.7, 126.9, 122.5, 108.0, 50.0, 48.3, 41.7, 37.5, 26.1, 23.8, 18.7 ppm; IR (KBr):  $\nu_{\text{max}}$  1711, 1610, 1462, 1346  $\text{cm}^{-1}$ ; HRMS (ESI) calcd for  $\text{C}_{21}\text{H}_{23}\text{NNaO}_2$   $[\text{M}+\text{Na}]^+$  344.1621, found 344.1611.

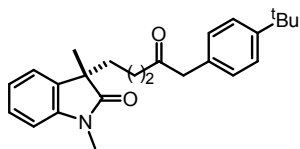

**3g:** Pale yellow liquid (68%, 51.3 mg);  $R_f$  0.25 (EtOAc/petroleum ether = 1:5);  $^1\text{H}$  NMR (400 MHz,  $\text{CDCl}_3$ ):  $\delta$  = 7.32 (d,  $J$  = 8.4 Hz, 2H), 7.27-7.23 (m, 1H), 7.15 (d,  $J$  = 7.2 Hz, 1H), 7.07-7.03 (m, 3H), 6.83 (d,  $J$  = 8.0 Hz, 1H), 3.54 (s, 2H), 3.19 (s, 3H), 2.40-2.25 (m, 2H), 1.84-1.68 (m, 2H), 1.32 (s, 3H), 1.30 (s, 9H), 1.22-1.14 (m, 2H);  $^{13}\text{C}$  NMR (100 MHz,  $\text{CDCl}_3$ ):  $\delta$  = 208.0, 180.5, 149.8, 143.2, 133.6, 131.0, 128.9, 127.7, 125.6, 122.5, 108.0, 49.5, 48.3, 41.6, 37.5, 34.4, 31.3, 26.1, 23.8, 18.7 ppm; IR (KBr):  $\nu_{\text{max}}$  1713, 1612, 1468, 1373, 1261  $\text{cm}^{-1}$ ; HRMS (ESI) calcd for  $\text{C}_{25}\text{H}_{31}\text{KNO}_2$   $[\text{M}+\text{K}]^+$  416.1986, found 416.1975.

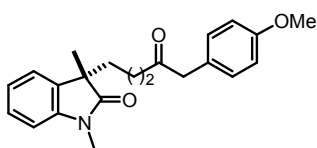

**3h:** Pale yellow liquid (66%, 46.3 mg);  $R_f$  0.3 (EtOAc/petroleum ether = 1:2);  $^1\text{H}$  NMR (400 MHz,  $\text{CDCl}_3$ ):  $\delta$  = 7.27-7.23 (m, 1H), 7.15 (d,  $J$  = 7.2 Hz, 1H), 7.07-7.02 (m, 3H), 6.85-6.82 (m, 3H), 3.78 (s, 3H), 3.50 (s, 2H), 3.19 (s, 3H), 2.37-2.23 (m, 2H), 1.83-1.67 (m, 2H), 1.31 (s, 3H), 1.21-1.12 (m, 2H);  $^{13}\text{C}$  NMR (100 MHz,  $\text{CDCl}_3$ ):  $\delta$  = 208.1, 180.5, 158.5, 143.2, 130.3, 127.7, 126.2, 122.5, 114.1, 108.0, 55.2, 49.1, 48.2, 41.5, 37.5, 26.1, 23.8, 18.7 ppm; IR (KBr):  $\nu_{\text{max}}$  1711, 1611, 1512, 1465, 1348, 1252  $\text{cm}^{-1}$ ; HRMS (ESI) calcd for  $\text{C}_{22}\text{H}_{25}\text{KNO}_3$   $[\text{M}+\text{K}]^+$  390.1466, found 390.1457.

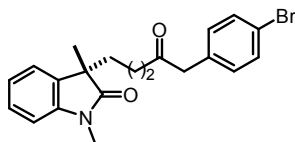

**3i:** Pale yellow liquid (62%, 49.5 mg);  $R_f$  0.25 (EtOAc/petroleum ether = 1:5);  $^1\text{H}$  NMR (400 MHz,  $\text{CDCl}_3$ ):  $\delta$  = 7.43 (d,  $J$  = 8.0 Hz, 2H), 7.30-7.26 (m, 1H), 7.17 (d,  $J$  = 6.8 Hz, 1H), 7.08 (t,  $J$  = 7.2 Hz, 1H), 7.01 (d,  $J$  = 8.4 Hz, 2H), 6.85 (d,  $J$  = 8.0 Hz,

1H), 3.55 (s, 2H), 3.22 (s, 3H), 2.41-2.27 (m, 2H), 1.84-1.73 (m, 2H), 1.34 (s, 3H), 1.24-1.17 (m, 2H); <sup>13</sup>C NMR (100 MHz, CDCl<sub>3</sub>): δ = 206.9, 180.4, 143.1, 133.5, 133.0, 131.7, 131.0, 127.8, 122.5, 121.0, 108.0, 49.0, 48.2, 41.9, 37.4, 26.1, 23.8, 18.7 ppm; IR (KBr): ν<sub>max</sub> 1711, 1612, 1490, 1469, 1376, 1348; HRMS (ESI) calcd for C<sub>21</sub>H<sub>22</sub>BrNNaO<sub>2</sub> [M+Na]<sup>+</sup> 422.0726, found 422.0713.

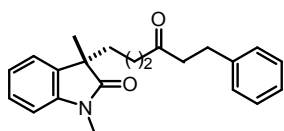

**3j:** Colorless liquid (73%, 48.9 mg); R<sub>f</sub> 0.25 (EtOAc/petroleum ether = 1:5); <sup>1</sup>H NMR (400 MHz, CDCl<sub>3</sub>): δ = 7.28-7.24 (m, 3H), 7.19-7.12 (m, 4H), 7.06 (t, *J* = 7.6 Hz, 1H), 6.84 (d, *J* = 7.6 Hz, 1H), 3.21 (s, 3H), 2.82 (t, *J* = 7.6 Hz, 2H), 2.62 (t, *J* = 7.6 Hz, 2H), 2.33-2.19 (m, 2H), 1.87-1.69 (m, 2H), 1.33 (s, 3H), 1.24-1.16 (m, 2H); <sup>13</sup>C NMR (100 MHz, CDCl<sub>3</sub>): δ = 209.4, 180.4, 143.1, 140.9, 133.6, 128.4, 128.2, 127.7, 126.0, 122.5, 108.0, 48.2, 44.0, 42.6, 37.5, 29.5, 26.1, 23.8, 18.7 ppm; IR (KBr): ν<sub>max</sub> 1711, 1612, 1493, 1469, 1375, 1348 cm<sup>-1</sup>; HRMS (ESI) calcd for C<sub>22</sub>H<sub>25</sub>NNaO<sub>2</sub> [M+Na]<sup>+</sup> 358.1777, found 358.1782.

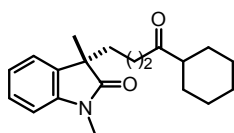

**3k:** Colorless liquid (40%, 25 mg); R<sub>f</sub> 0.25 (EtOAc/petroleum ether = 1:5); <sup>1</sup>H NMR (400 MHz, CDCl<sub>3</sub>): δ = 7.25 (t, *J* = 7.6 Hz, 1H), 7.18 (d, *J* = 7.2 Hz, 1H), 7.06 (t, *J* = 7.2 Hz, 1H), 6.83 (d, *J* = 7.6 Hz, 1H), 3.21 (s, 3H), 2.38-2.21 (m, 3H), 1.86-1.71 (m, 6H), 1.34 (s, 3H), 1.25-1.13 (m, 8H); <sup>13</sup>C NMR (100 MHz, CDCl<sub>3</sub>): δ = 213.6, 180.6, 143.2, 133.7, 127.7, 122.6, 122.5, 108.0, 50.6, 48.3, 40.3, 37.7, 28.4, 26.1, 25.8, 25.6, 23.9, 18.6 ppm; IR (KBr): ν<sub>max</sub> 1711, 1612, 1492, 1452, 1375, 1347 cm<sup>-1</sup>; HRMS (ESI) calcd for C<sub>20</sub>H<sub>27</sub>NNaO<sub>2</sub> [M+Na]<sup>+</sup> 336.1934, found 336.1936.

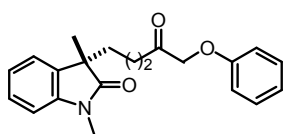

**3l:** Colorless liquid (80%, 53.9 mg); R<sub>f</sub> 0.25 (EtOAc/petroleum ether = 1:5); <sup>1</sup>H NMR (400 MHz, CDCl<sub>3</sub>): δ = 7.30-7.24 (m, 3H), 7.18 (d, *J* = 6.8 Hz, 1H), 7.06 (t, *J* = 7.6

Hz, 1H), 6.98 (t,  $J = 7.6$  Hz, 1H), 6.85-6.81 (m, 3H), 4.44 (s, 2H), 3.20 (s, 3H), 2.48 (td,  $J = 7.6, 1.2$  Hz, 2H), 1.92-1.75 (m, 2H), 1.34 (s, 3H), 1.30-1.21 (m, 2H);  $^{13}\text{C}$  NMR (100 MHz,  $\text{CDCl}_3$ ):  $\delta = 207.2, 180.4, 157.6, 143.2, 133.5, 129.6, 127.8, 122.5, 121.6, 114.4, 108.0, 72.6, 48.2, 38.8, 37.5, 26.1, 23.9, 18.1$  ppm; IR (KBr):  $\nu_{\text{max}}$  1707, 1608, 1491, 1463, 1375, 1241  $\text{cm}^{-1}$ ; HRMS (ESI) calcd for  $\text{C}_{21}\text{H}_{23}\text{NNaO}_3$   $[\text{M}+\text{Na}]^+$  360.1570, found 360.1573.



## Characterization of Products 4

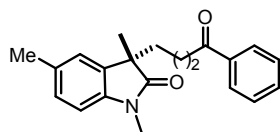

**4b:** Pale yellow solid (73%, 46.9 mg), mp = 93-95 °C;  $R_f$  0.25 (EtOAc/petroleum ether = 1:5);  $^1\text{H}$  NMR (400 MHz,  $\text{CDCl}_3$ ):  $\delta$  = 7.86-7.84 (m, 2H), 7.55-7.51 (m, 1H), 7.44-7.40 (m, 2H), 7.06-7.01 (m, 2H), 6.73 (d,  $J$  = 7.6 Hz, 1H), 3.20 (s, 3H), 2.88-2.78 (m, 2H), 2.33 (s, 3H), 2.01-1.82 (m, 2H), 1.42-1.35 (m, 5H);  $^{13}\text{C}$  NMR (100 MHz,  $\text{CDCl}_3$ ):  $\delta$  = 199.7, 180.5, 140.9, 136.8, 133.8, 132.9, 132.1, 128.5, 128.0, 127.9, 123.4, 107.8, 48.4, 38.4, 37.8, 26.2, 24.0, 21.1, 19.3 ppm; IR (KBr):  $\nu_{\text{max}}$  1710, 1601, 1498, 1454, 1351, 1260  $\text{cm}^{-1}$ ; HRMS (ESI) calcd for  $\text{C}_{21}\text{H}_{23}\text{NNaO}_2$   $[\text{M}+\text{Na}]^+$  344.1621, found 344.1624.

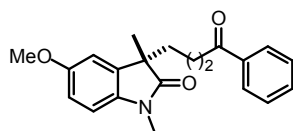

**4c:** Pale yellow solid (60%, 40.4 mg), mp = 87-89 °C;  $R_f$  0.3 (EtOAc/petroleum ether = 1:2);  $^1\text{H}$  NMR (400 MHz,  $\text{CDCl}_3$ ):  $\delta$  = 7.86 (dd,  $J$  = 7.2, 1.2 Hz, 2H), 7.52 (t,  $J$  = 7.6 Hz, 1H), 7.43-7.39 (m, 2H), 6.82-6.73 (m, 3H), 3.79 (s, 3H), 3.19 (s, 3H), 2.92-2.77 (m, 2H), 2.01-1.80 (m, 2H), 1.41-1.35 (m, 5H);  $^{13}\text{C}$  NMR (100 MHz,  $\text{CDCl}_3$ ):  $\delta$  = 199.5, 180.1, 156.1, 136.8, 135.1, 132.9, 128.5, 127.9, 111.7, 110.3, 108.2, 55.7, 48.8, 38.3, 37.8, 26.2, 24.0, 19.3 ppm; IR (KBr):  $\nu_{\text{max}}$  1707, 1600, 1496, 1356, 1287, 1214  $\text{cm}^{-1}$ ; HRMS (ESI) calcd for  $\text{C}_{21}\text{H}_{23}\text{NNaO}_3$   $[\text{M}+\text{Na}]^+$  360.1570, found 360.1572.

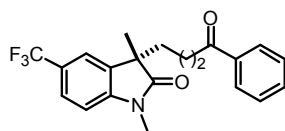

**4d:** Pale yellow liquid (80%, 60 mg);  $R_f$  0.2 (EtOAc/petroleum ether = 1:5);  $^1\text{H}$  NMR (400 MHz,  $\text{CDCl}_3$ ):  $\delta$  = 7.85 (dd,  $J$  = 7.2, 1.2 Hz, 2H), 7.56-7.50 (m, 2H), 7.43-7.39 (m, 3H), 6.91 (d,  $J$  = 8.0 Hz, 1H), 3.25 (s, 3H), 2.90-2.83 (m, 2H), 2.06-1.85 (m, 2H), 1.43-1.30 (m, 5H);  $^{13}\text{C}$  NMR (100 MHz,  $\text{CDCl}_3$ ):  $\delta$  = 199.2, 180.4, 146.3, 136.7, 134.3, 133.0, 128.5, 127.8, 125.7 (q,  $J_{\text{C-F}}$  = 4.0 Hz), 124.8 (q,  $J_{\text{C-F}}$  = 32.5 Hz), 124.4 (q,

$J_{C-F} = 271.2$  Hz), 119.5 (q,  $J = 3.6$  Hz), 107.8, 48.4, 38.2, 37.7, 26.3, 23.8, 19.0 ppm; IR (KBr):  $\nu_{\max}$  1723, 1619, 1455, 1332, 1279, 1118  $\text{cm}^{-1}$ ; HRMS (ESI) calcd for  $\text{C}_{21}\text{H}_{20}\text{F}_3\text{NNaO}_2$   $[\text{M}+\text{Na}]^+$  398.1338, found 398.1337.

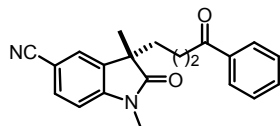

**4e:** Pale yellow liquid (68%, 45.2 mg);  $R_f$  0.2 (EtOAc/petroleum ether = 1:5);  $^1\text{H}$  NMR (400 MHz,  $\text{CDCl}_3$ ):  $\delta = 7.86$  (dd,  $J = 7.2, 1.2$  Hz, 2H), 7.60 (dd,  $J = 8.0, 1.6$  Hz, 1H), 7.56-7.52 (m, 1H), 7.45-7.41 (m, 3H), 6.91 (d,  $J = 8.0$  Hz, 1H), 3.25 (s, 3H), 2.91-2.85 (m, 2H), 2.01-1.83 (m, 2H), 1.41-1.29 (m, 5H);  $^{13}\text{C}$  NMR (100 MHz,  $\text{CDCl}_3$ ):  $\delta = 199.1, 180.1, 147.2, 136.7, 134.8, 133.3, 133.1, 128.6, 127.9, 125.9, 119.2, 108.5, 105.7, 48.3, 38.1, 37.6, 26.4, 23.8, 19.0$  ppm; IR (KBr):  $\nu_{\max}$  2221, 1722, 1611, 1496, 1453, 1344, 1256  $\text{cm}^{-1}$ ; HRMS (ESI) calcd for  $\text{C}_{21}\text{H}_{20}\text{N}_2\text{NaO}_2$   $[\text{M}+\text{Na}]^+$  355.1417, found 355.1412.

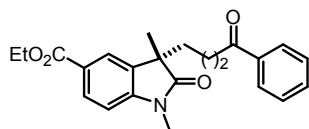

**4f:** Colorless liquid (83%, 62.9 mg);  $R_f$  0.2 (EtOAc/petroleum ether = 1:5);  $^1\text{H}$  NMR (400 MHz,  $\text{CDCl}_3$ ):  $\delta = 8.02$  (dd,  $J = 8.4, 1.6$  Hz, 1H), 7.86-7.83 (m, 3H), 7.52 (t,  $J = 7.6$  Hz, 1H), 7.41 (t,  $J = 7.6$  Hz, 2H), 6.87 (d,  $J = 8.4$  Hz, 1H), 4.42-4.31 (m, 2H), 3.25 (s, 3H), 2.93-2.77 (m, 2H), 2.06-1.86 (m, 2H), 1.44-1.27 (m, 5H);  $^{13}\text{C}$  NMR (100 MHz,  $\text{CDCl}_3$ ):  $\delta = 199.3, 180.8, 166.5, 147.4, 136.7, 133.6, 133.0, 130.6, 128.5, 127.9, 124.9, 123.7, 107.5, 60.9, 48.3, 38.3, 37.7, 26.4, 23.9, 19.1, 14.4$  ppm; IR (KBr):  $\nu_{\max}$  1709, 1615, 1498, 1454, 1372, 1276  $\text{cm}^{-1}$ ; HRMS (ESI) calcd for  $\text{C}_{23}\text{H}_{25}\text{NNaO}_4$   $[\text{M}+\text{Na}]^+$  402.1676, found 402.1671.

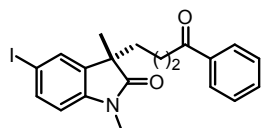

**4g:** Pale yellow liquid (87%, 75.3 mg);  $R_f$  0.25 (EtOAc/petroleum ether = 1:5);  $^1\text{H}$  NMR (400 MHz,  $\text{CDCl}_3$ ):  $\delta = 7.87$  (dd,  $J = 7.2, 1.6$  Hz, 2H), 7.59-7.54 (m, 2H), 7.52-7.41 (m, 3H), 6.63 (d,  $J = 8.0$  Hz, 1H), 3.19 (s, 3H), 2.90-2.83 (m, 2H), 1.99-1.79 (m,

2H), 1.41-1.33 (m, 5H);  $^{13}\text{C}$  NMR (100 MHz,  $\text{CDCl}_3$ ):  $\delta$  = 199.4, 179.7, 143.0, 136.8, 136.7, 136.2, 133.0, 131.4, 128.6, 127.9, 110.1, 85.2, 48.5, 38.3, 37.7, 26.2, 23.9, 19.1 ppm; IR (KBr):  $\nu_{\text{max}}$  1714, 1602, 1484, 1341  $\text{cm}^{-1}$ ; HRMS (ESI) calcd for  $\text{C}_{20}\text{H}_{20}\text{NNaO}_2$   $[\text{M}+\text{Na}]^+$  456.0431, found 456.0423.

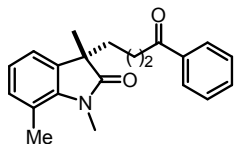

**4h:** White solid (62%, 39.8 mg), mp = 97-99 °C;  $R_f$  0.25 (EtOAc/petroleum ether = 1:5);  $^1\text{H}$  NMR (400 MHz,  $\text{CDCl}_3$ ):  $\delta$  = 7.86 (dd,  $J$  = 7.2, 1.2 Hz, 2H), 7.55-7.51 (m, 1H), 7.42 (td,  $J$  = 7.6, 1.6 Hz, 2H), 7.04-6.92 (m, 3H), 3.50 (s, 3H), 2.88-2.81 (m, 2H), 2.58 (s, 3H), 1.97-1.83 (m, 2H), 1.39-1.31 (m, 5H);  $^{13}\text{C}$  NMR (100 MHz,  $\text{CDCl}_3$ ):  $\delta$  = 199.6, 181.3, 141.0, 136.8, 134.3, 132.9, 131.5, 128.5, 127.9, 122.5, 120.5, 119.6, 47.7, 38.4, 38.1, 29.5, 24.5, 19.3, 19.1 ppm; IR (KBr):  $\nu_{\text{max}}$  1708, 1600, 1459, 1364, 1337  $\text{cm}^{-1}$ ; HRMS (ESI) calcd for  $\text{C}_{21}\text{H}_{23}\text{NNaO}_2$   $[\text{M}+\text{Na}]^+$  344.1621, found 344.1614.

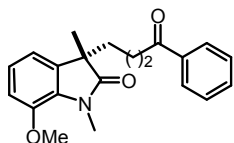

**4i:** Colorless liquid (45%, 30.3 mg);  $R_f$  0.3 (EtOAc/petroleum ether = 1:2);  $^1\text{H}$  NMR (400 MHz,  $\text{CDCl}_3$ ):  $\delta$  = 7.85 (dd,  $J$  = 7.2, 1.6 Hz, 2H), 7.54-7.50 (m, 1H), 7.44-7.40 (m, 2H), 7.02-6.98 (m, 1H), 6.82 (dd,  $J$  = 8.0, 0.8 Hz, 2H), 3.86 (s, 3H), 3.49 (s, 3H), 2.88-2.81 (m, 2H), 1.97-1.83 (m, 2H), 1.39-1.32 (m, 5H);  $^{13}\text{C}$  NMR (100 MHz,  $\text{CDCl}_3$ ):  $\delta$  = 199.6, 180.8, 145.3, 136.8, 135.4, 132.9, 131.0, 128.5, 127.9, 123.1, 115.3, 111.6, 55.8, 48.4, 38.4, 38.0, 29.4, 24.3, 19.3 ppm; IR (KBr):  $\nu_{\text{max}}$  1707, 1605, 1464, 1336, 1249  $\text{cm}^{-1}$ ; HRMS (ESI) calcd for  $\text{C}_{21}\text{H}_{23}\text{NNaO}_3$   $[\text{M}+\text{Na}]^+$  360.1570, found 360.1565.

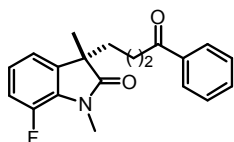

**4j:** Colorless liquid (63%, 41 mg);  $R_f$  0.3 (EtOAc/petroleum ether = 1:5);  $^1\text{H}$  NMR (400 MHz,  $\text{CDCl}_3$ ):  $\delta$  = 7.86 (dd,  $J$  = 7.2, 1.2 Hz, 2H), 7.55-7.51 (m, 1H), 7.44-7.41 (m, 2H), 6.99-6.96 (m, 3H), 3.43 (d,  $J$  = 2.8 Hz, 3H), 2.94-2.79 (m, 2H), 2.01-1.83 (m,

2H), 1.42-1.37 (m, 5H);  $^{13}\text{C}$  NMR (100 MHz,  $\text{CDCl}_3$ ):  $\delta$  = 199.4, 180.1, 147.7 (d,  $J_{\text{C-F}}$  = 242.0 Hz), 146.8, 136.7 (d,  $J_{\text{C-F}}$  = 3.0 Hz), 133.0, 129.8 (d,  $J_{\text{C-F}}$  = 7.7 Hz), 128.5, 127.9, 123.1 (d,  $J_{\text{C-F}}$  = 3.0 Hz), 118.4 (d,  $J_{\text{C-F}}$  = 3.2 Hz), 115.8 (d,  $J_{\text{C-F}}$  = 19.2 Hz), 48.8 (d,  $J_{\text{C-F}}$  = 1.4 Hz), 38.2, 37.9, 28.6 (d,  $J_{\text{C-F}}$  = 5.6 Hz), 24.2, 19.1 ppm; IR (KBr):  $\nu_{\text{max}}$  1718, 1630, 1483, 1371, 1336, 1237  $\text{cm}^{-1}$ ; HRMS (ESI) calcd for  $\text{C}_{20}\text{H}_{20}\text{FNNaO}_2$   $[\text{M}+\text{Na}]^+$  348.1370, found 348.1365.

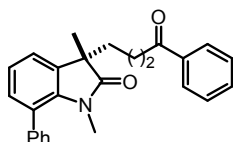

**4k:** White solid (72%, 55.2 mg), mp = 128-130  $^{\circ}\text{C}$ ;  $R_f$  0.3 (EtOAc/petroleum ether = 1:5);  $^1\text{H}$  NMR (400 MHz,  $\text{CDCl}_3$ ):  $\delta$  = 7.88 (dd,  $J$  = 7.2, 1.2 Hz, 2H), 7.54 (td,  $J$  = 7.6, 1.2 Hz, 1H), 7.45-7.35 (m, 7H), 7.22-7.20 (m, 1H), 7.10-7.05 (m, 2H), 2.91-2.87 (m, 2H), 2.85 (s, 3H), 2.02-1.91 (m, 2H), 1.49-1.26 (m, 5H);  $^{13}\text{C}$  NMR (100 MHz,  $\text{CDCl}_3$ ):  $\delta$  = 199.6, 181.5, 140.1, 139.0, 136.8, 134.7, 132.9, 130.8, 130.0, 128.5, 127.9, 127.7, 127.5, 125.4, 121.9, 121.6, 47.6, 38.3, 38.1, 30.1, 24.4, 19.2 ppm; IR (KBr):  $\nu_{\text{max}}$  1712, 1598, 1454, 1367, 1336, 1065  $\text{cm}^{-1}$ ; HRMS (ESI) calcd for  $\text{C}_{26}\text{H}_{25}\text{NNaO}_2$   $[\text{M}+\text{Na}]^+$  406.1777, found 406.1773.

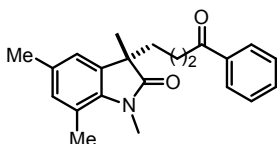

**4l:** Pale yellow liquid (67%, 44.9 mg);  $R_f$  0.25 (EtOAc/petroleum ether = 1:5);  $^1\text{H}$  NMR (400 MHz,  $\text{CDCl}_3$ ):  $\delta$  = 7.84 (dd,  $J$  = 7.2, 1.2 Hz, 2H), 7.52 (t,  $J$  = 7.2 Hz, 1H), 7.43-7.39 (m, 2H), 6.65 (s, 1H), 6.52 (s, 1H), 3.19 (s, 3H), 2.87-2.79 (m, 2H), 2.35 (s, 3H), 2.33 (s, 3H), 2.17-1.96 (m, 2H), 1.41 (s, 3H), 1.35-1.19 (m, 2H);  $^{13}\text{C}$  NMR (100 MHz,  $\text{CDCl}_3$ ):  $\delta$  = 199.6, 180.9, 143.6, 137.6, 136.8, 134.0, 132.9, 128.5, 127.9, 127.2, 125.7, 106.8, 49.2, 38.2, 35.9, 26.2, 22.6, 21.5, 19.7, 18.0 ppm; IR (KBr):  $\nu_{\text{max}}$  1711, 1619, 1452, 1378, 1334, 1240  $\text{cm}^{-1}$ ; HRMS (ESI) calcd for  $\text{C}_{22}\text{H}_{25}\text{NNaO}_2$   $[\text{M}+\text{Na}]^+$  358.1777, found 358.1768.

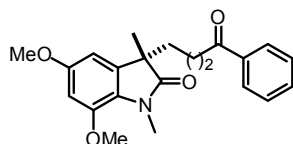

**4m:** Solid (29%, 21.3 mg), mp = 123-125 °C;  $R_f$  0.35 (EtOAc/petroleum ether = 1:2);  $^1\text{H}$  NMR (400 MHz,  $\text{CDCl}_3$ ):  $\delta$  = 7.86 (dd,  $J$  = 6.8, 1.6 Hz, 2H), 7.55-7.51 (m, 1H), 7.44-7.40 (m, 2H), 6.41-6.39 (m, 2H), 3.83 (s, 3H), 3.79 (s, 3H), 3.44 (s, 3H), 2.92-2.78 (m, 2H), 1.98-1.77 (m, 2H), 1.39-1.33 (m, 5H);  $^{13}\text{C}$  NMR (100 MHz,  $\text{CDCl}_3$ ):  $\delta$  = 199.7, 180.4, 156.7, 145.9, 136.8, 136.0, 132.9, 128.5, 127.9, 124.5, 100.4, 98.9, 55.8, 49.0, 38.4, 38.0, 29.3, 24.4, 19.3 ppm; IR (KBr):  $\nu_{\text{max}}$  1702, 1605, 1496, 1456, 1363, 1270, 1210, 1153  $\text{cm}^{-1}$ ; HRMS (ESI) calcd for  $\text{C}_{22}\text{H}_{25}\text{NNaO}_4$   $[\text{M}+\text{Na}]^+$  390.1676, found 390.1671.

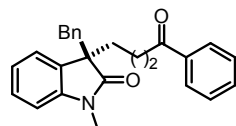

**4n:** White solid (75%, 57.5 mg), mp = 154-156 °C;  $R_f$  0.35 (EtOAc/petroleum ether = 1:5);  $^1\text{H}$  NMR (400 MHz,  $\text{CDCl}_3$ ):  $\delta$  = 7.86 (dd,  $J$  = 7.2, 1.6 Hz, 2H), 7.53 (t,  $J$  = 7.6 Hz, 1H), 7.42 (t,  $J$  = 7.2 Hz, 2H), 7.17 (t,  $J$  = 7.2 Hz, 2H), 7.06-6.99 (m, 4H), 6.82-6.80 (m, 2H), 6.58 (d,  $J$  = 7.6 Hz, 1H), 3.13 (d,  $J$  = 12.8 Hz, 1H), 3.02 (d,  $J$  = 12.8 Hz, 1H), 2.95-2.80 (m, 5H), 2.18-1.99 (m, 2H), 1.46-1.38 (m, 2H);  $^{13}\text{C}$  NMR (100 MHz,  $\text{CDCl}_3$ ):  $\delta$  = 199.5, 179.0, 143.8, 136.8, 135.7, 132.9, 130.8, 129.8, 128.5, 127.9, 127.8, 127.4, 126.4, 123.5, 122.2, 107.8, 54.7, 44.5, 38.4, 36.3, 25.8, 19.2 ppm; IR (KBr):  $\nu_{\text{max}}$  1703, 1611, 1493, 1450, 1375, 1261  $\text{cm}^{-1}$ ; HRMS (ESI) calcd for  $\text{C}_{26}\text{H}_{25}\text{NNaO}_2$   $[\text{M}+\text{Na}]^+$  406.1777, found 406.1763.

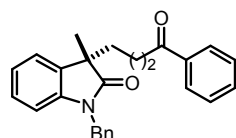

**4o:** Colorless liquid (70%, 53.6 mg);  $R_f$  0.25 (EtOAc/petroleum ether = 1:5);  $^1\text{H}$  NMR (400 MHz,  $\text{CDCl}_3$ ):  $\delta$  = 7.86 (d,  $J$  = 7.6 Hz, 2H), 7.53 (t,  $J$  = 7.6 Hz, 1H), 7.42 (t,  $J$  = 7.6 Hz, 2H), 7.29-7.21 (m, 6H), 7.14 (td,  $J$  = 7.6, 0.8 Hz, 1H), 7.04 (t,  $J$  = 7.6 Hz, 1H), 6.73 (d,  $J$  = 7.6 Hz, 1H), 4.96 (d,  $J$  = 15.6 Hz, 1H), 4.91 (d,  $J$  = 16.0 Hz, 1H), 2.94-2.79 (m, 2H), 2.08-1.91 (m, 2H), 1.54-1.38 (m, 5H);  $^{13}\text{C}$  NMR (100 MHz,

CDCl<sub>3</sub>):  $\delta$  = 199.5, 180.6, 142.3, 136.8, 136.0, 133.7, 132.9, 128.7, 128.5, 127.9, 127.7, 127.5, 127.2, 122.7, 122.6, 109.1, 48.4, 43.6, 38.4, 37.8, 24.3, 19.5 ppm; IR (KBr):  $\nu_{\max}$  1711, 1610, 1489, 1451, 1353, 1174 cm<sup>-1</sup>; HRMS (ESI) calcd for C<sub>26</sub>H<sub>25</sub>NNaO<sub>2</sub> [M+Na]<sup>+</sup> 406.1777, found 406.1766.

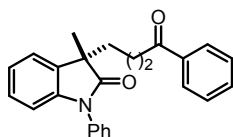

**4p:** White solid (76%, 56.1 mg), mp = 125-126 °C; R<sub>f</sub> 0.25 (EtOAc/petroleum ether = 1:5); <sup>1</sup>H NMR (400 MHz, CDCl<sub>3</sub>):  $\delta$  = 7.87 (dd, *J* = 7.6, 1.2 Hz, 2H), 7.55-7.50 (m, 3H), 7.44-7.38 (m, 5H), 7.28 (d, *J* = 7.2 Hz, 1H), 7.19 (td, *J* = 7.6, 1.2 Hz, 1H), 7.11 (t, *J* = 7.2 Hz, 1H), 6.84 (d, *J* = 8.0 Hz, 1H), 2.93-2.87 (m, 2H), 2.08-1.97 (m, 2H), 1.57-1.50 (m, 5H); <sup>13</sup>C NMR (100 MHz, CDCl<sub>3</sub>):  $\delta$  = 199.5, 180.0, 143.2, 136.8, 134.6, 133.5, 132.9, 129.5, 128.5, 127.9, 127.7, 126.6, 123.1, 122.9, 109.4, 48.5, 38.3, 38.2, 24.2, 19.3 ppm; IR (KBr):  $\nu_{\max}$  1721, 1603, 1497, 1456, 1371, 1203 cm<sup>-1</sup>; HRMS (ESI) calcd for C<sub>25</sub>H<sub>23</sub>NNaO<sub>2</sub> [M+Na]<sup>+</sup> 392.1621, found 392.1607.

## General Procedure for the Cyclization of Acrylamide **1a** with Cyclobutanols

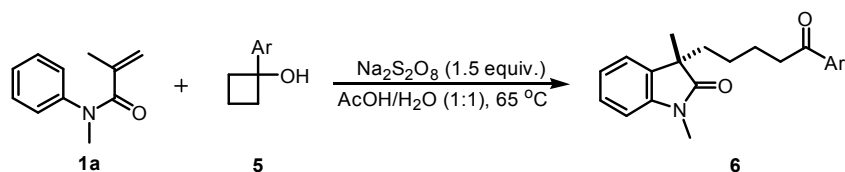

Acrylamide **1a** (0.2 mmol, 1.0 equiv), and Na<sub>2</sub>S<sub>2</sub>O<sub>8</sub> (71.4 mg, 1.5 equiv) were added into an oven-dried Schlenk-tube. The tube was evacuated and backfilled with nitrogen (3 times). Then, a solution of tertiary cyclobutanols **5** (0.4 mmol, 2.0 equiv) in HOAc/H<sub>2</sub>O (1:1, 2 mL) was injected into the tube by syringe. The tube was then sealed with a Teflon lined cap and the mixture was stirred at 65 °C for 24 h. The resulting mixture was diluted with EtOAc, and the organic phase was washed successively with H<sub>2</sub>O, NaHCO<sub>3</sub> (2 times) and brine then dried over Na<sub>2</sub>SO<sub>4</sub> and concentrated in vacuo. The residue was purified by column chromatography on silica gel (gradient eluent of EtOAc/petroleum ether: 1/10 to 1/5) to give the corresponding products **6** in yields listed in equation 1.

## Characterization of Products 6

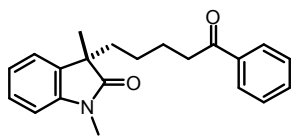

**6a:** Colorless liquid (40%, 25.7 mg);  $R_f$  0.25 (EtOAc/petroleum ether = 1:5);  $^1\text{H}$  NMR (400 MHz,  $\text{CDCl}_3$ ):  $\delta$  = 7.89-7.87 (m, 2H), 7.52 (t,  $J$  = 7.2 Hz, 1H), 7.44-7.40 (m, 2H), 7.26 (td,  $J$  = 7.6, 1.2 Hz, 1H), 7.17 (dd,  $J$  = 7.2, 0.8 Hz, 1H), 7.06 (td,  $J$  = 7.6, 0.4 Hz, 1H), 6.84 (d,  $J$  = 8.0 Hz, 1H), 3.21 (s, 3H), 2.87-2.76 (m, 2H), 2.00-1.74 (m, 2H), 1.65-1.58 (m, 2H), 1.35 (s, 3H), 1.10-0.93 (m, 2H);  $^{13}\text{C}$  NMR (100 MHz,  $\text{CDCl}_3$ ):  $\delta$  = 200.0, 180.6, 143.2, 136.8, 134.0, 132.8, 128.5, 127.9, 127.6, 122.5, 122.4, 107.9, 48.3, 38.2, 26.1, 24.2, 23.8 ppm; IR (KBr):  $\nu_{\text{max}}$  1712, 1610, 1468, 1375, 1253, 1125  $\text{cm}^{-1}$ ; HRMS (ESI) calcd for  $\text{C}_{21}\text{H}_{23}\text{NNaO}_2$   $[\text{M}+\text{Na}]^+$  344.1621, found 344.1624.

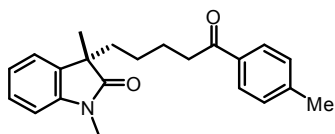

**6b:** Colorless liquid (40%, 26.8 mg);  $R_f$  0.25 (EtOAc/petroleum ether = 1:5);  $^1\text{H}$  NMR (400 MHz,  $\text{CDCl}_3$ ):  $\delta$  = 7.78 (d,  $J$  = 8.0 Hz, 2H), 7.28-7.21 (m, 3H), 7.17 (d,  $J$  = 7.2 Hz, 1H), 7.06 (t,  $J$  = 7.2 Hz, 1H), 6.84 (d,  $J$  = 7.6 Hz, 1H), 3.21 (s, 3H), 2.84-2.69 (m, 2H), 2.39 (s, 3H), 1.99-1.74 (m, 2H), 1.64-1.56 (m, 2H), 1.35 (s, 3H), 1.09-0.92 (m, 2H);  $^{13}\text{C}$  NMR (100 MHz,  $\text{CDCl}_3$ ):  $\delta$  = 199.7, 180.7, 143.6, 143.2, 134.3, 134.0, 129.2, 128.1, 127.6, 122.5, 107.9, 48.3, 38.2, 26.1, 24.3, 23.8, 21.6 ppm; IR (KBr):  $\nu_{\text{max}}$  1712, 1608, 1461, 1366, 1252, 1185, 1021  $\text{cm}^{-1}$ ; HRMS (ESI) calcd for  $\text{C}_{22}\text{H}_{25}\text{NNaO}_2$   $[\text{M}+\text{Na}]^+$  358.1777, found 358.1780.

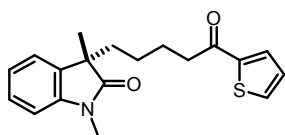

**6c:** Pale yellow liquid (44%, 28.8 mg);  $R_f$  0.25 (EtOAc/petroleum ether = 1:5);  $^1\text{H}$  NMR (400 MHz,  $\text{CDCl}_3$ ):  $\delta$  = 7.63 (d,  $J$  = 4.0 Hz, 1H), 7.59 (d,  $J$  = 4.8 Hz, 1H), 7.26 (t,  $J$  = 7.6 Hz, 1H), 7.16 (d,  $J$  = 6.8 Hz, 1H), 7.10-7.04 (m, 2H), 6.84 (d,  $J$  = 7.6 Hz,



1H), 3.21 (s, 3H), 2.84-2.69 (m, 2H), 1.99-1.74 (m, 2H), 1.65-1.58 (m, 2H), 1.35 (s, 3H), 1.09-0.95 (m, 2H); <sup>13</sup>C NMR (100 MHz, CDCl<sub>3</sub>): δ = 193.0, 180.6, 144.2, 143.2, 133.9, 133.4, 131.7, 128.0, 127.7, 122.5, 122.4, 107.9, 48.3, 39.0, 38.1, 26.1, 24.5, 24.2, 23.8 ppm; IR (KBr): ν<sub>max</sub> 1706, 1608, 1465, 1356, 1248, 1080 cm<sup>-1</sup>; HRMS (ESI) calcd for C<sub>19</sub>H<sub>21</sub>NNaO<sub>2</sub>S [M+Na]<sup>+</sup> 350.1185, found 350.1187.

## Investigation of the Reaction Mechanism

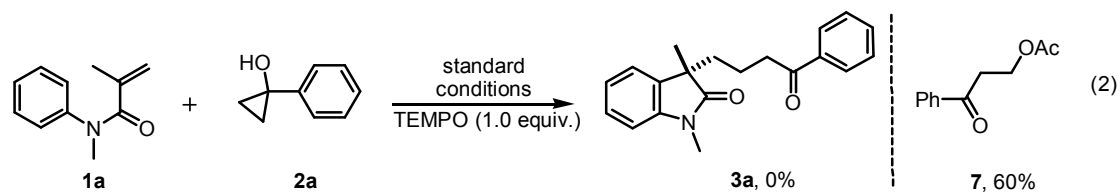

When 1.0 equiv of TEMPO was added to the reaction of **1a** with **2a** under the standard conditions, no desired product **3a** was detected along with a coupling product **7** isolated in 60%. The result indicates that the radical intermediate probably be involved in the catalytic cycle of the reaction.

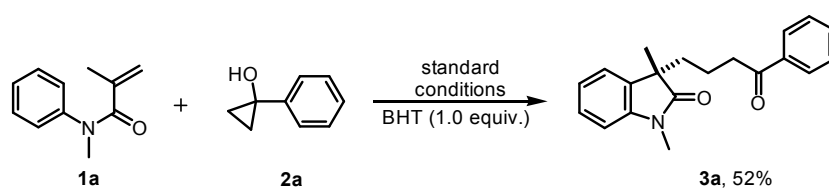

When 1.0 equiv of BHT was added to the reaction of **1a** with **2a** under the standard conditions, 52% yield of desired product **3a** was isolated along with 38% **1a** recovered. The result indicates that the radical intermediate probably be involved in the catalytic cycle of the reaction.

## Isotope Labeling Experiment

### a) Intramolecular Kinetic Isotope Effect (KIE) Experiment:

An oven-dried Schlenk-tube was charged with [D<sub>1</sub>]-**1a** (0.1 mmol, 1.0 equiv) and Na<sub>2</sub>S<sub>2</sub>O<sub>8</sub> (35.7 mg, 1.5 equiv). The tube was evacuated and backfilled with nitrogen (3 times). Then, a solution of tertiary cycloalkanol **2a** (0.15 mmol, 1.5 equiv) in HOAc/H<sub>2</sub>O (1:1, 1 mL) was injected into the tube by syringe. The tube was then sealed with a Teflon lined cap and the mixture was stirred at 50 °C for 3.5 h. The resulting mixture was diluted with EtOAc, and the organic phase was washed successively with H<sub>2</sub>O (1 time), NaHCO<sub>3</sub> (3 times) and brine (1 time) then dried over Na<sub>2</sub>SO<sub>4</sub> and concentrated in vacuo. The residue was purified by column chromatography on silica gel to give the corresponding product in 60% yield. The product was analyzed by <sup>1</sup>H NMR (Figure 1).

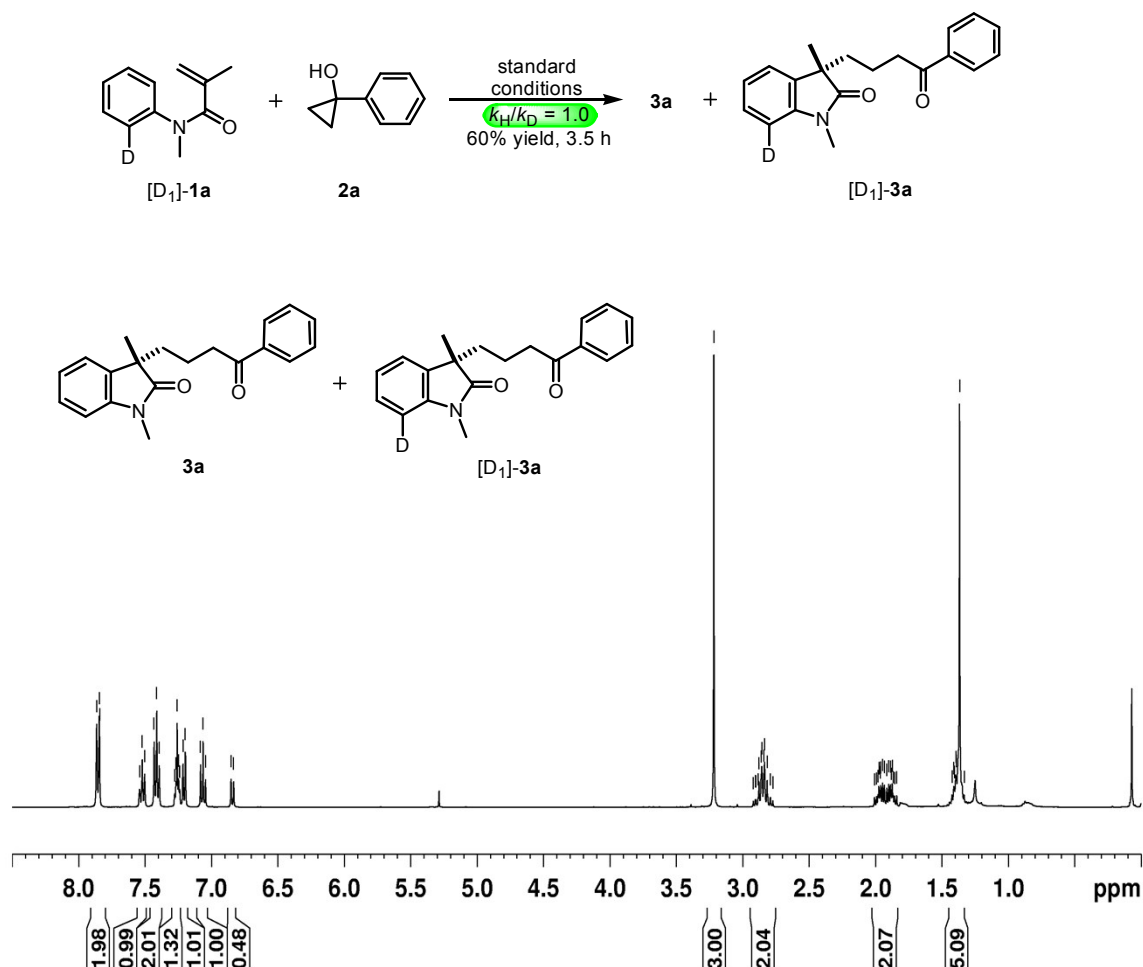

Figure 1. <sup>1</sup>H NMR spectra of the mixture of the product **3a** and [D<sub>1</sub>]-**3a**.

### b) Intermolecular Kinetic Isotope Effect (KIE) Experiment:

An oven-dried Schlenk-tube was charged with **1a** (0.05 mmol), [D<sub>5</sub>]-**1a** (0.05 mmol) and Na<sub>2</sub>S<sub>2</sub>O<sub>8</sub> (35.7 mg, 1.5 equiv). The tube was evacuated and backfilled with nitrogen (3 times). Then, a solution of tertiary cycloalkanol **2a** (0.15 mmol, 1.5 equiv) in HOAc/H<sub>2</sub>O (1:1, 1 mL) was injected into the tube by syringe. The tube was then sealed with a Teflon lined cap and the mixture was stirred at 50 °C for 3.5 h. The resulting mixture was diluted with EtOAc, and the organic phase was washed successively with H<sub>2</sub>O (1 time), NaHCO<sub>3</sub> (2 times) and brine (1 time) then dried over Na<sub>2</sub>SO<sub>4</sub> and concentrated in vacuo. The residue was purified by column chromatography on silica gel to give the corresponding product in 65% yield. The product was analyzed by <sup>1</sup>H NMR (Figure 2).

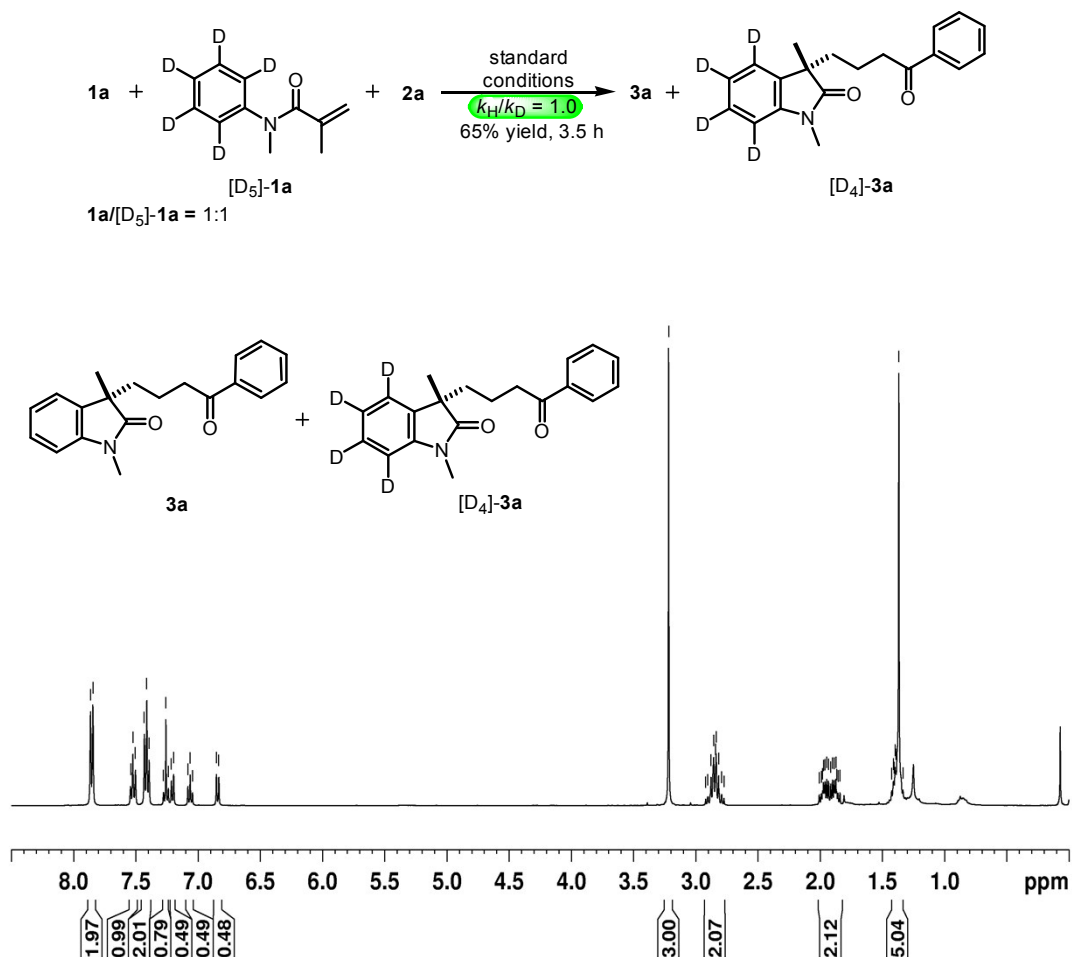

Figure 2. <sup>1</sup>H NMR spectra of the mixture of the product **3a** and [D<sub>4</sub>]-**3a**.

## References

- 1 (a) T. Wu, X. Mu and G. Liu, *Angew. Chem., Int. Ed.*, 2011, **50**, 12578; (b) X. Mu, T. Wu, H.-Y. Wang, Y.-L. Guo and G. Liu, *J. Am. Chem. Soc.*, 2012, **134**, 878; (c) D. C. Fabry, M. Stodulski, S. Hoerner and T. Gulder, *Chem. Eur. J.*, 2012, **18**, 10834.
- 2 (a) A. Ilangovan, S. Saravanakumar and S. Malayappasamy, *Org. Lett.*, 2013, **15**, 4968; (b) J. Jiao, L. X. Nguyen, D. R. Patterson and R. A. Flowers II, *Org. Lett.*, 2007, **9**, 1323; (c) D. Rosa and A. Orellana, *Chem. Commun.*, 2013, **49**, 5420.
- 3 (a) B. M. Casey, C. A. Eakin and R. A. Flowers II, *Tetrahedron Lett.*, 2009, **50**, 1264; (b) H.-J. Xu, F.-F. Zhu, Y.-Y. Shen, X. Wan and Y.-S. Feng, *Tetrahedron*, 2012, **68**, 4145.

# <sup>1</sup>H NMR and <sup>13</sup>C NMR Spectra of Products 3

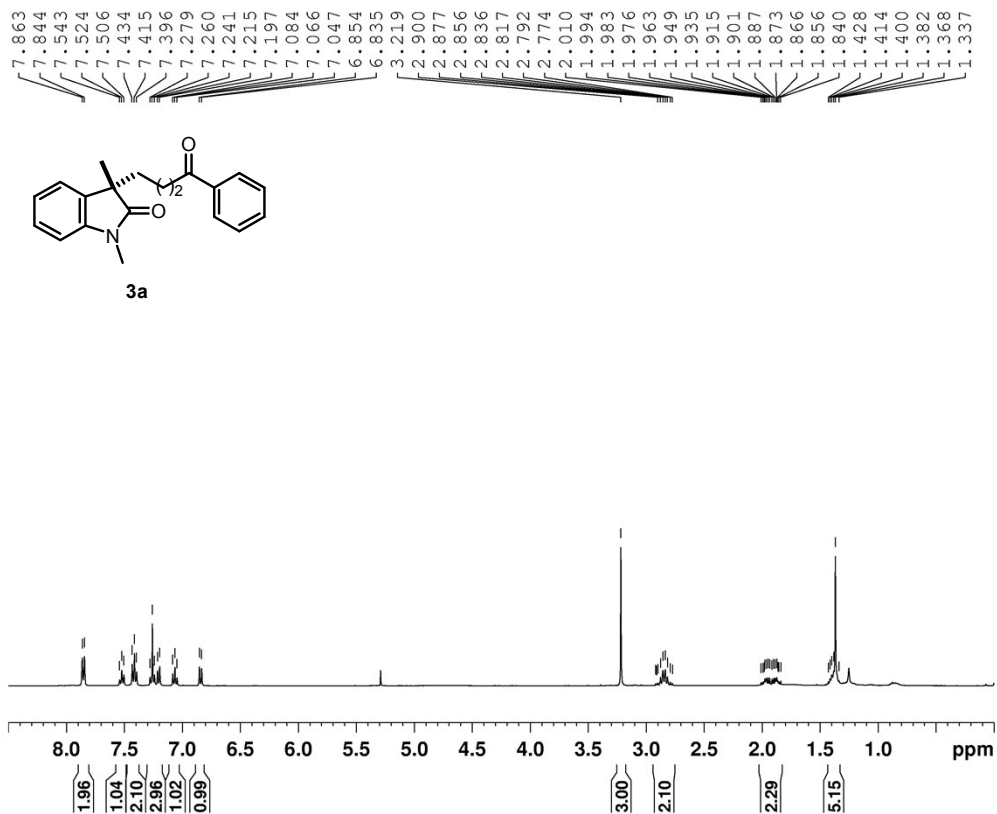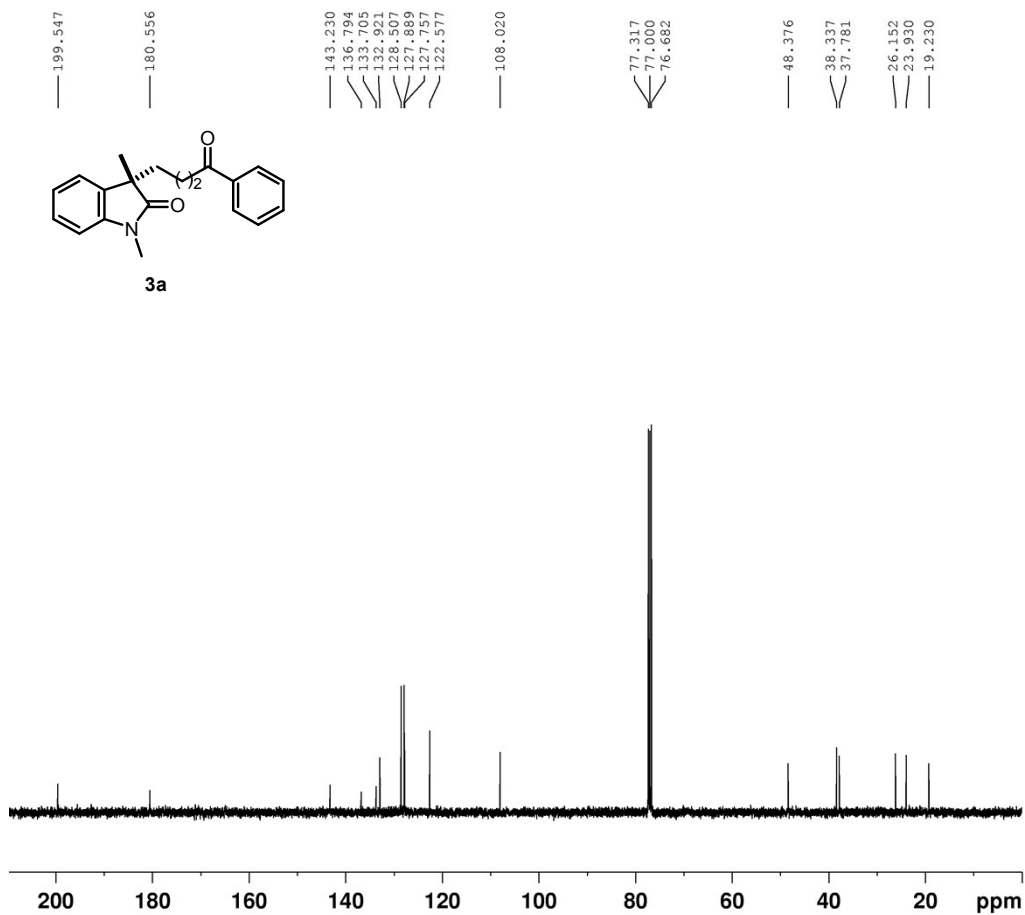

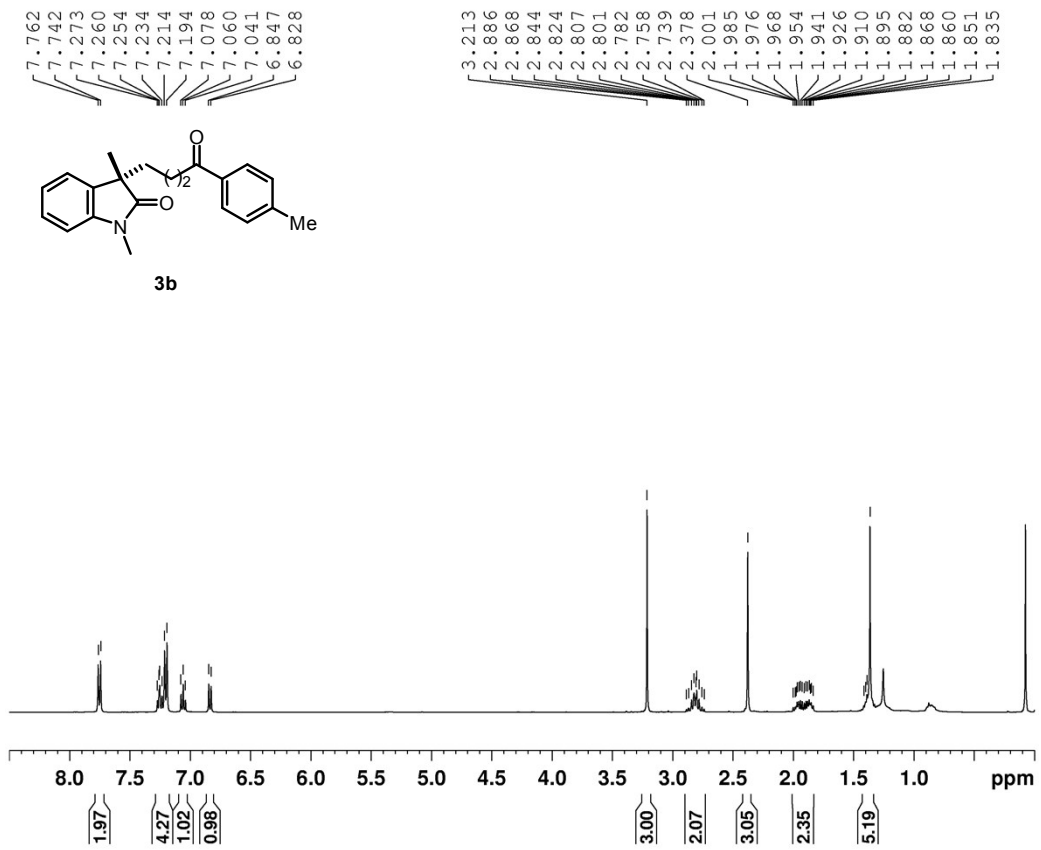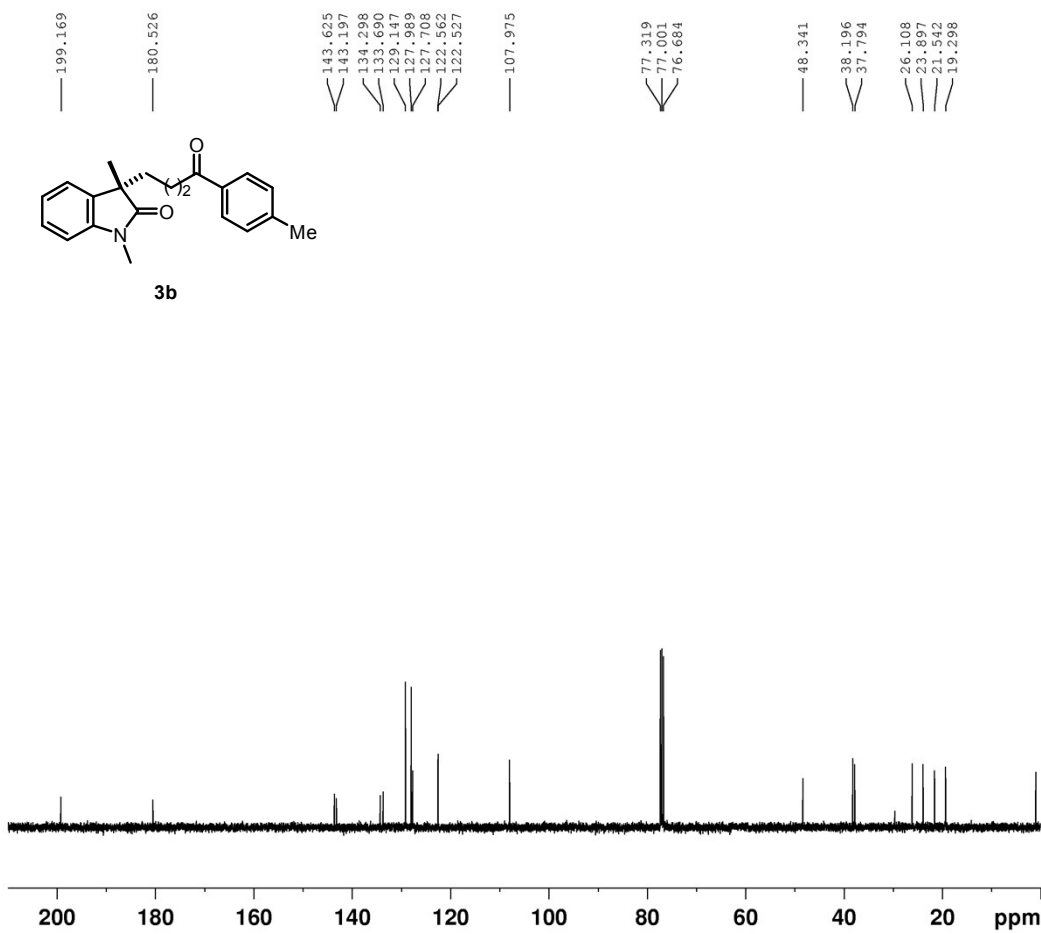

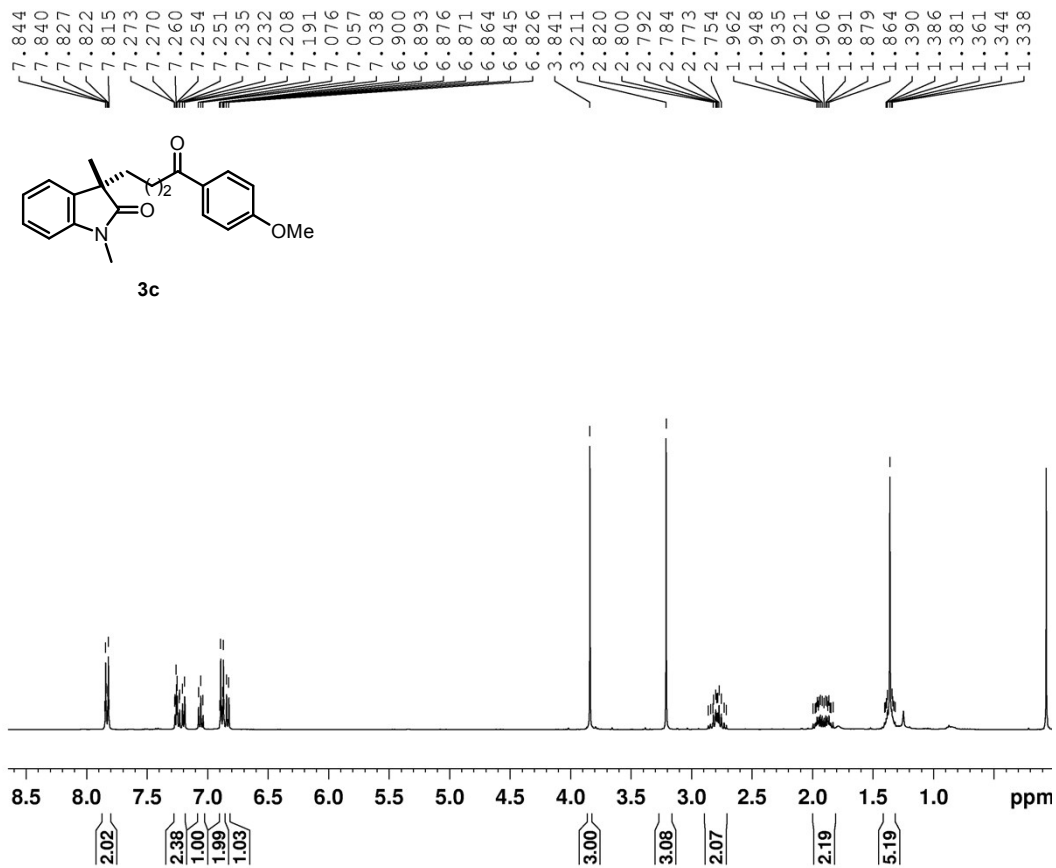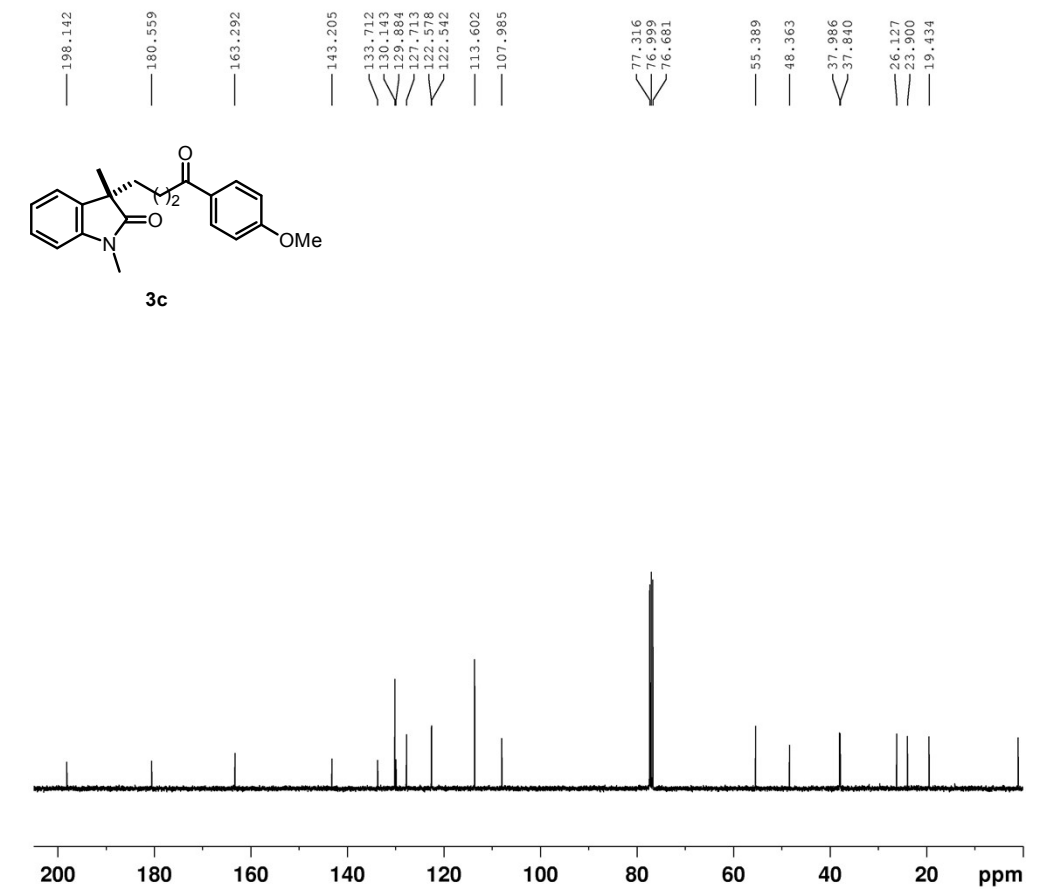



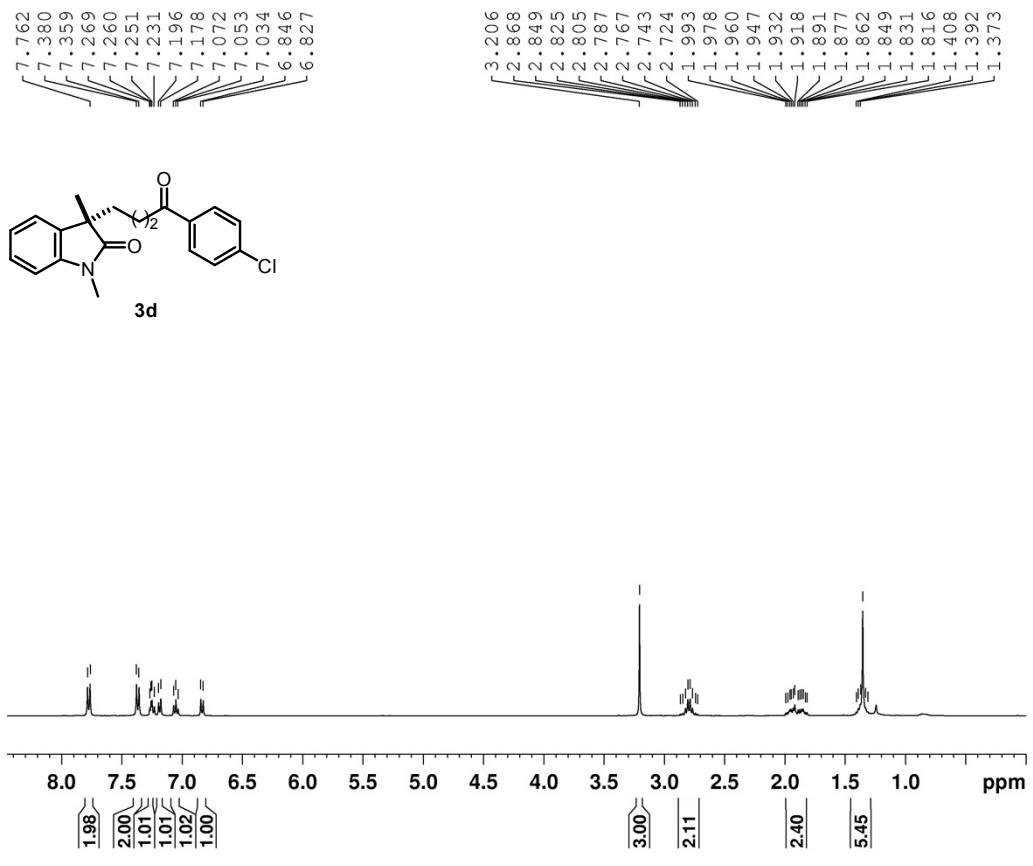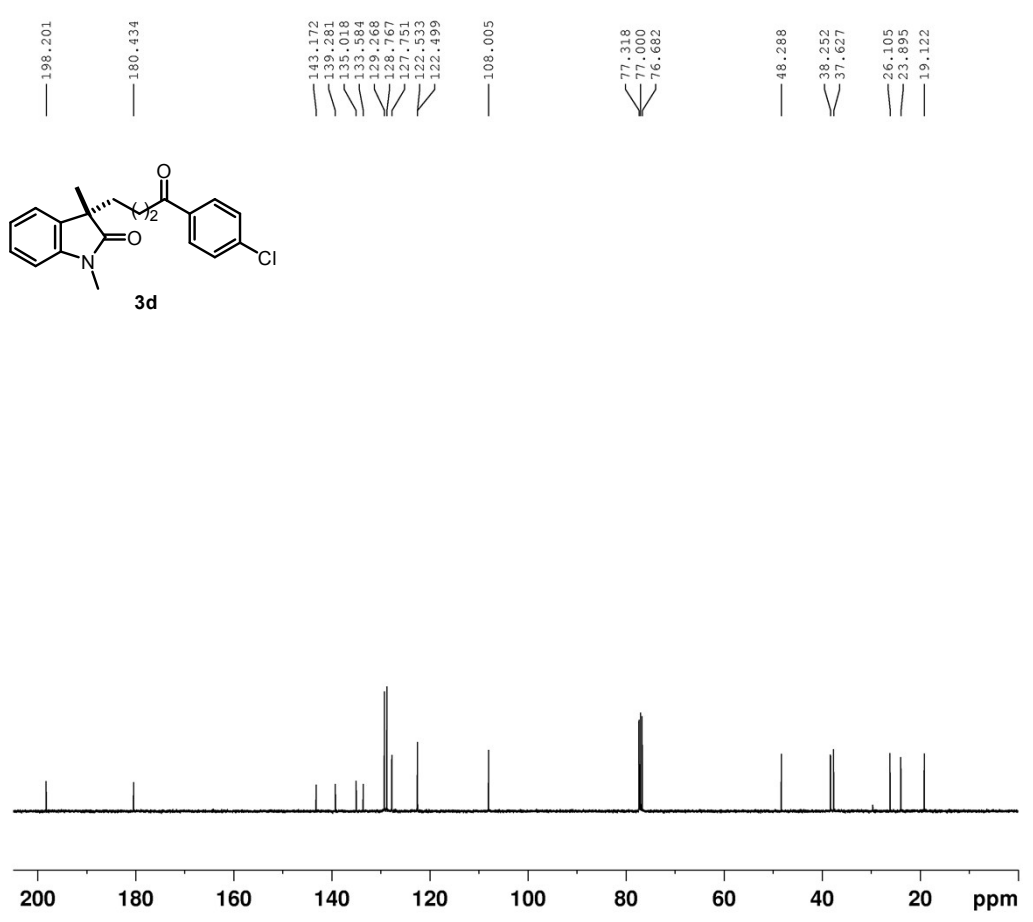

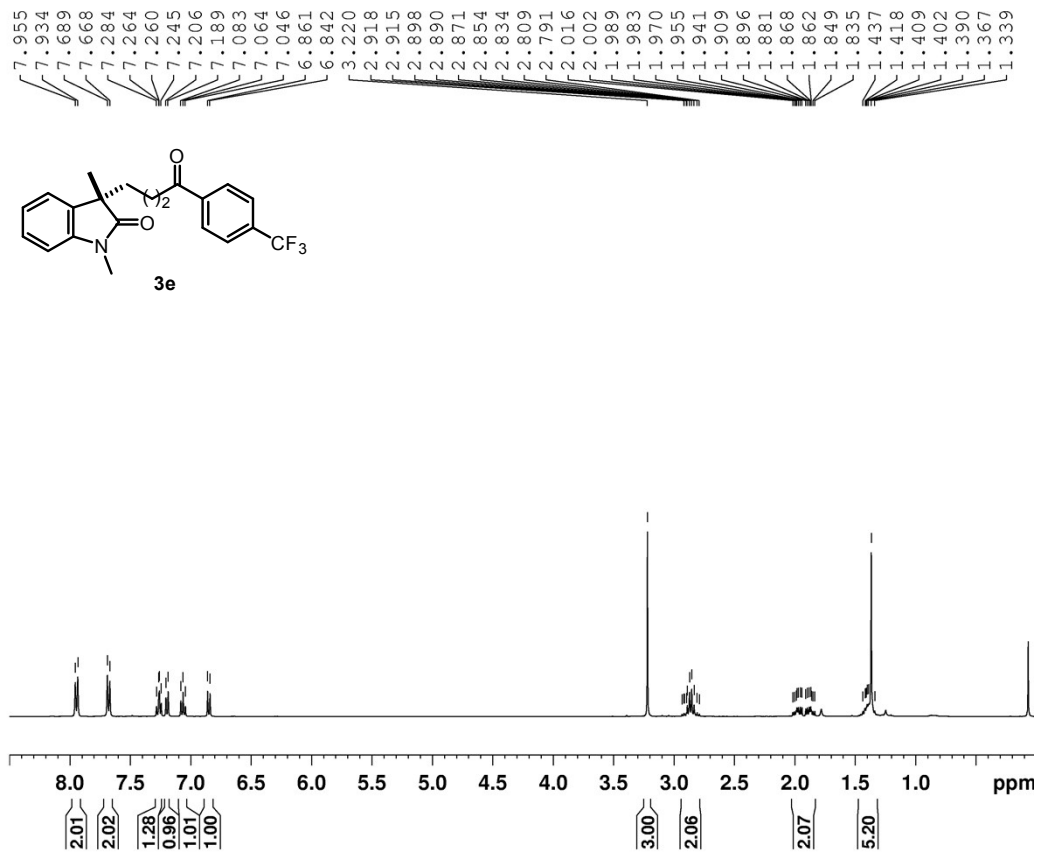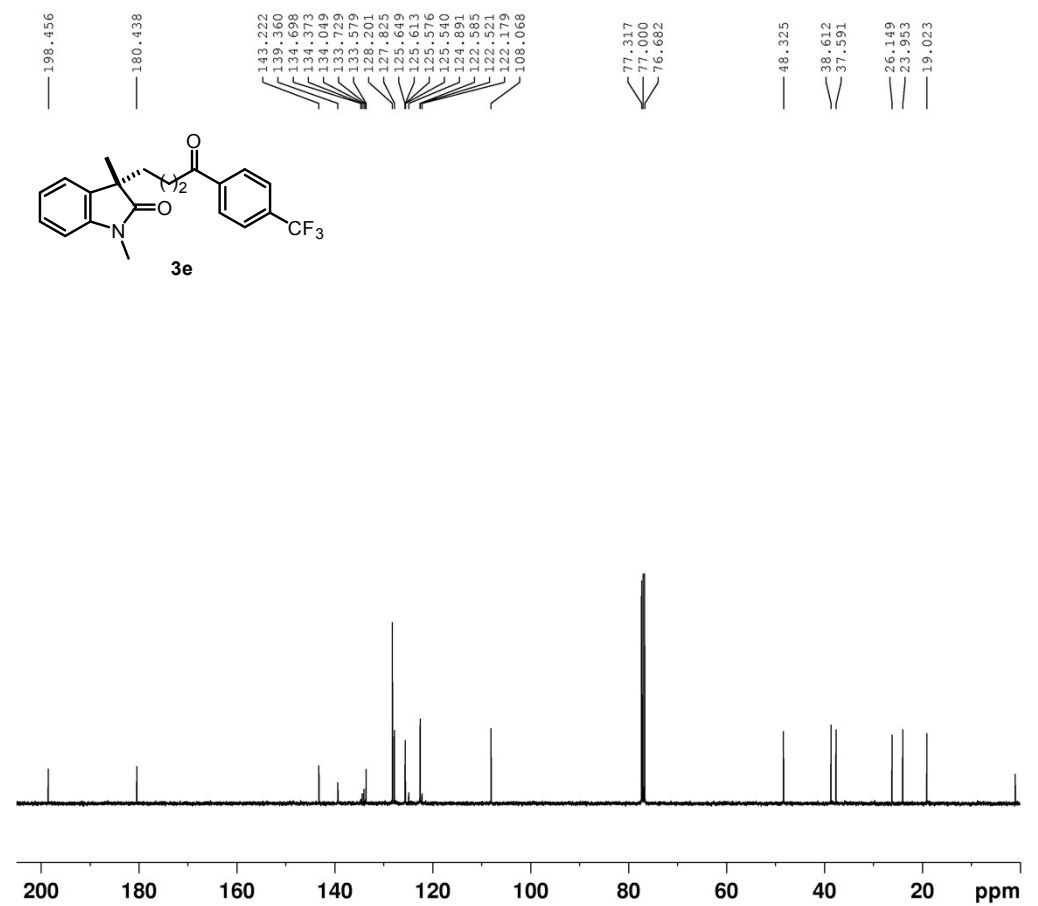

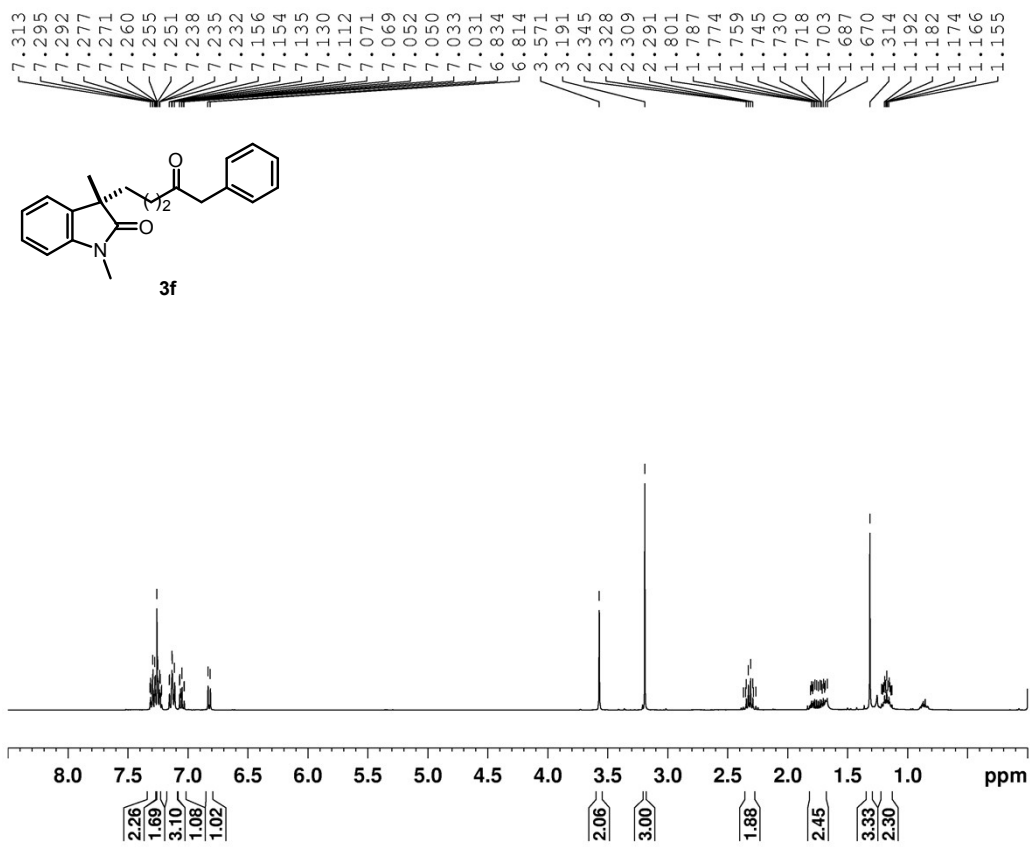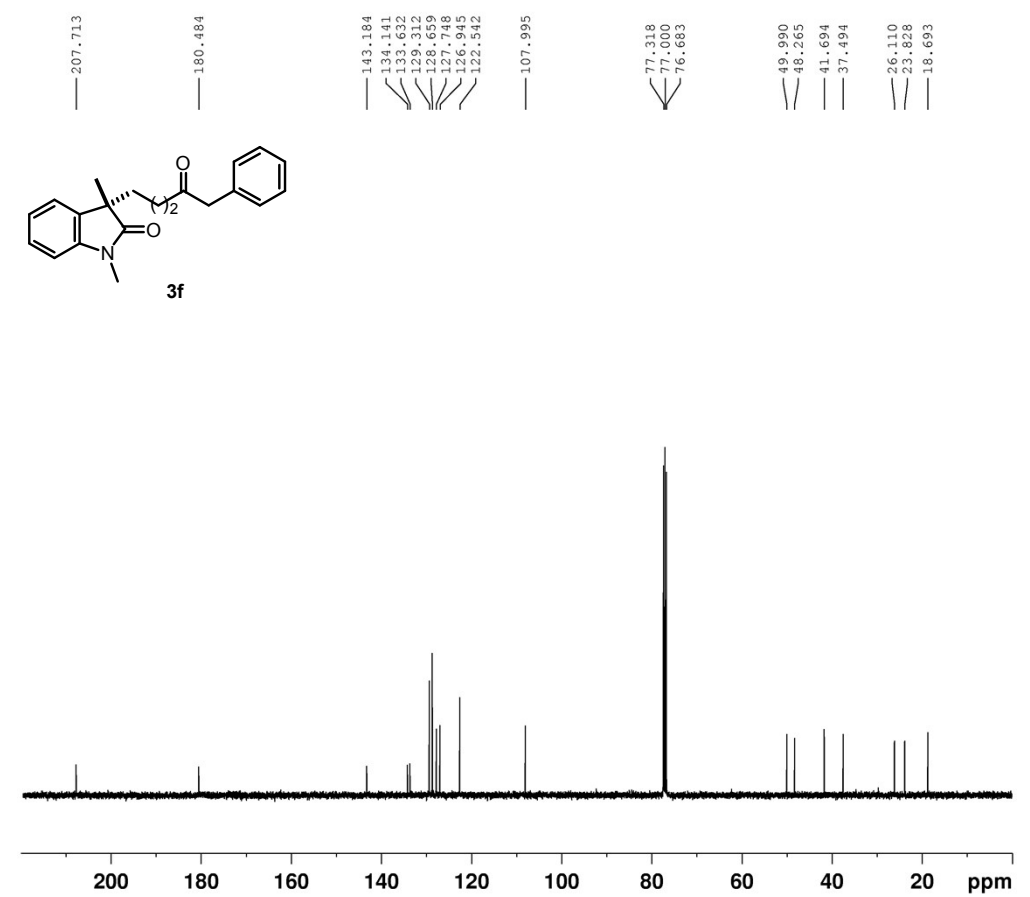

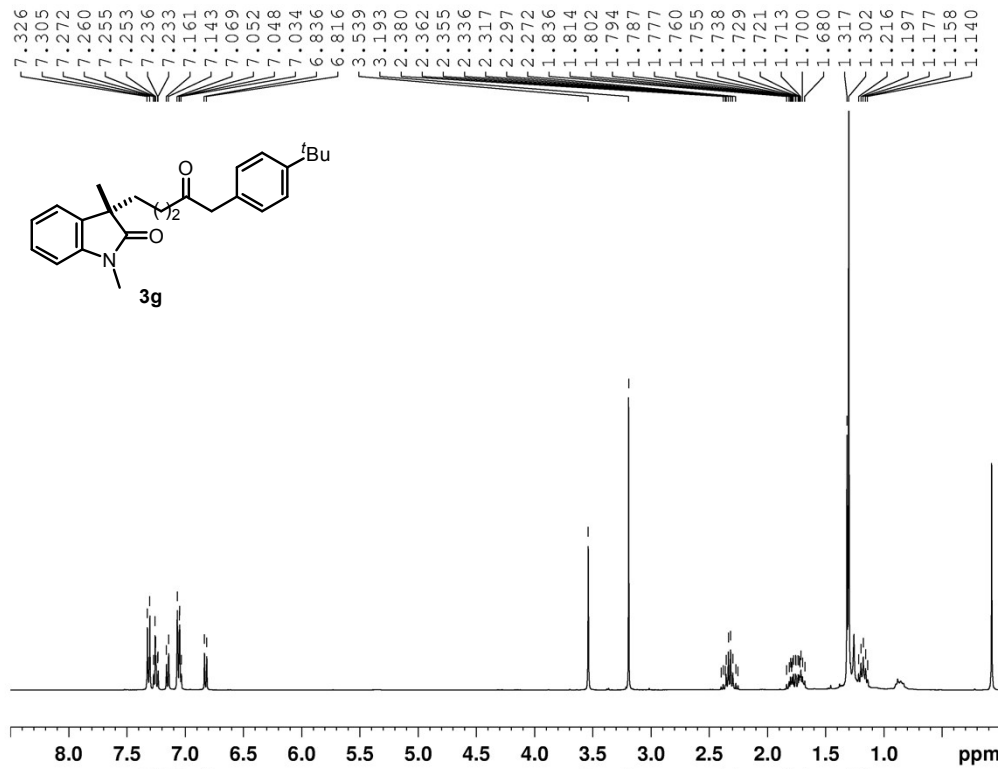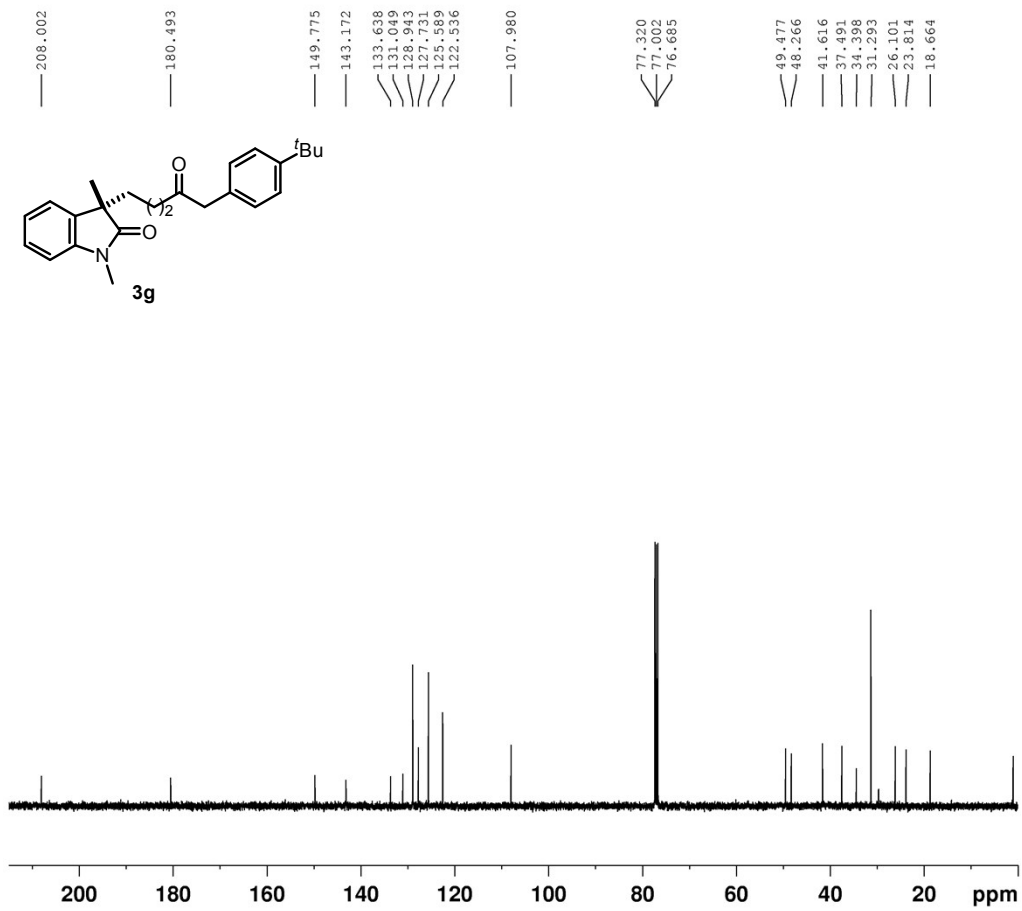

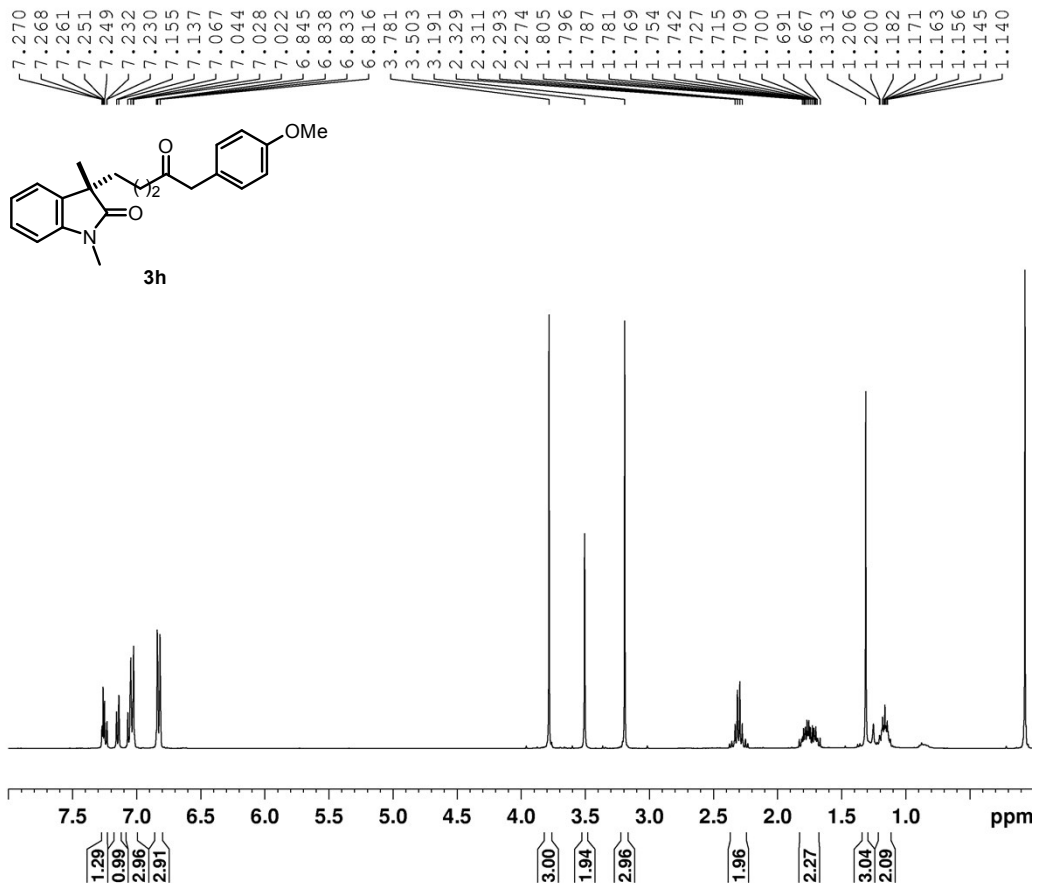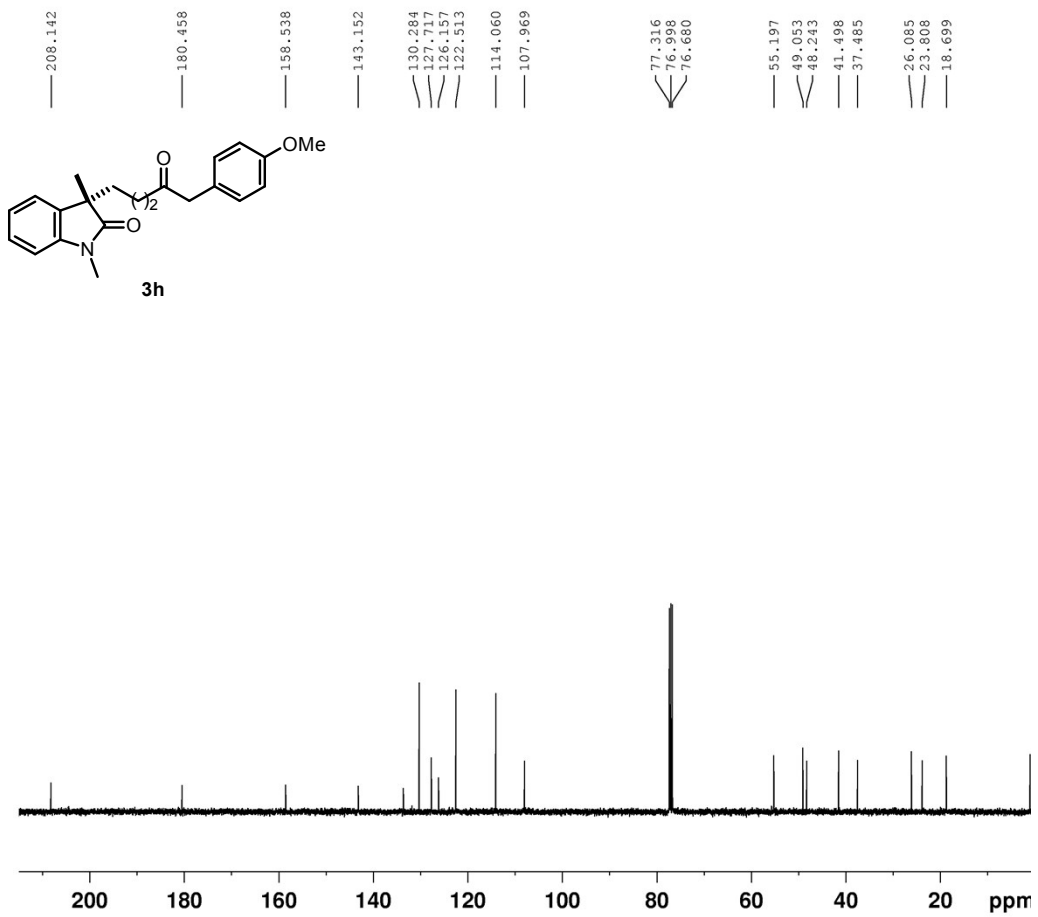

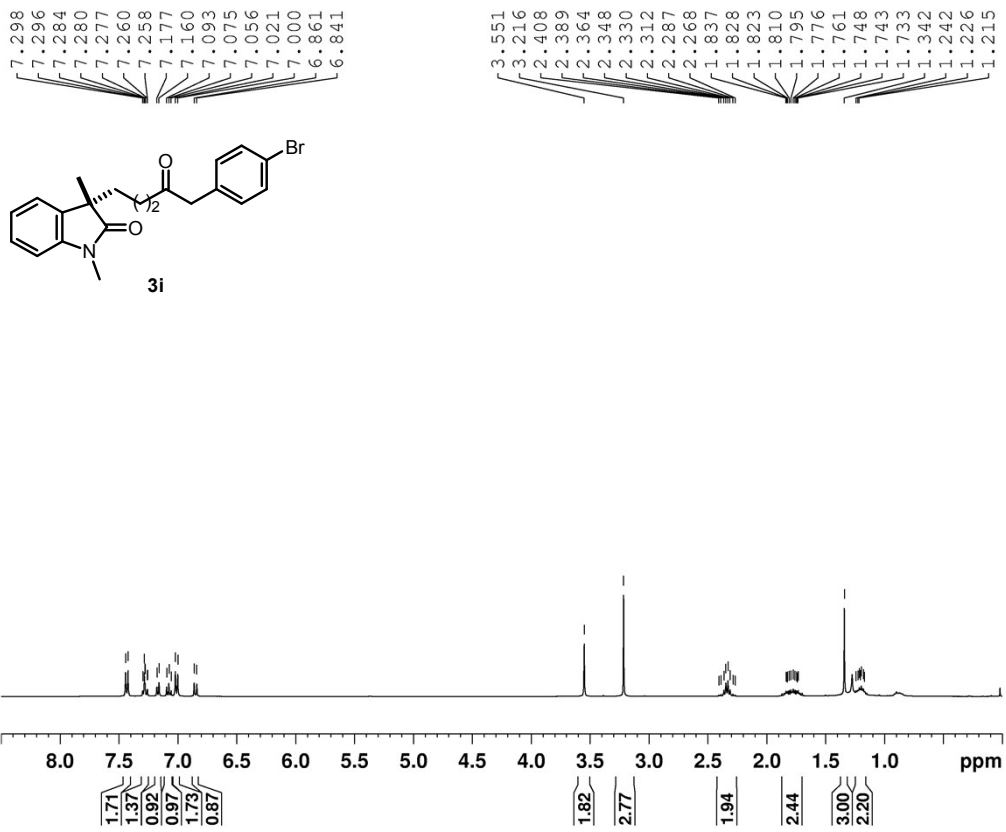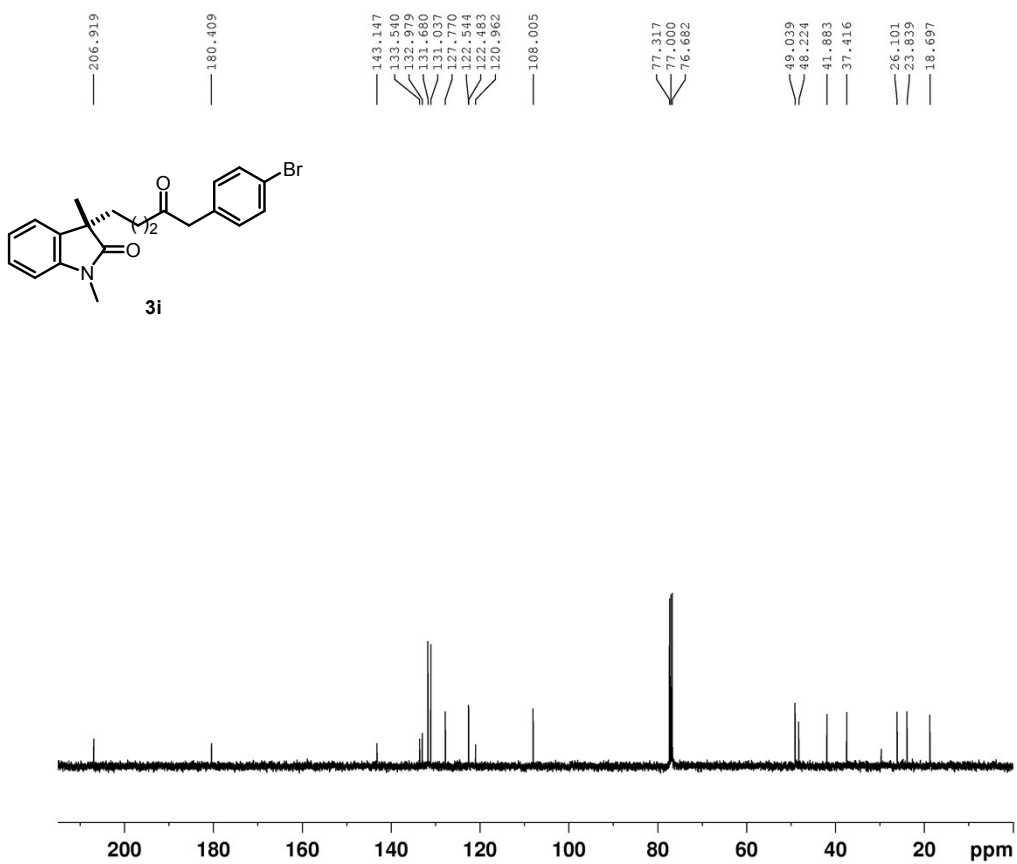

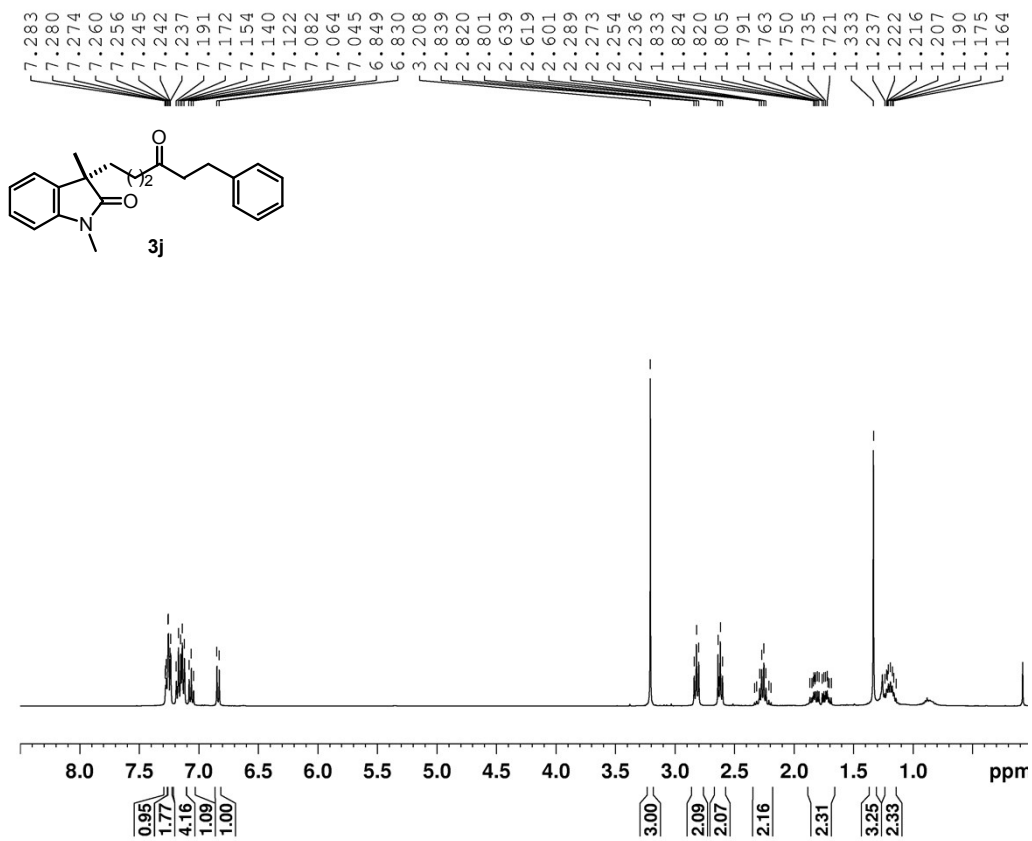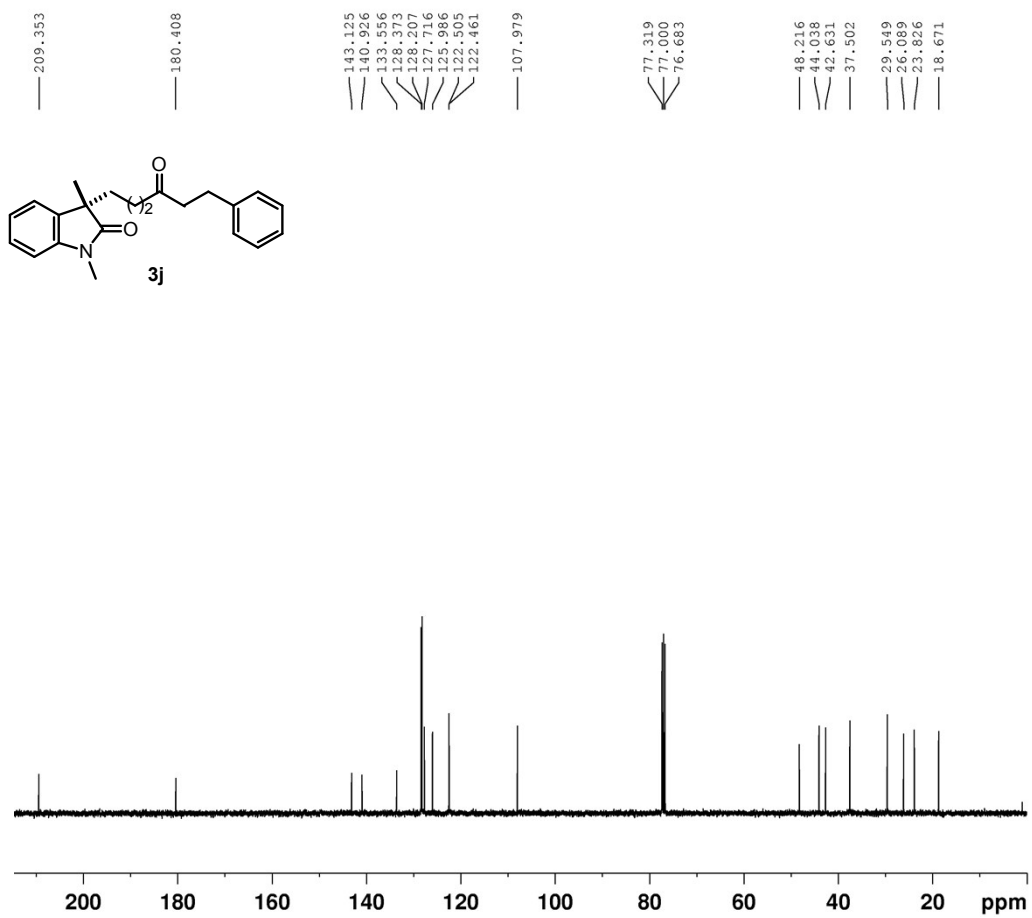

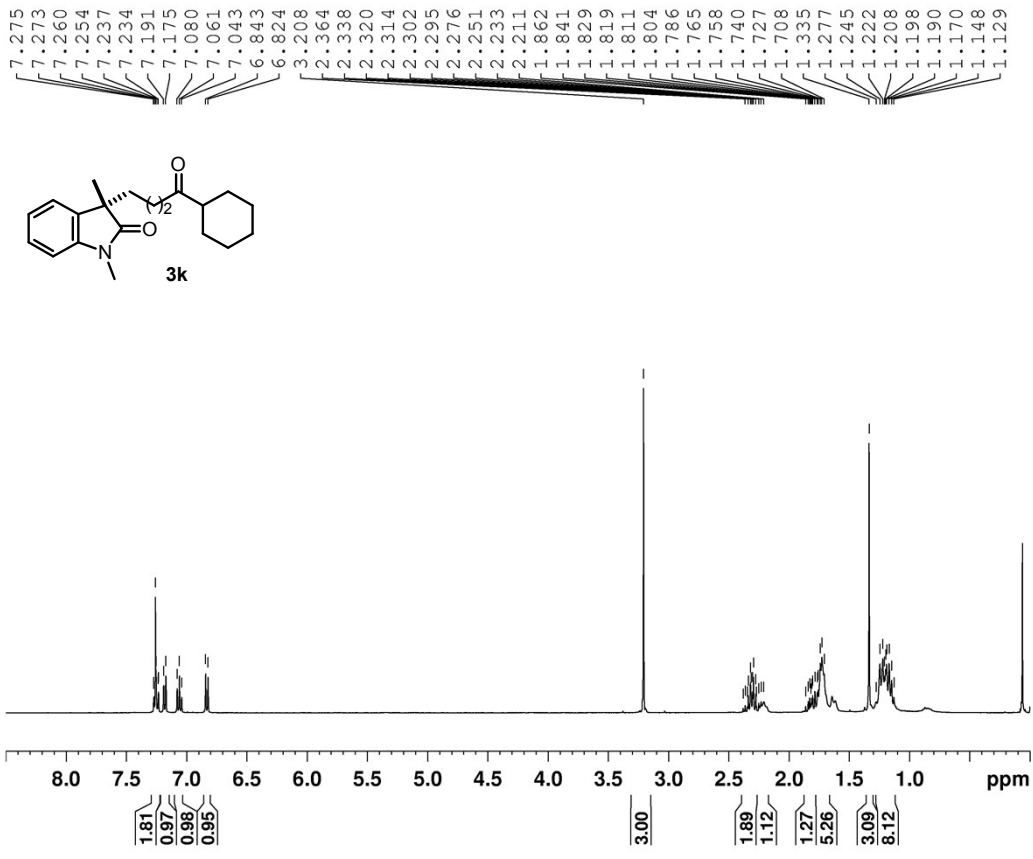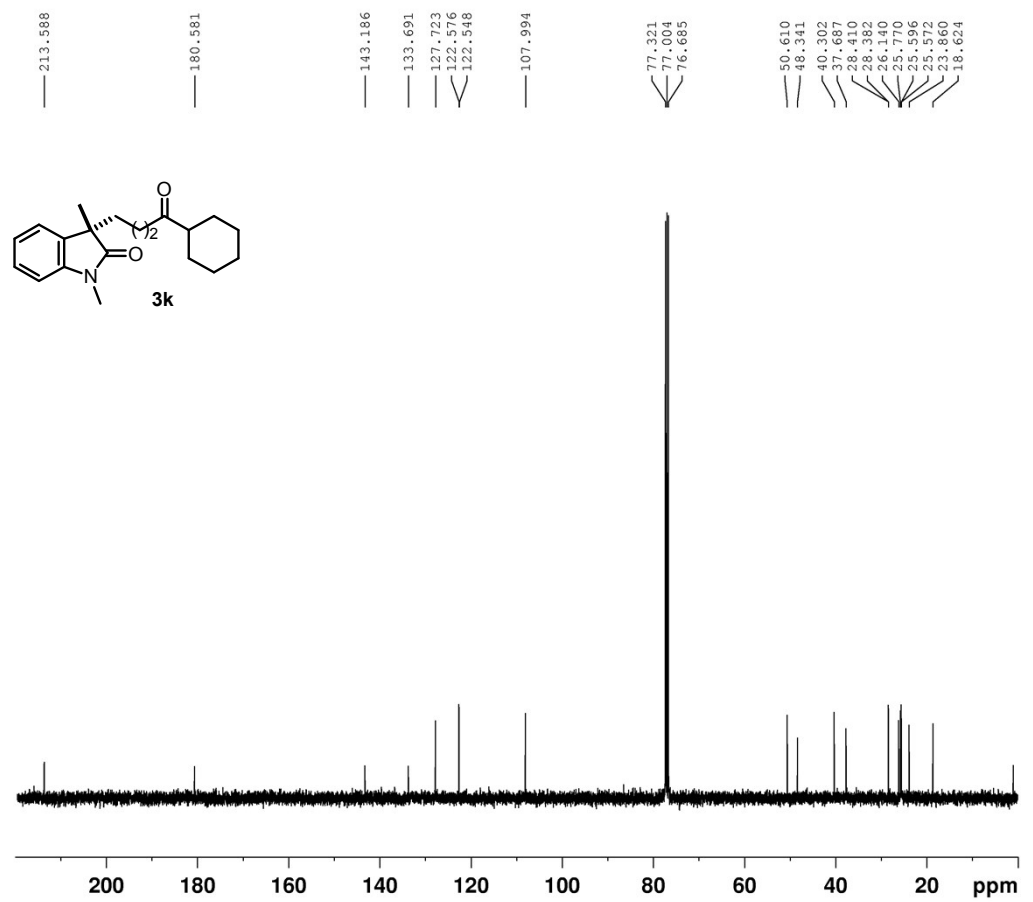



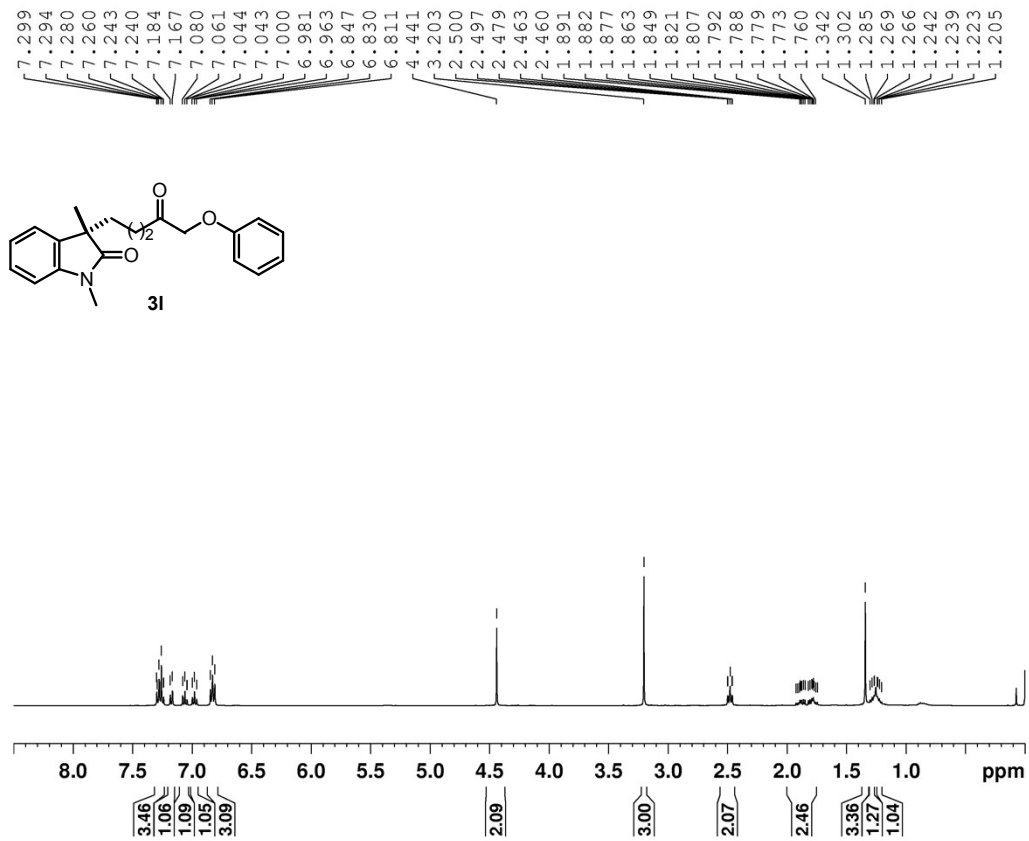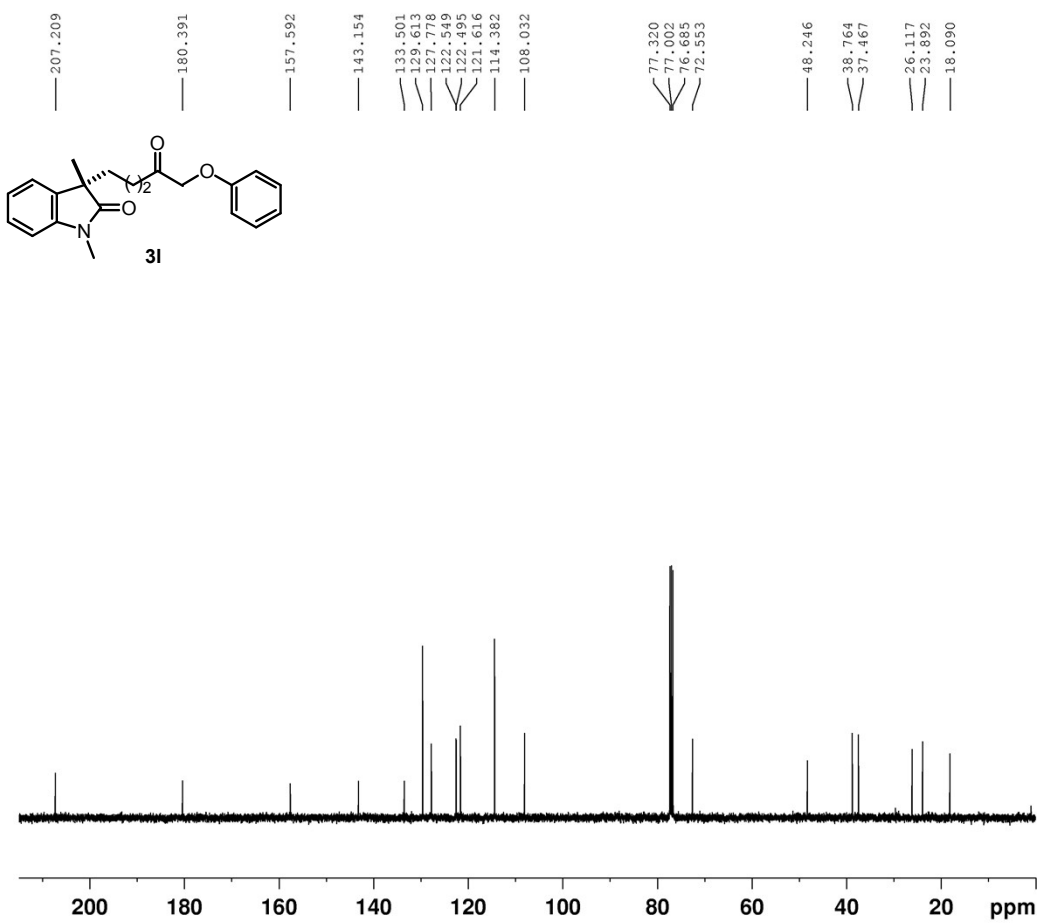

# <sup>1</sup>H NMR and <sup>13</sup>C NMR Spectra of Products 4

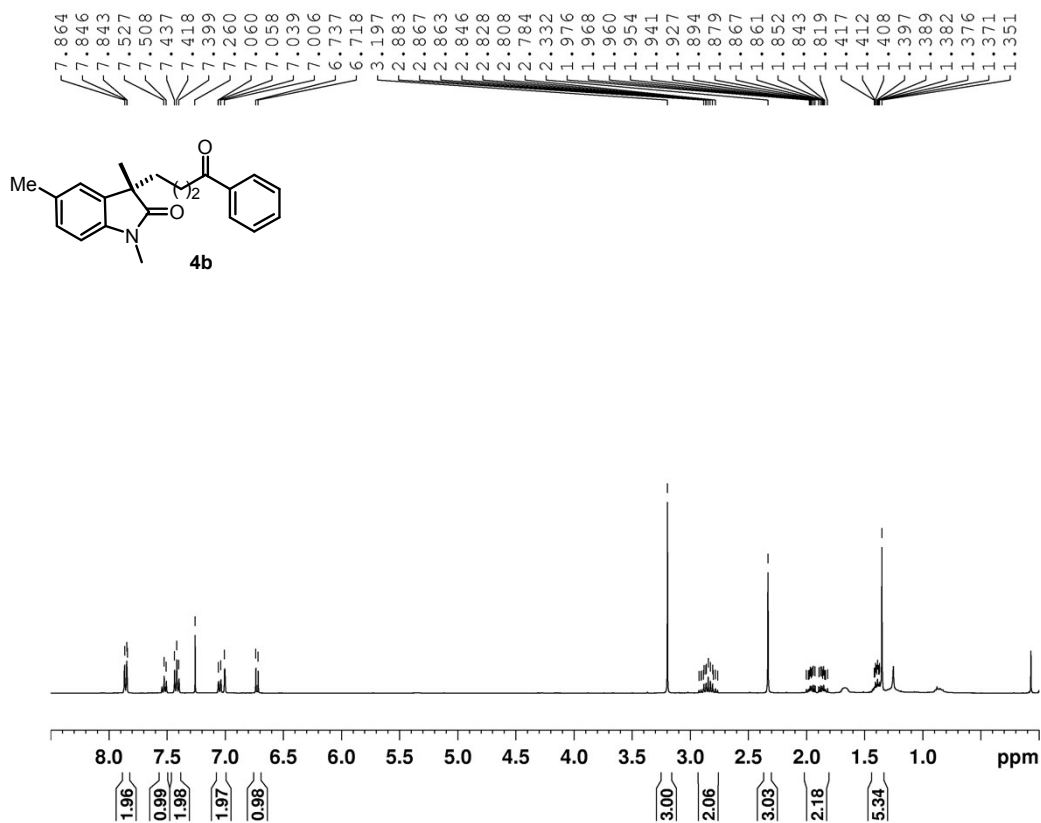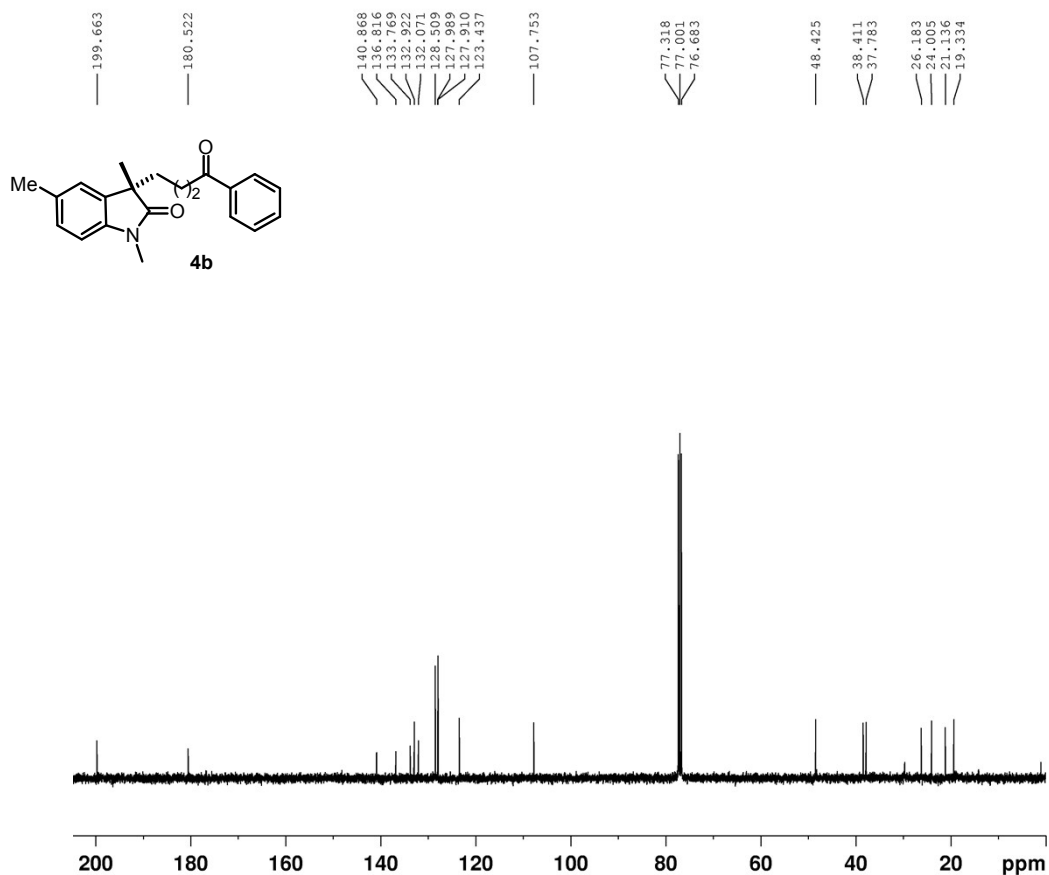

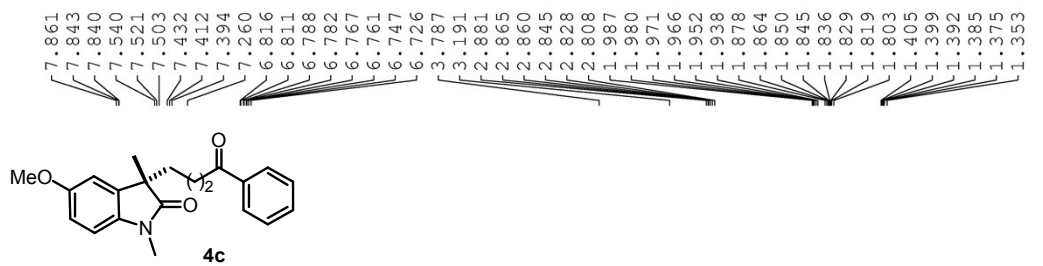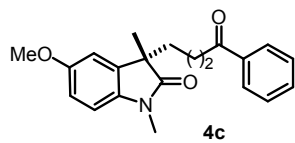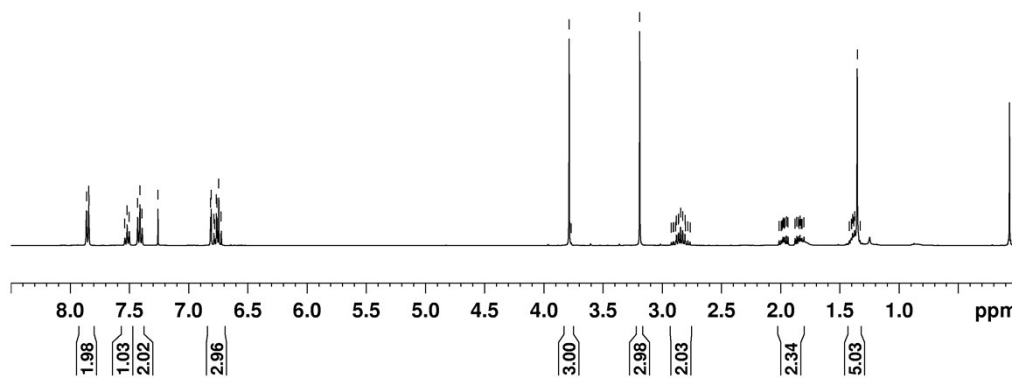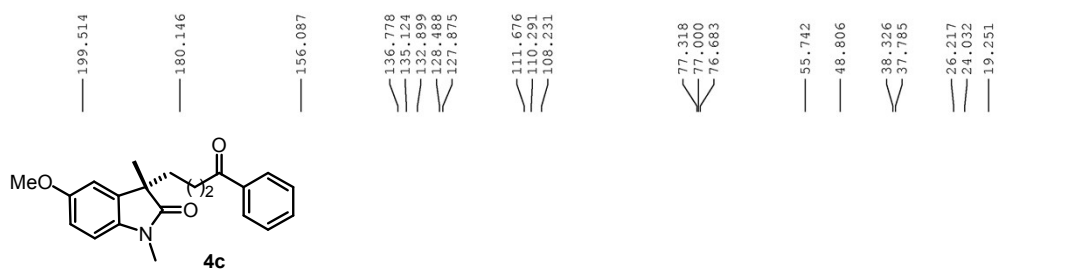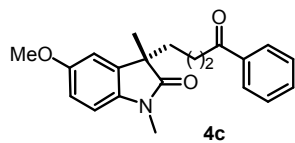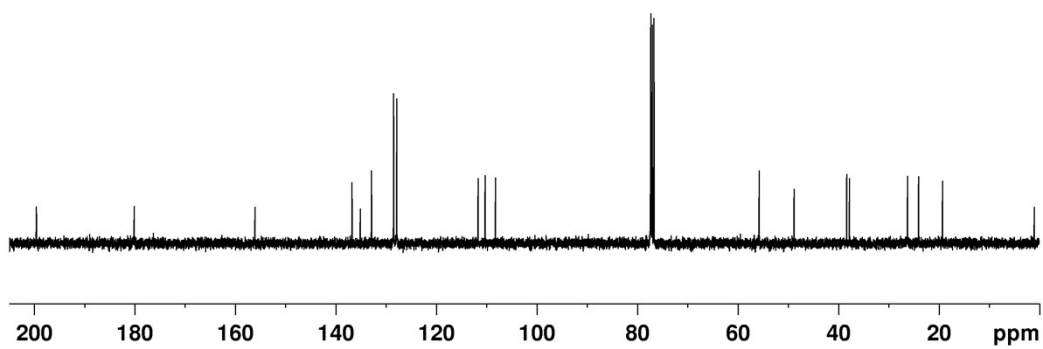

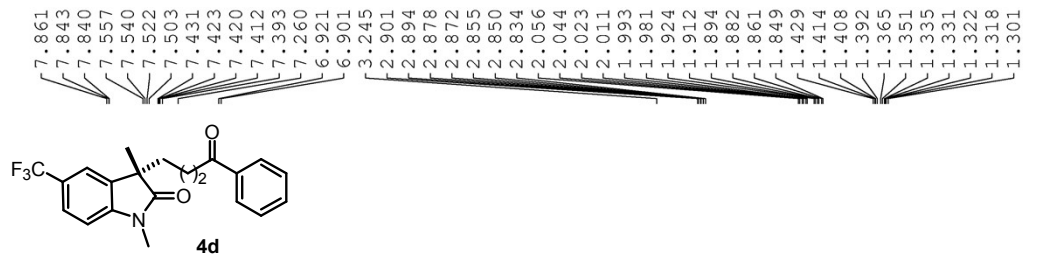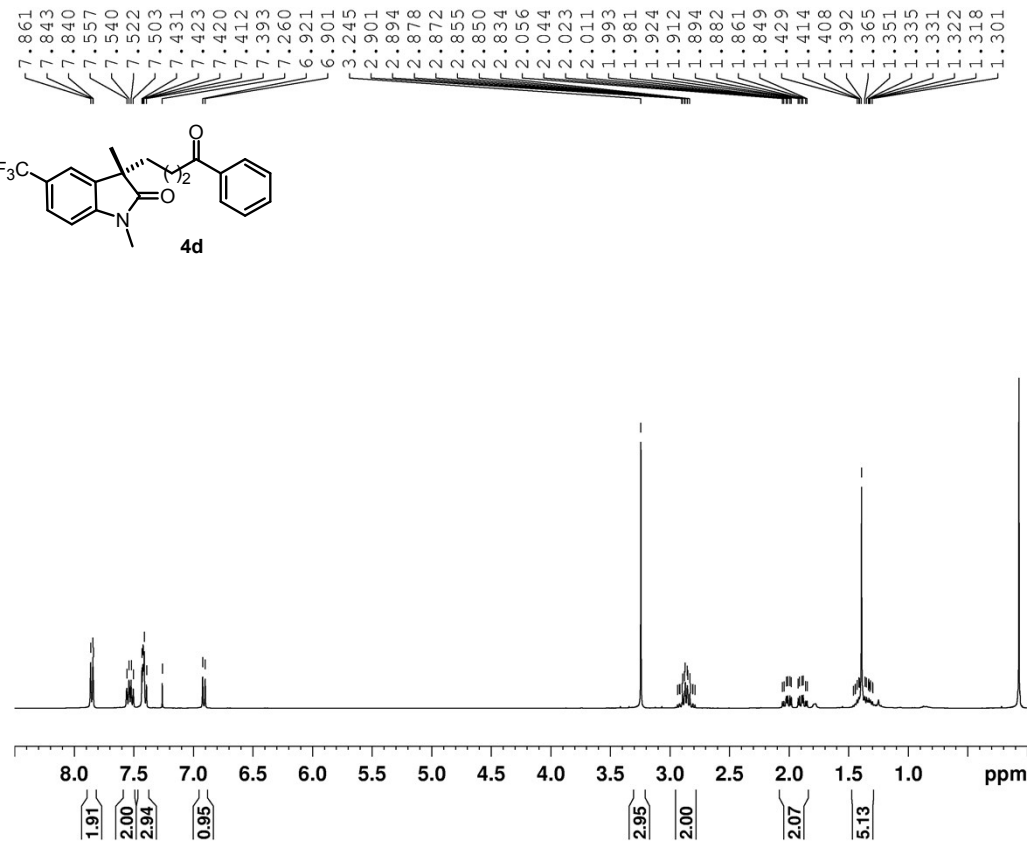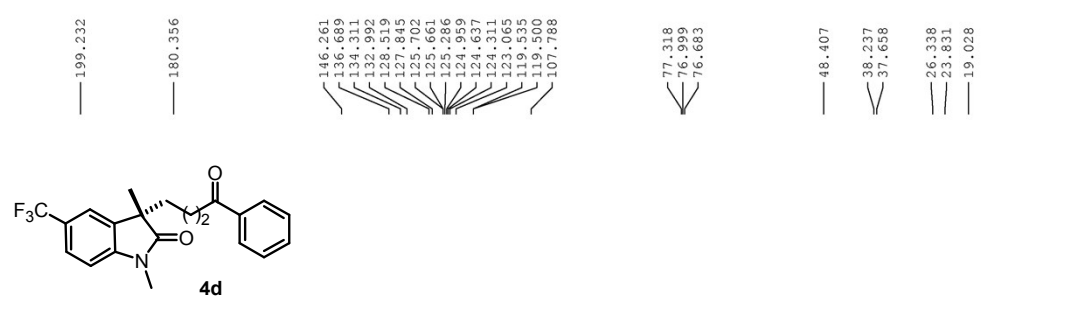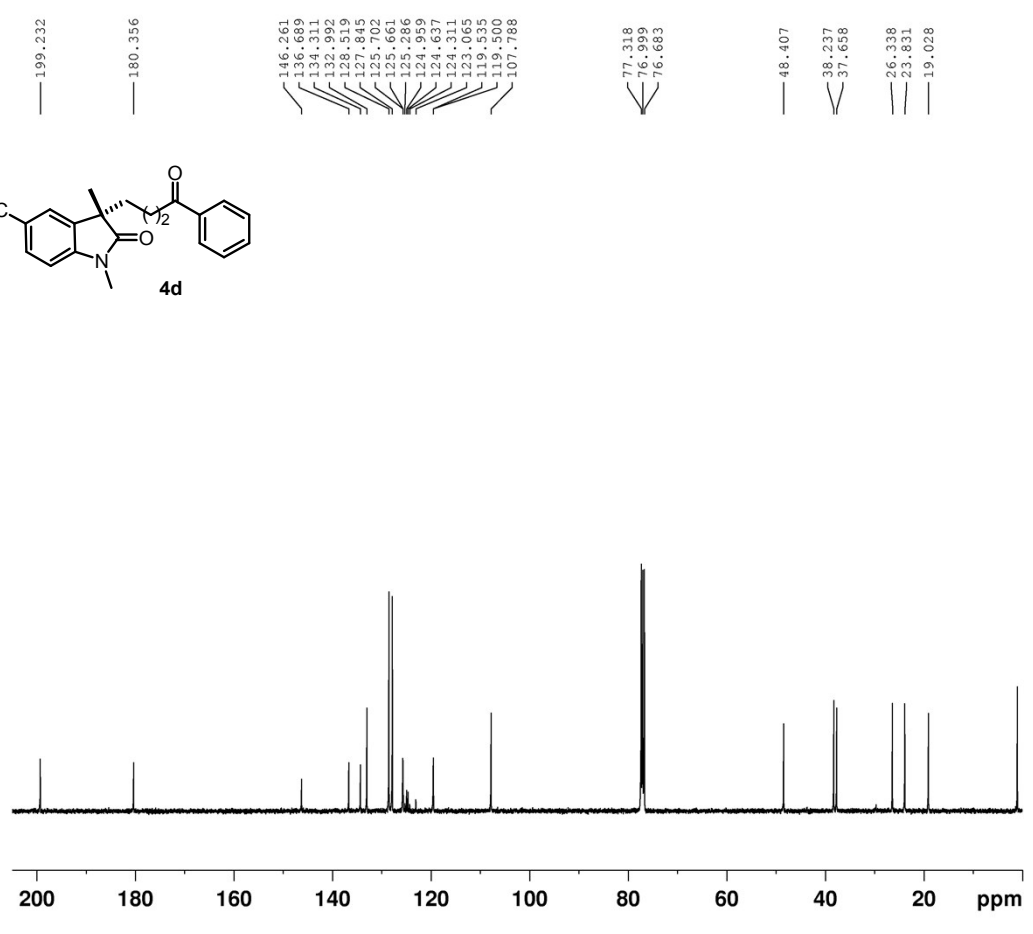

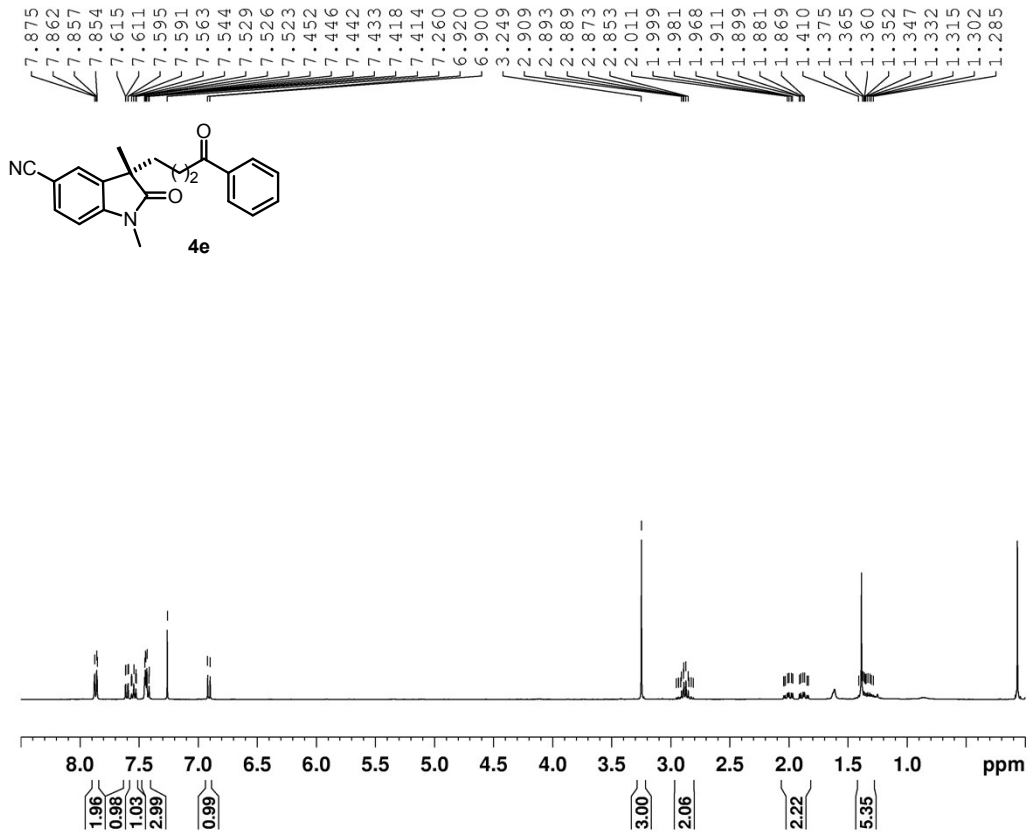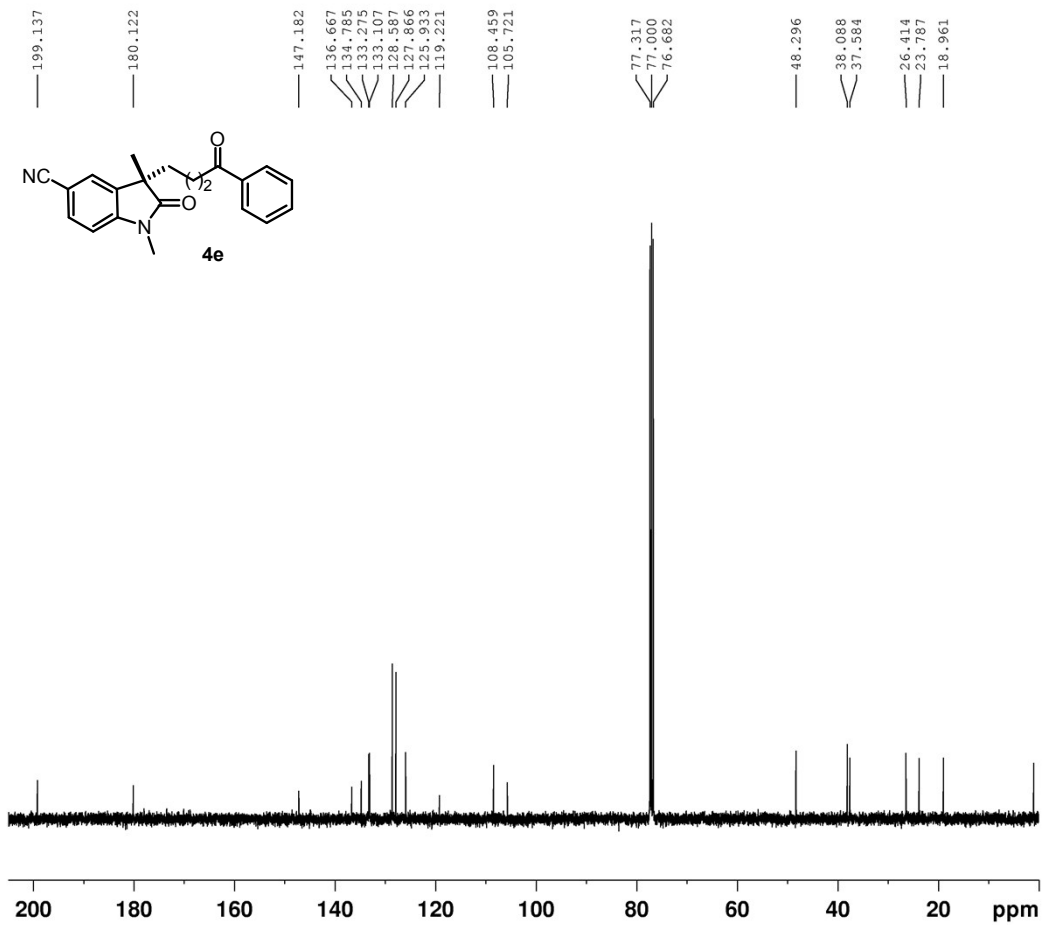

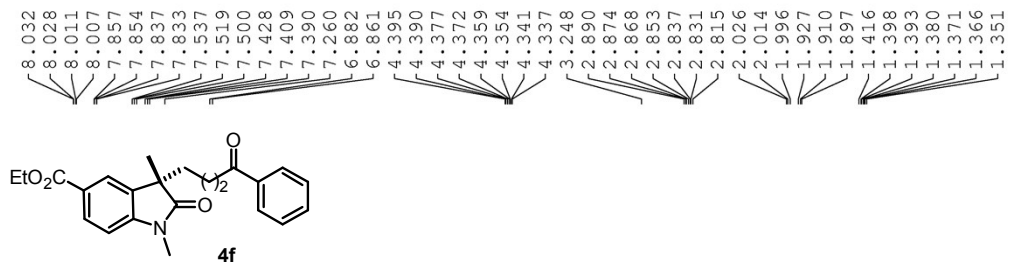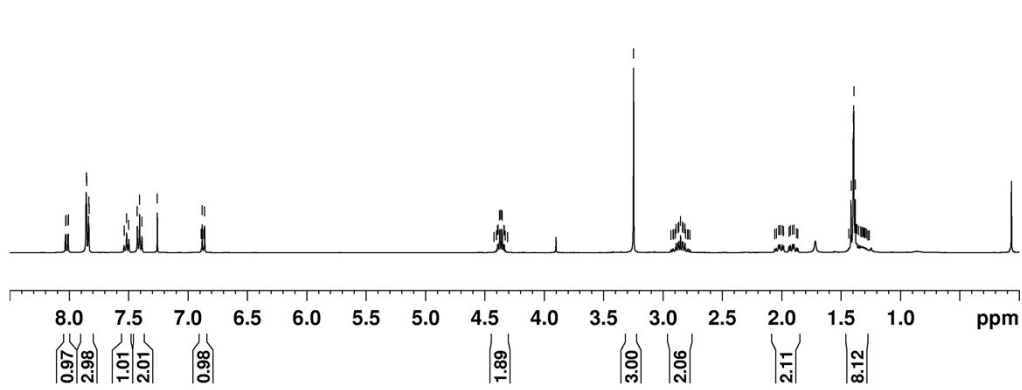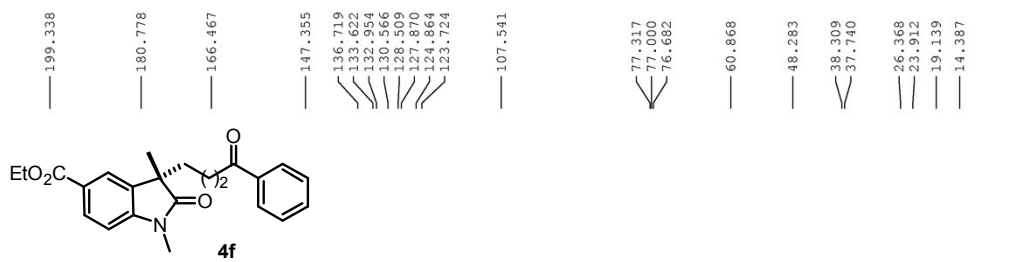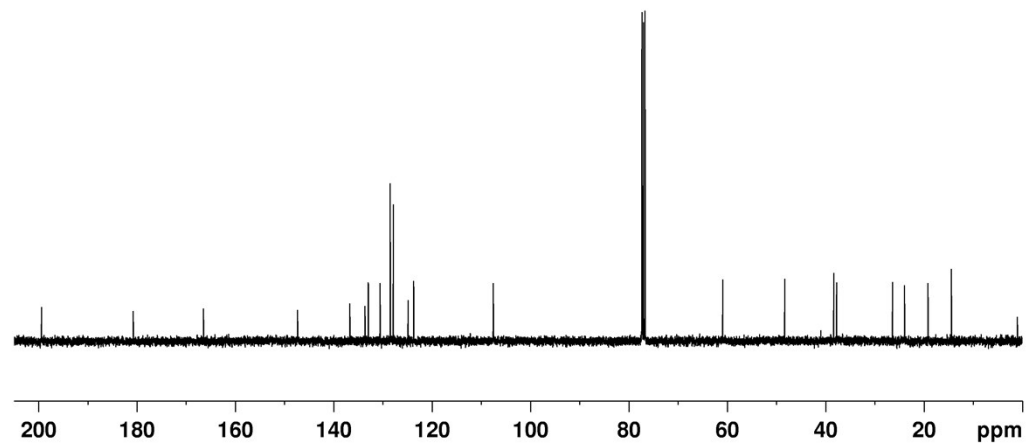

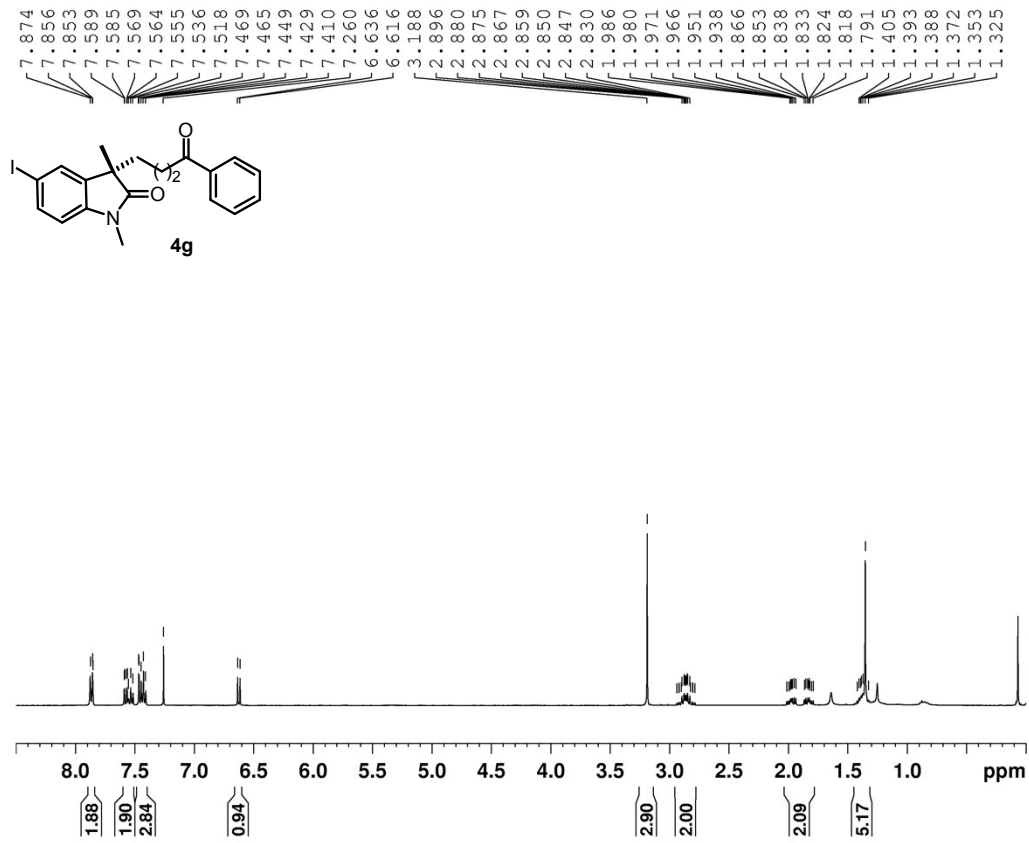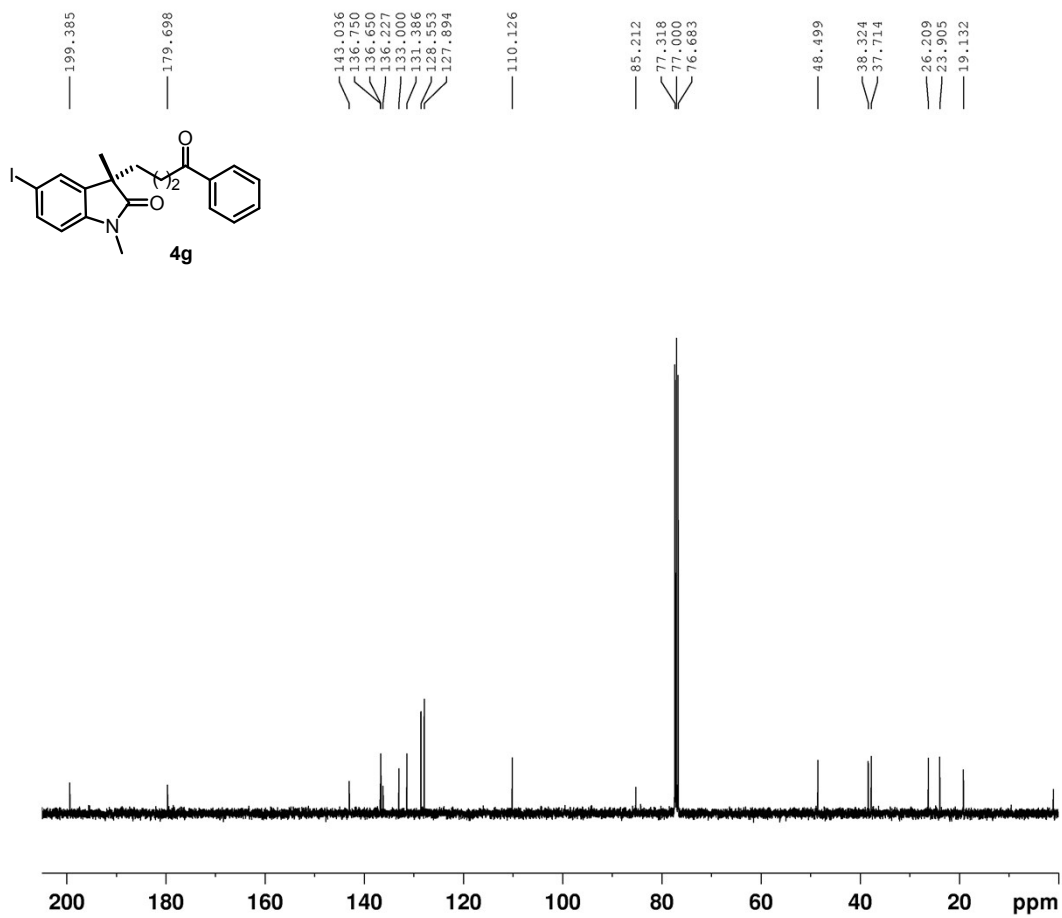

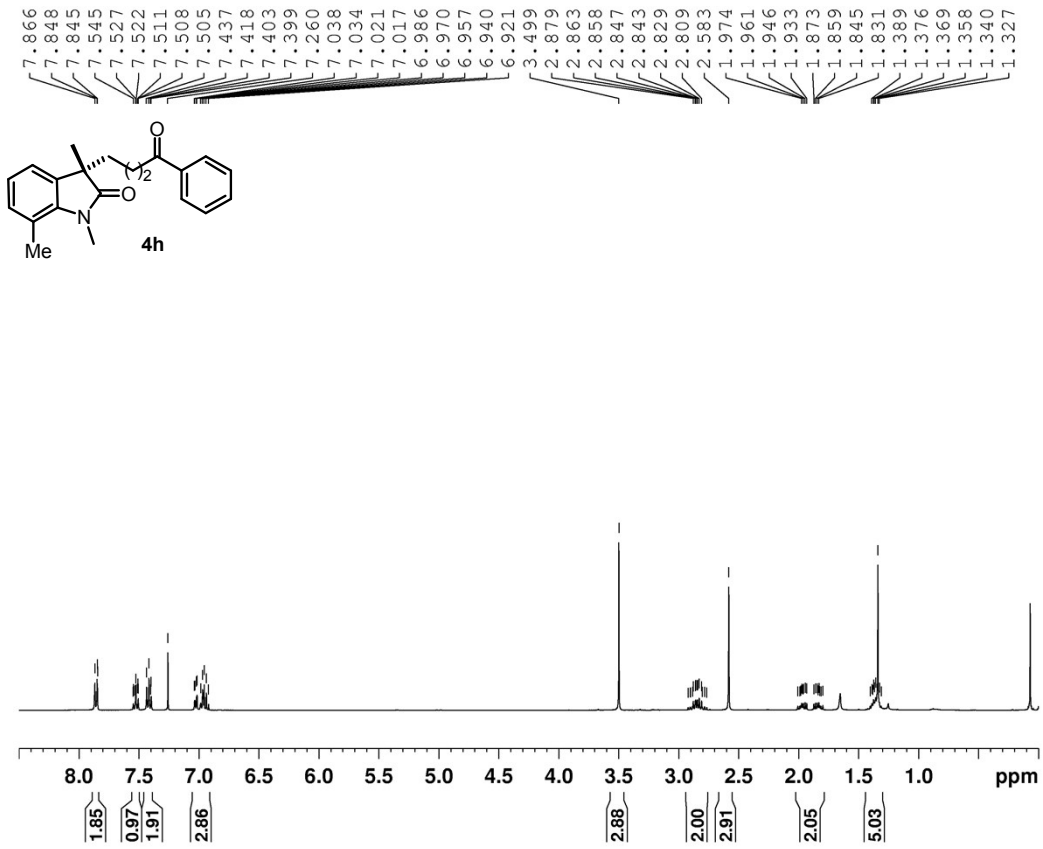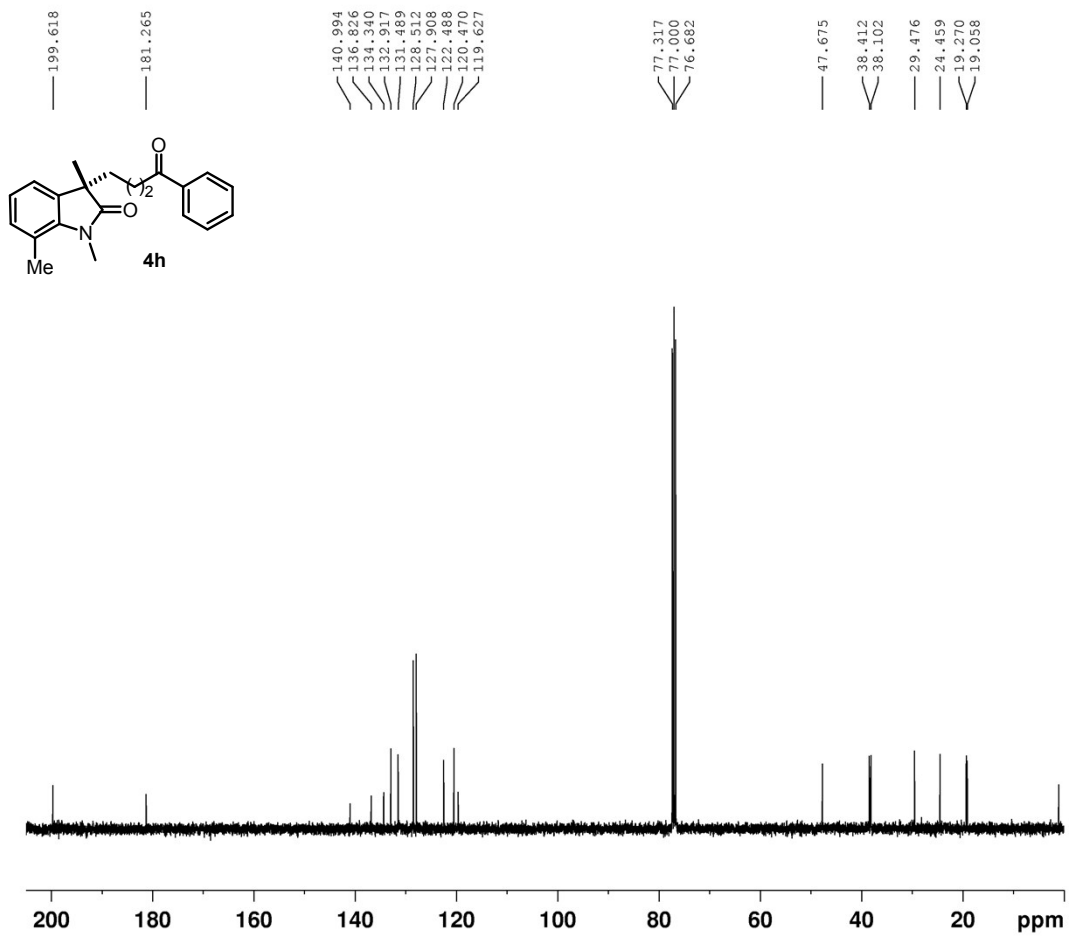



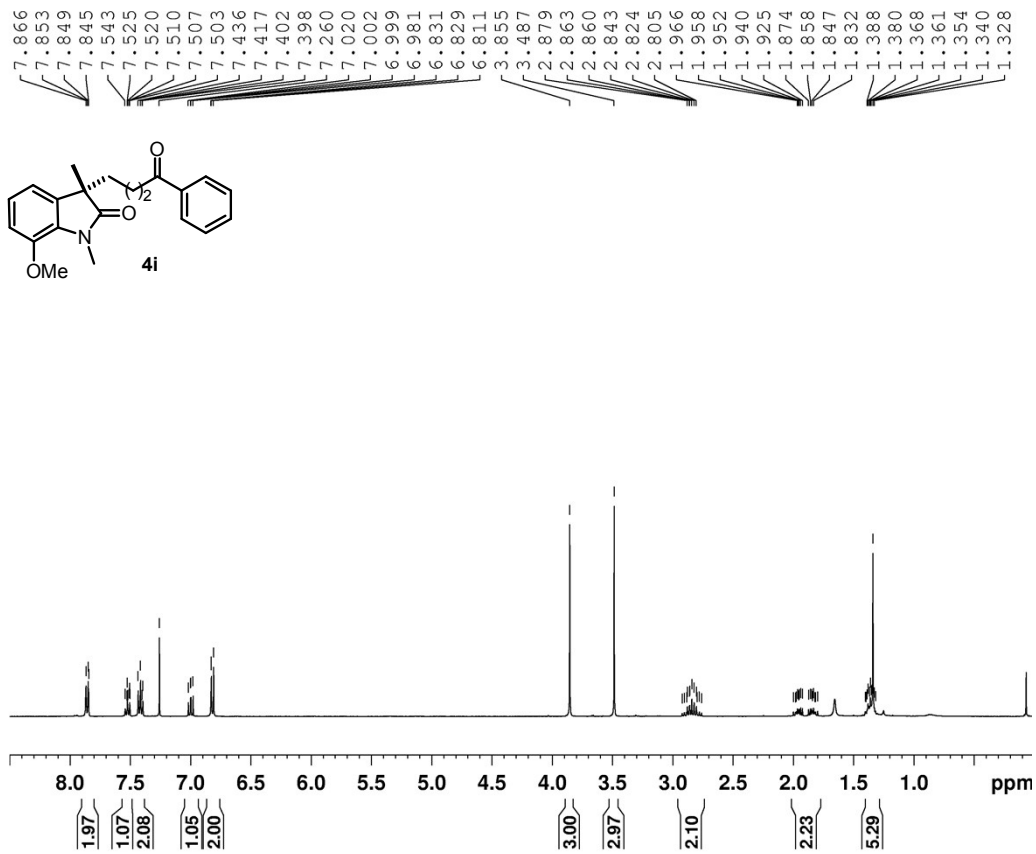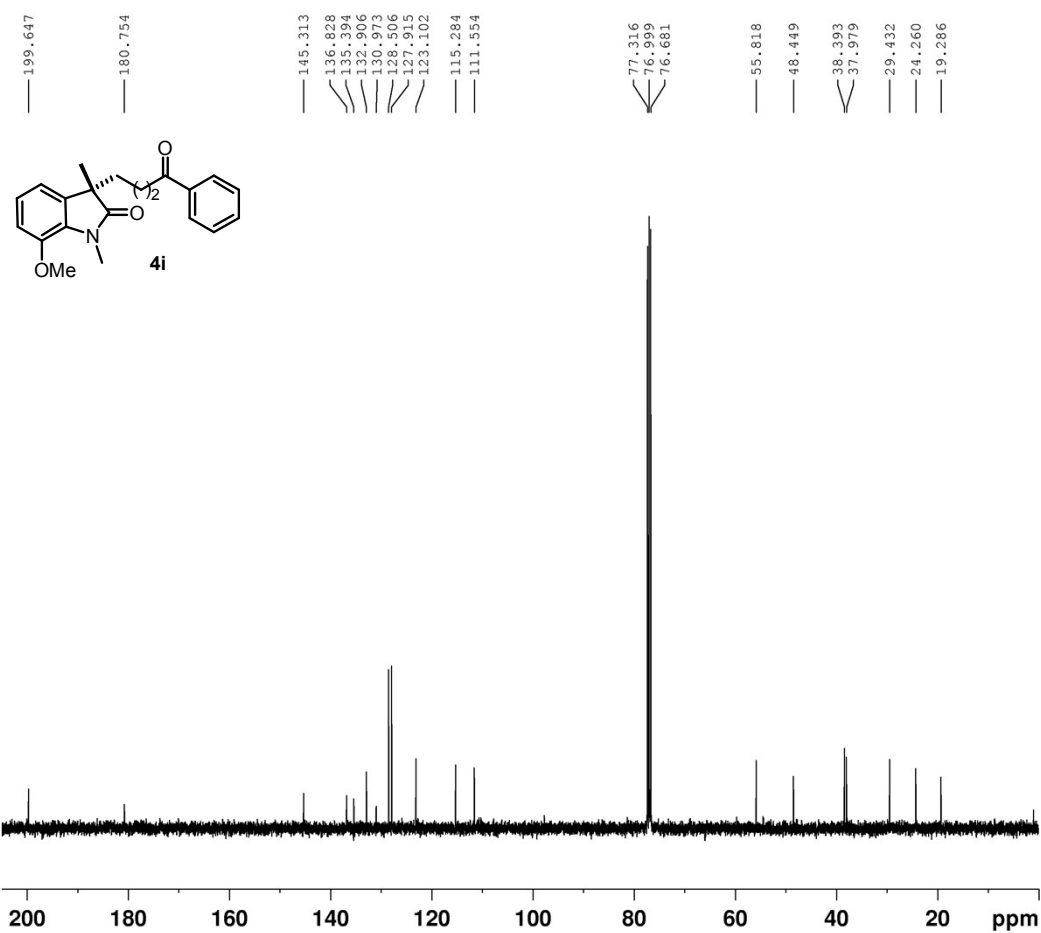

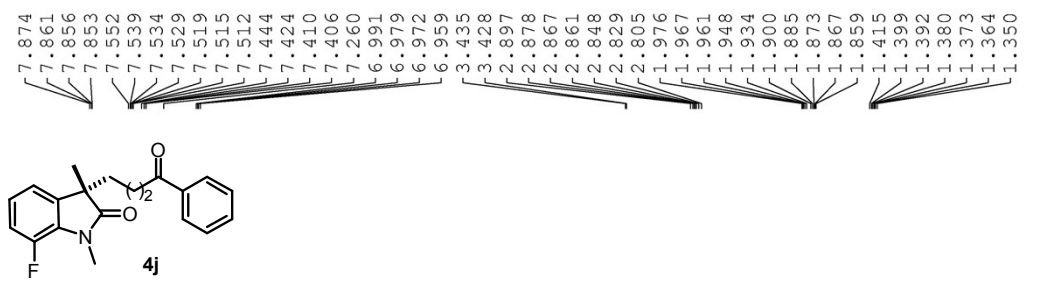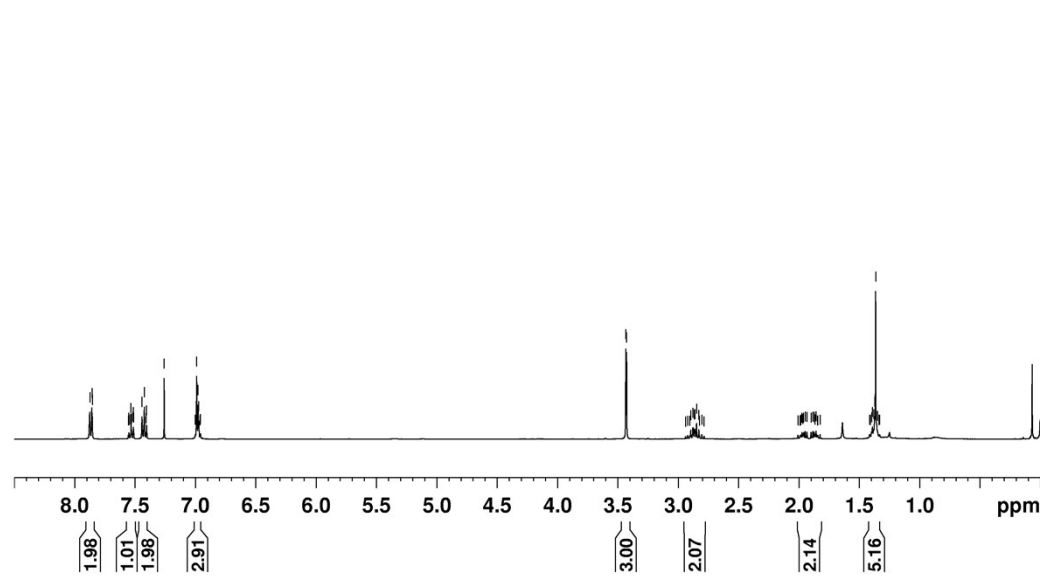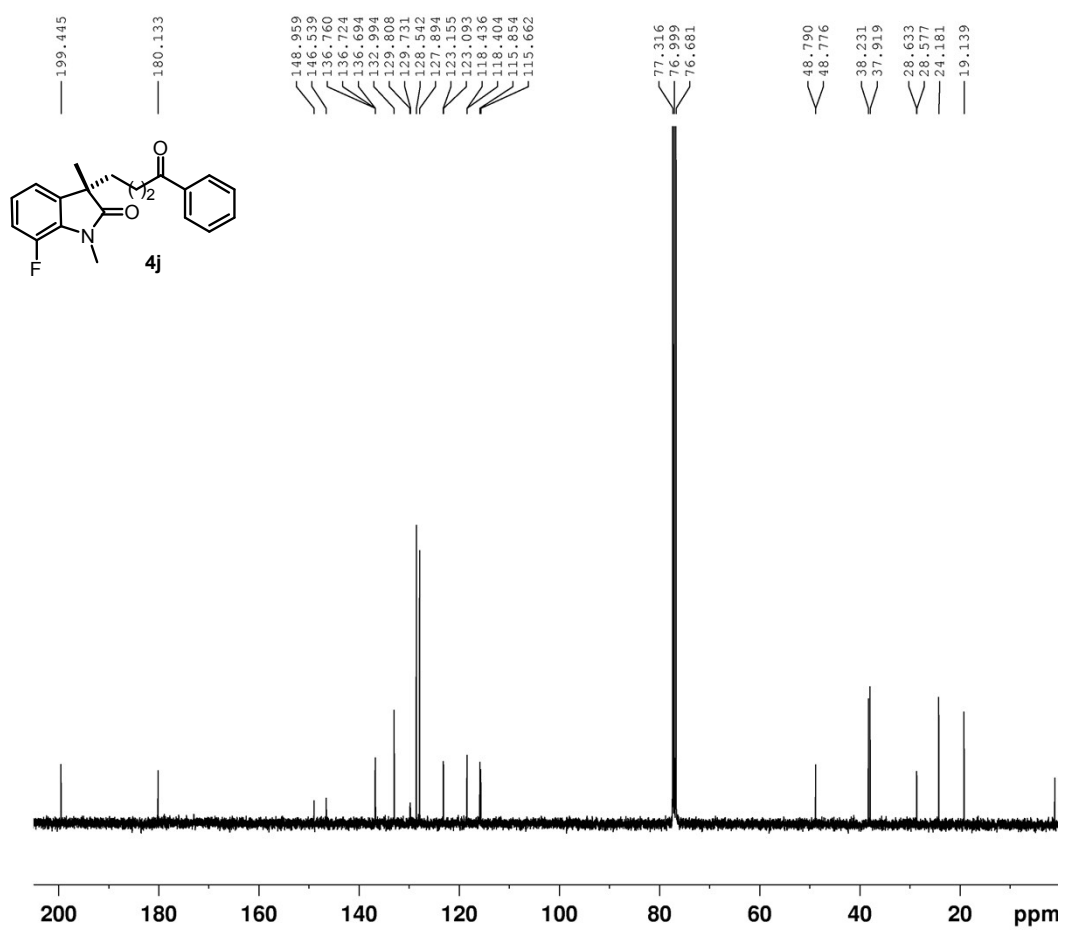

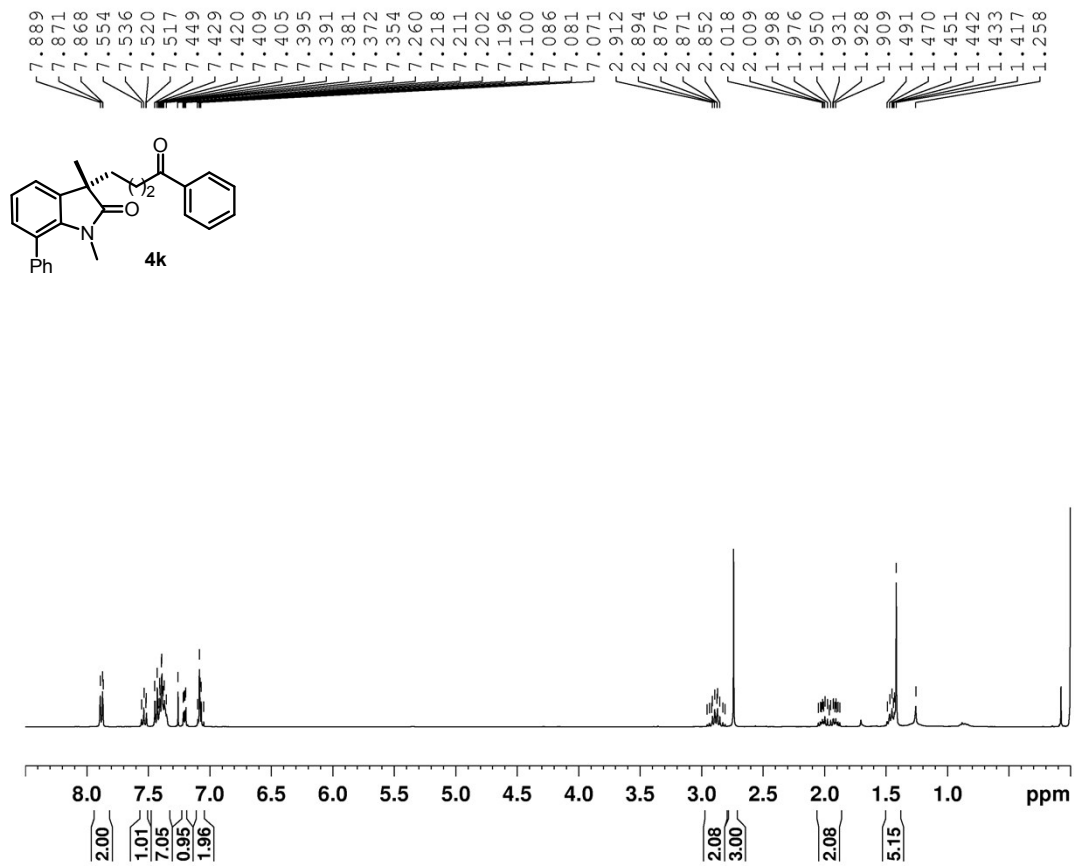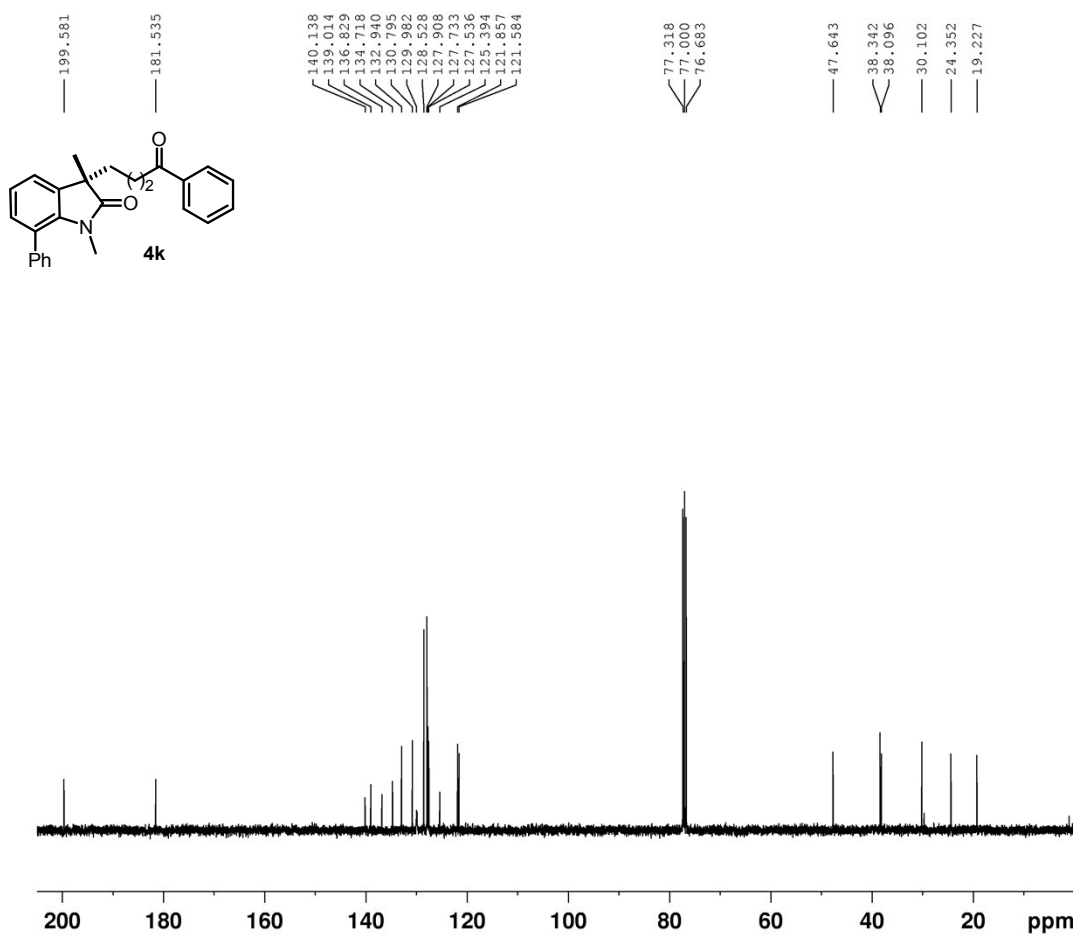

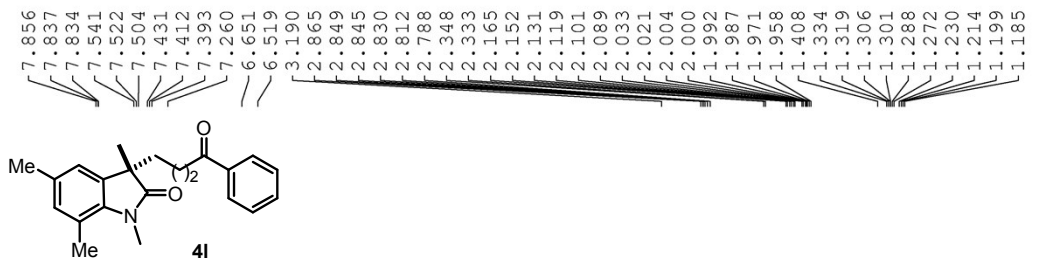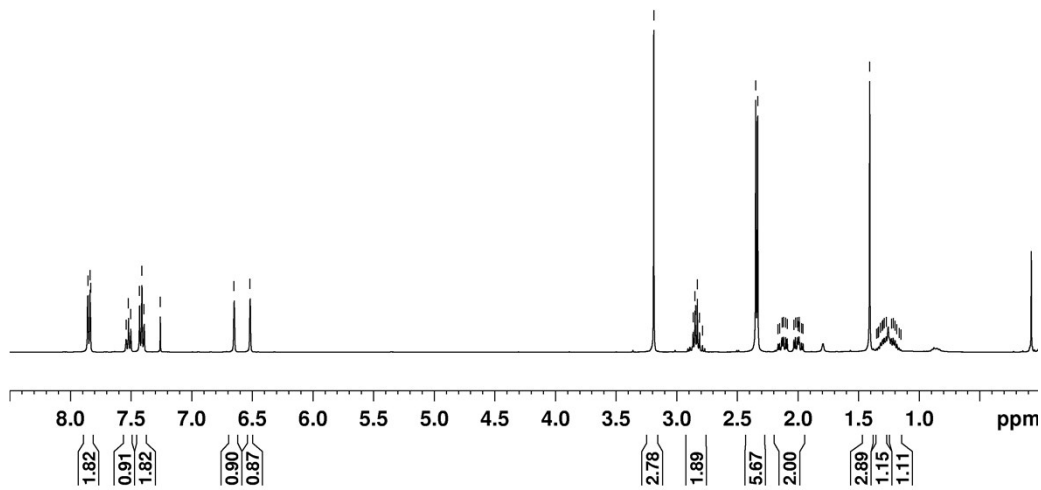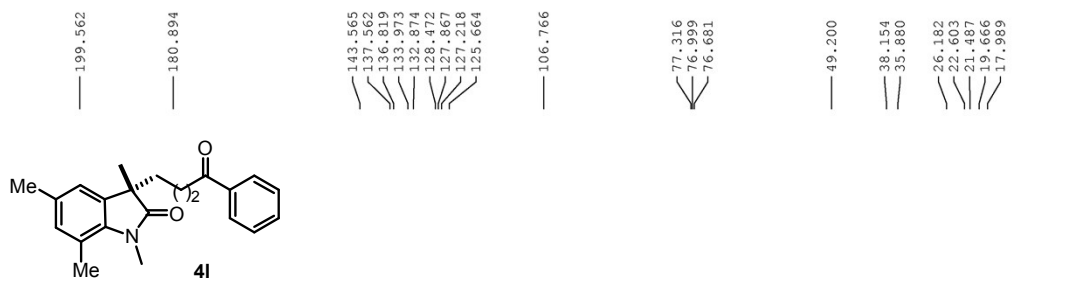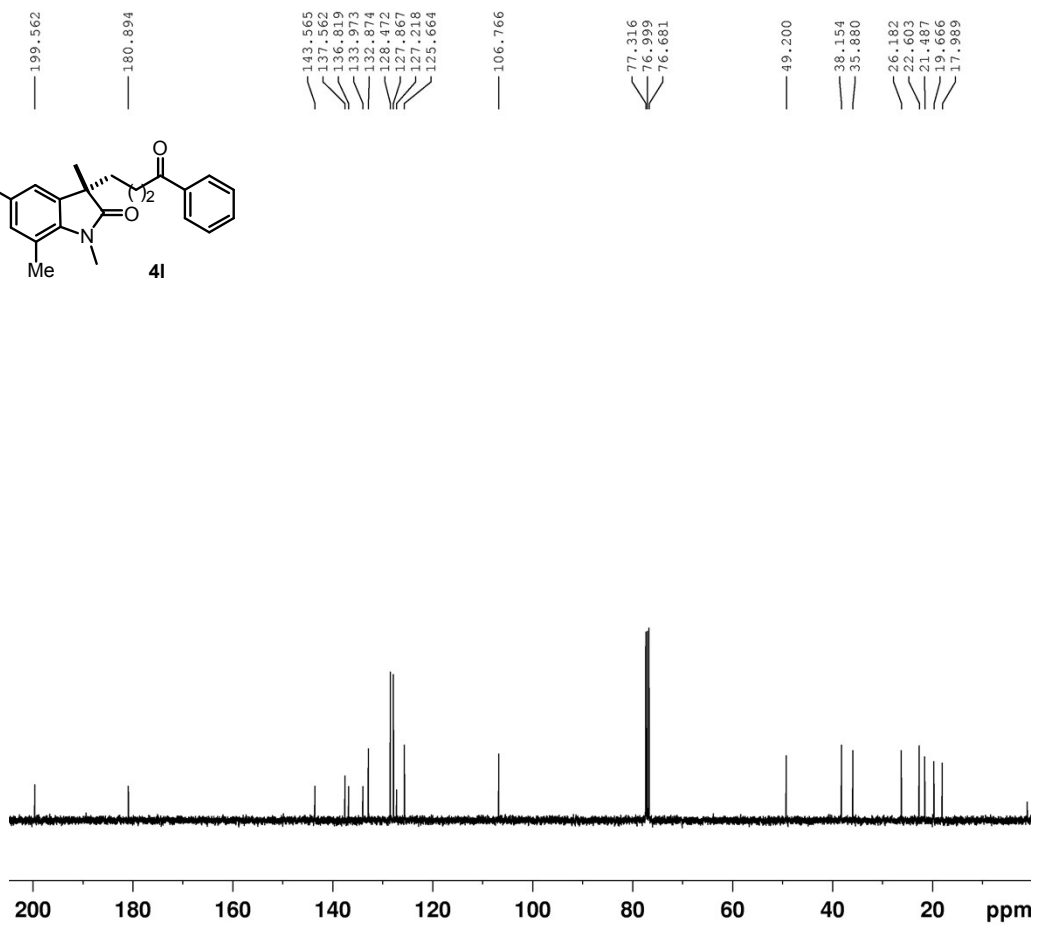

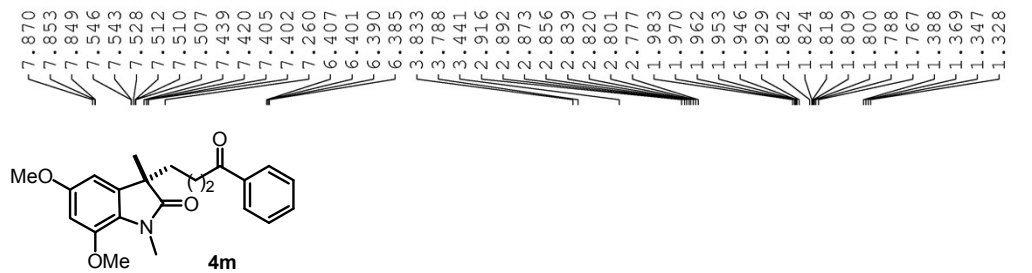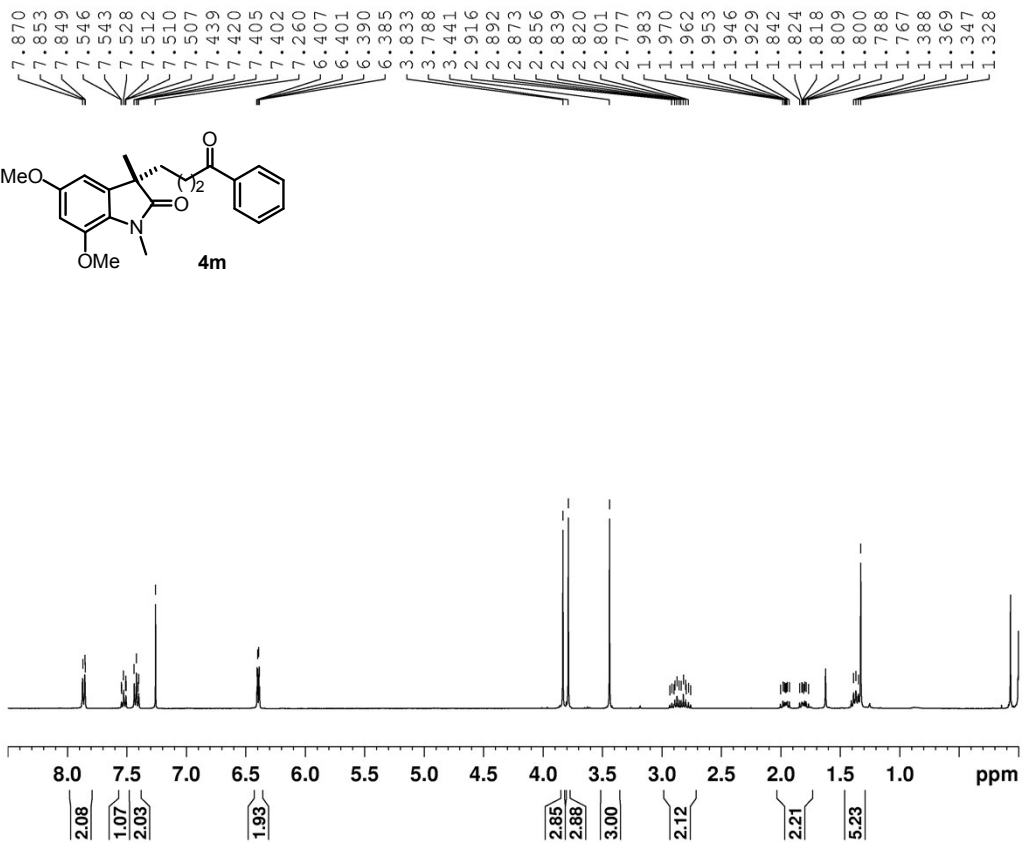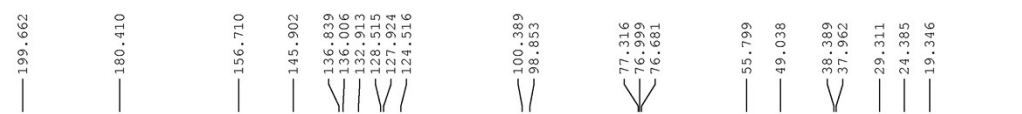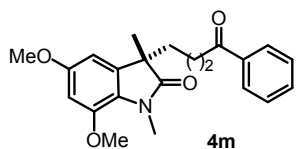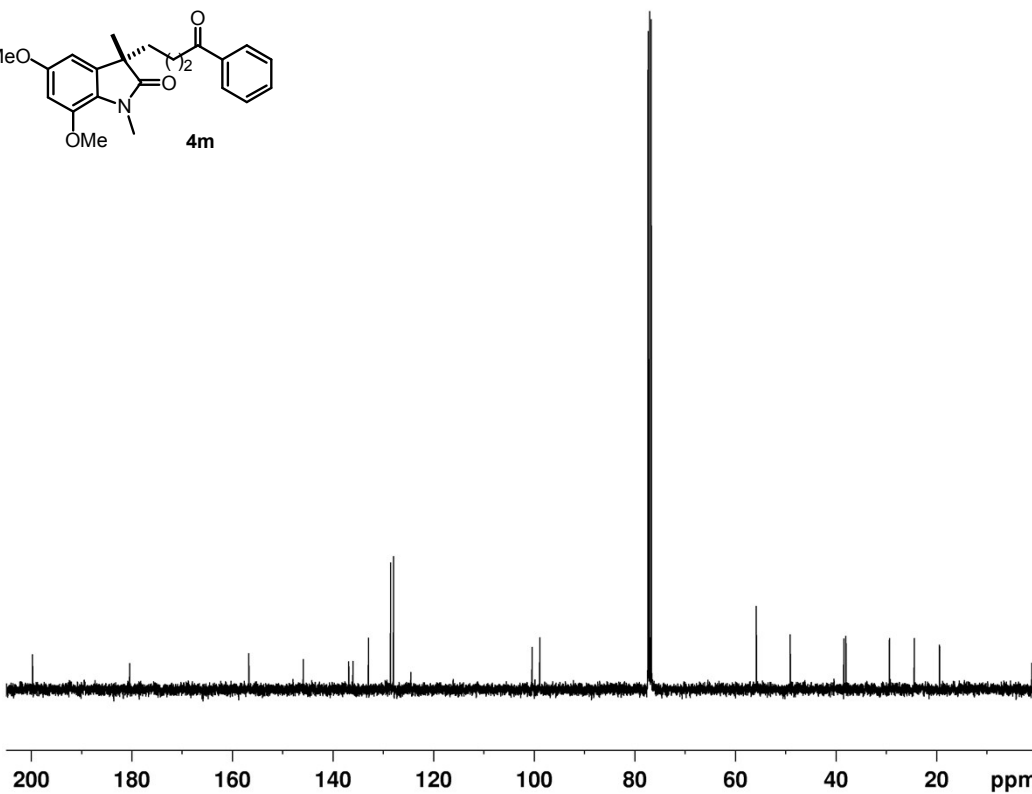

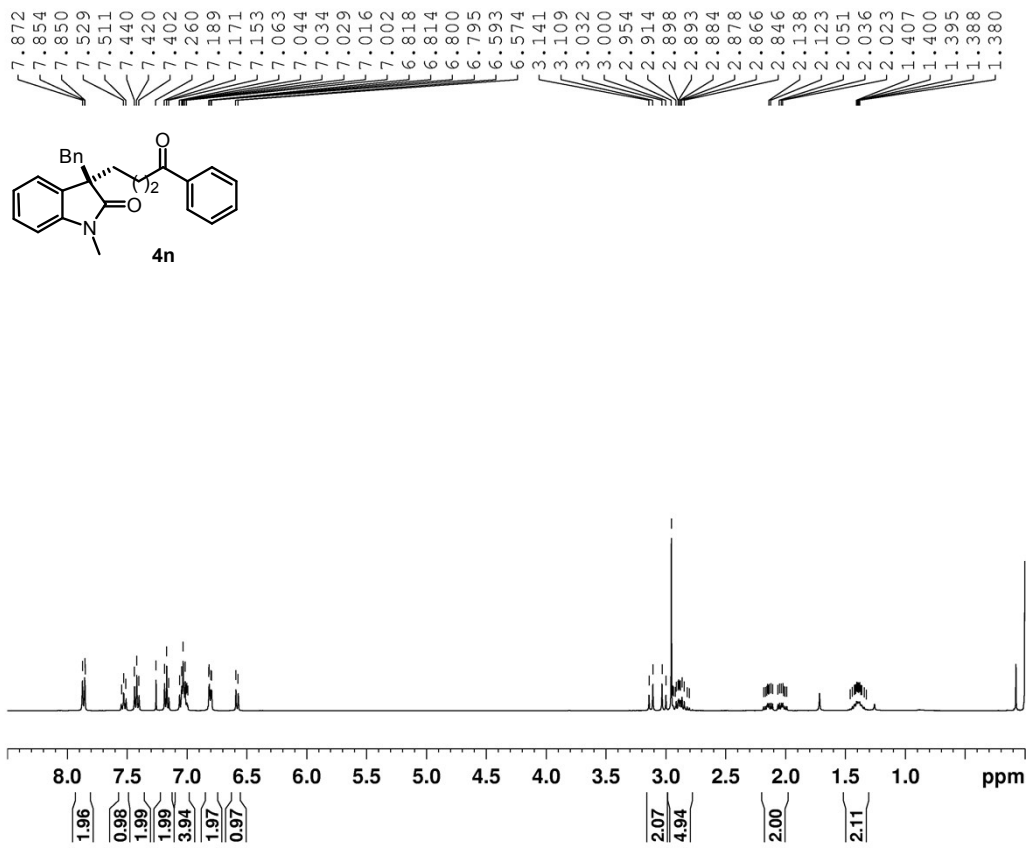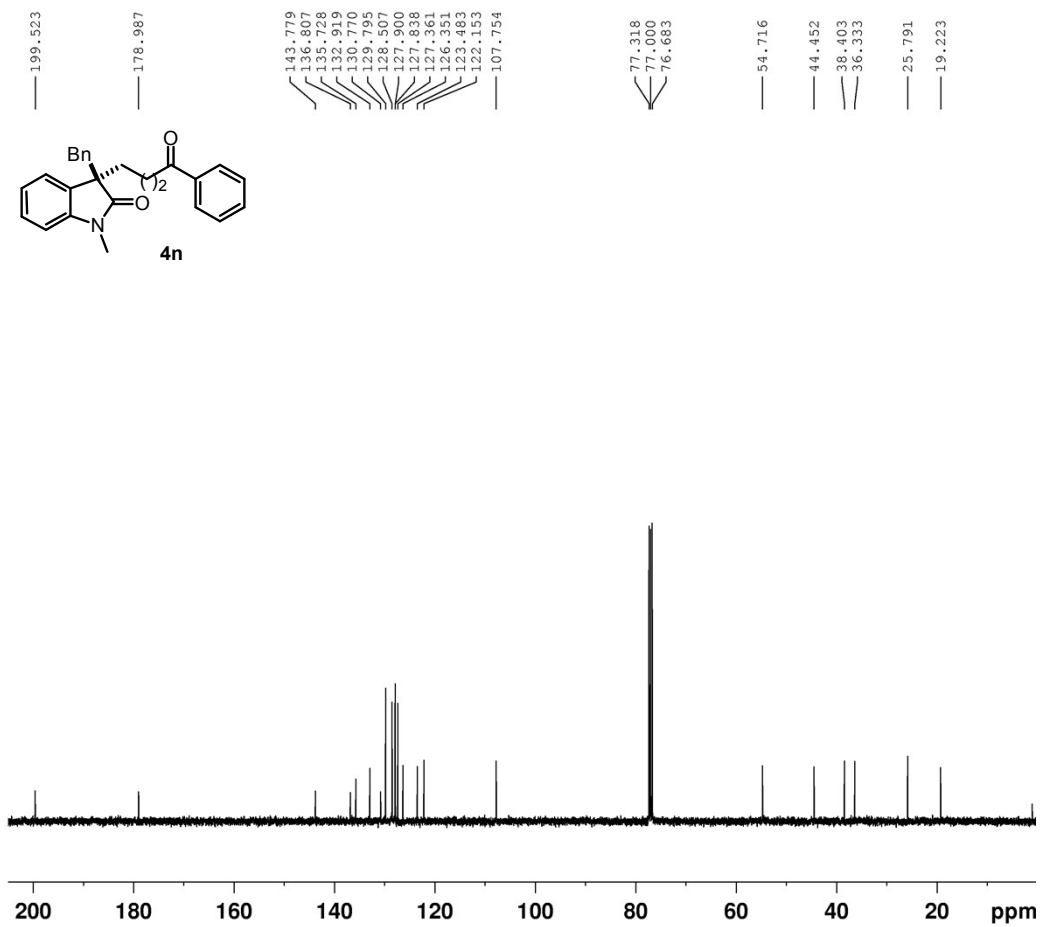

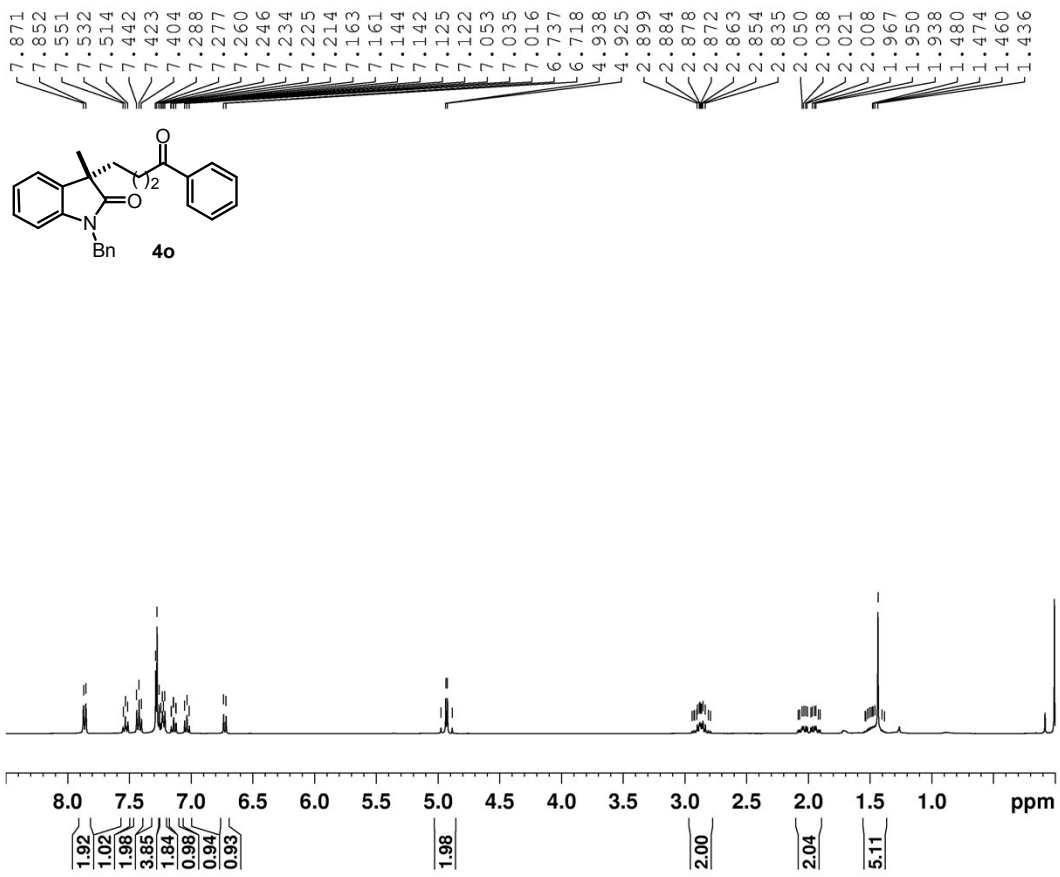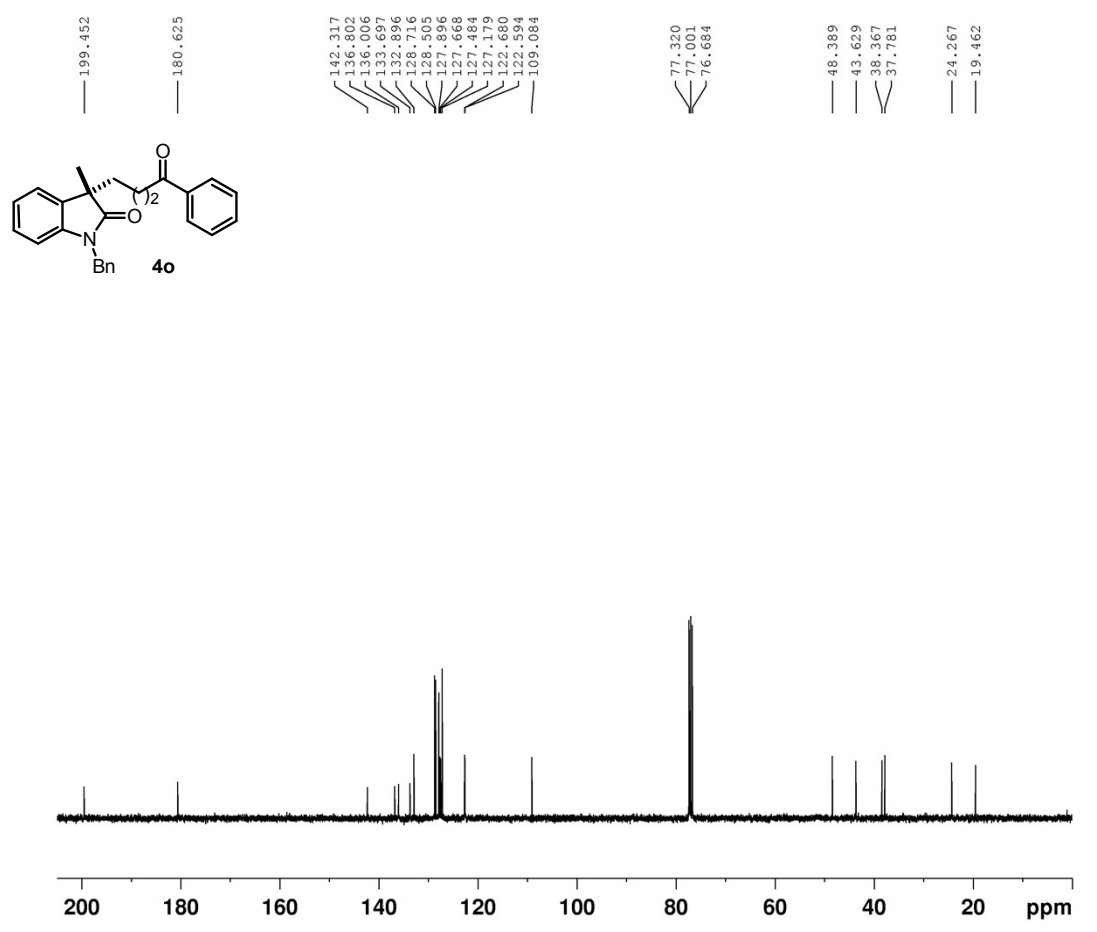

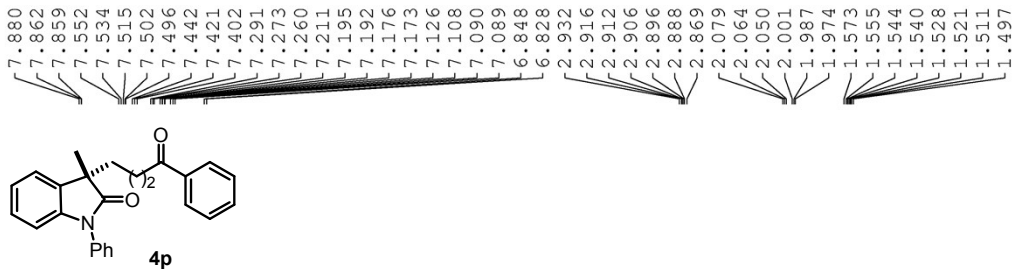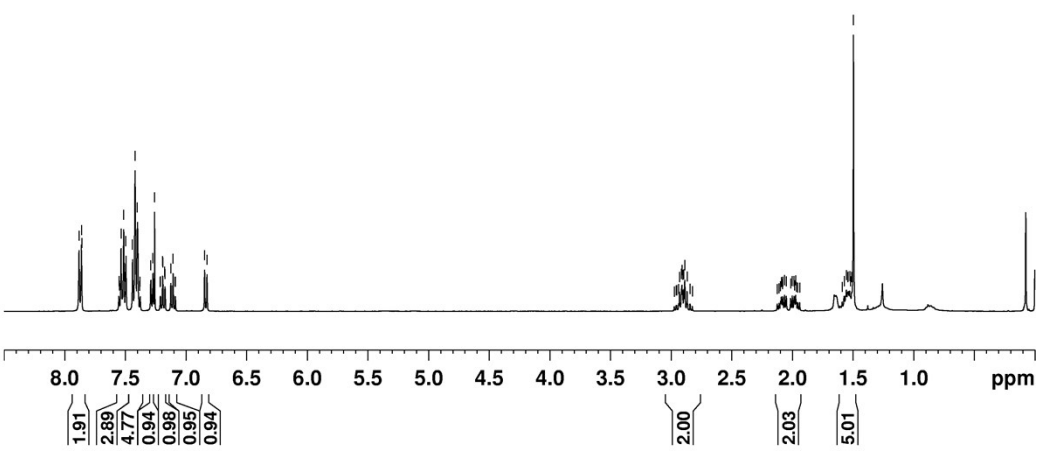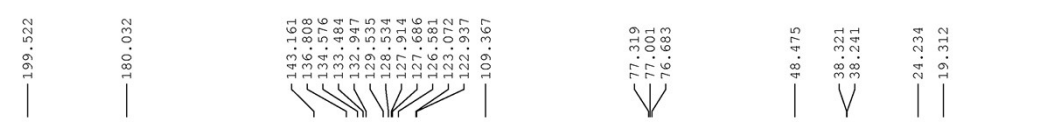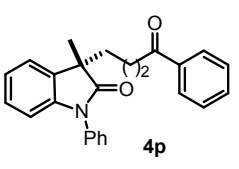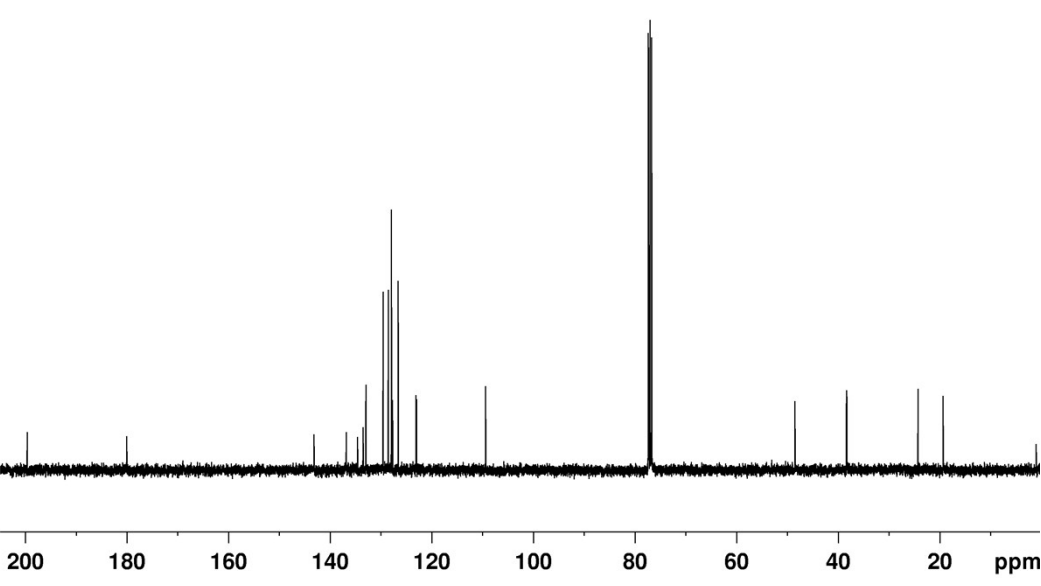



# <sup>1</sup>H NMR and <sup>13</sup>C NMR Spectra of Products 6

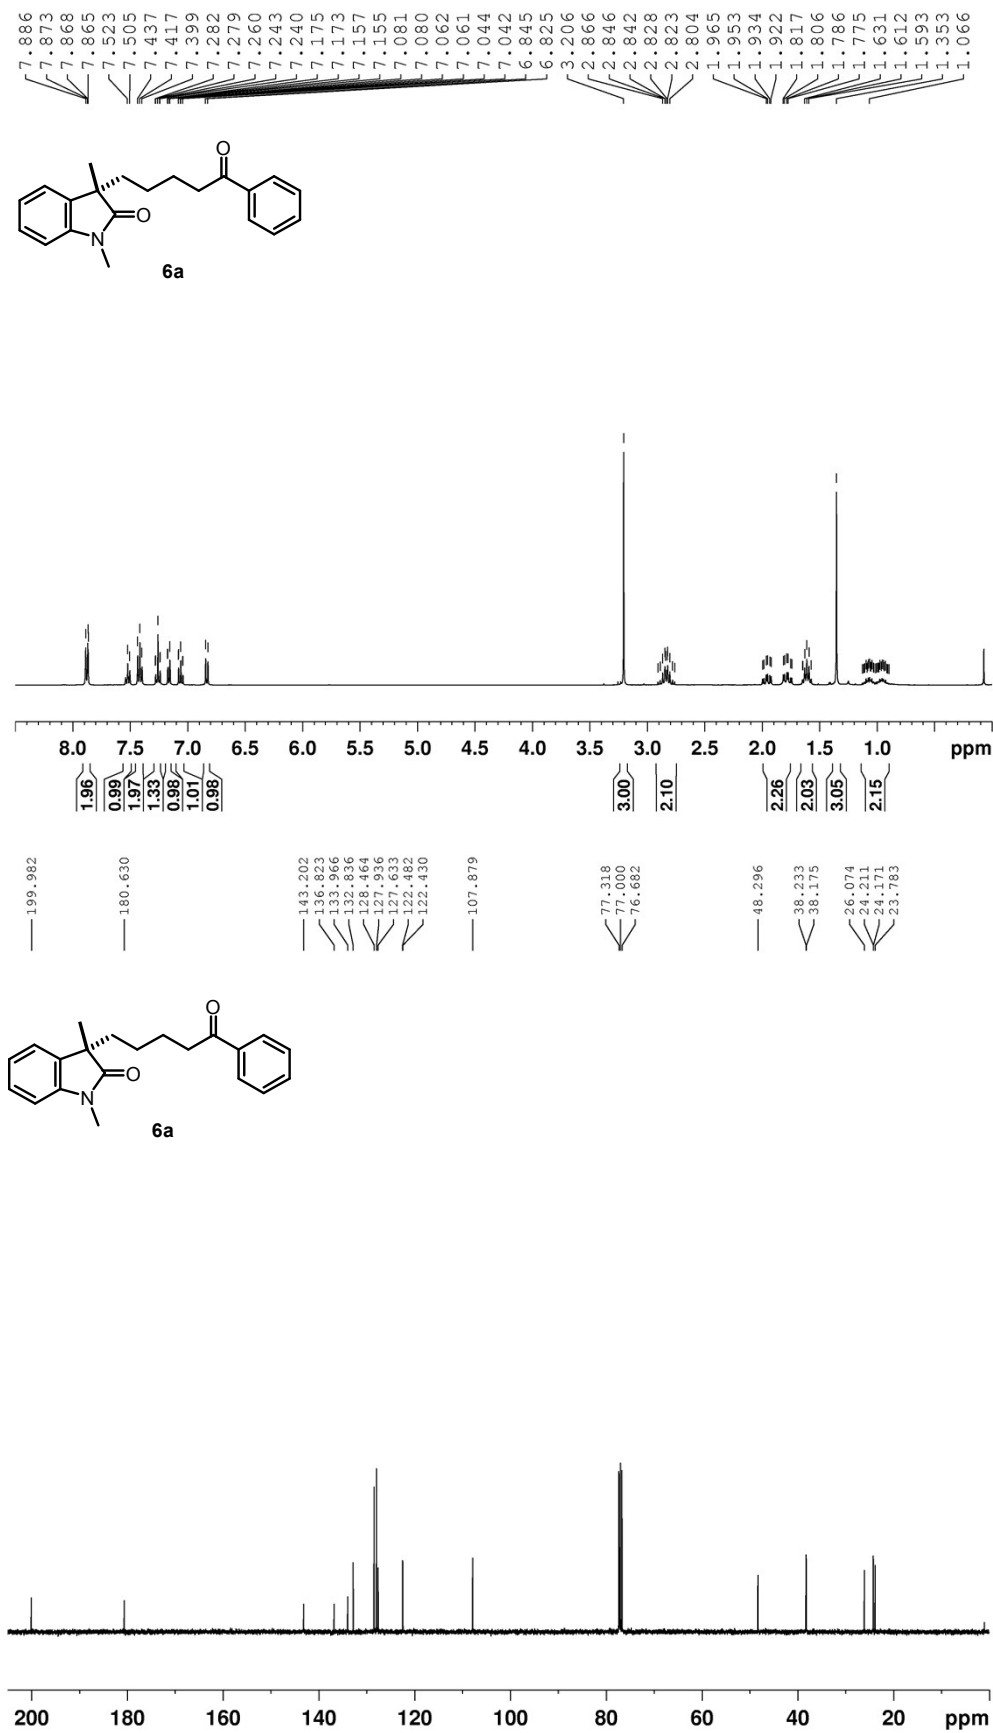

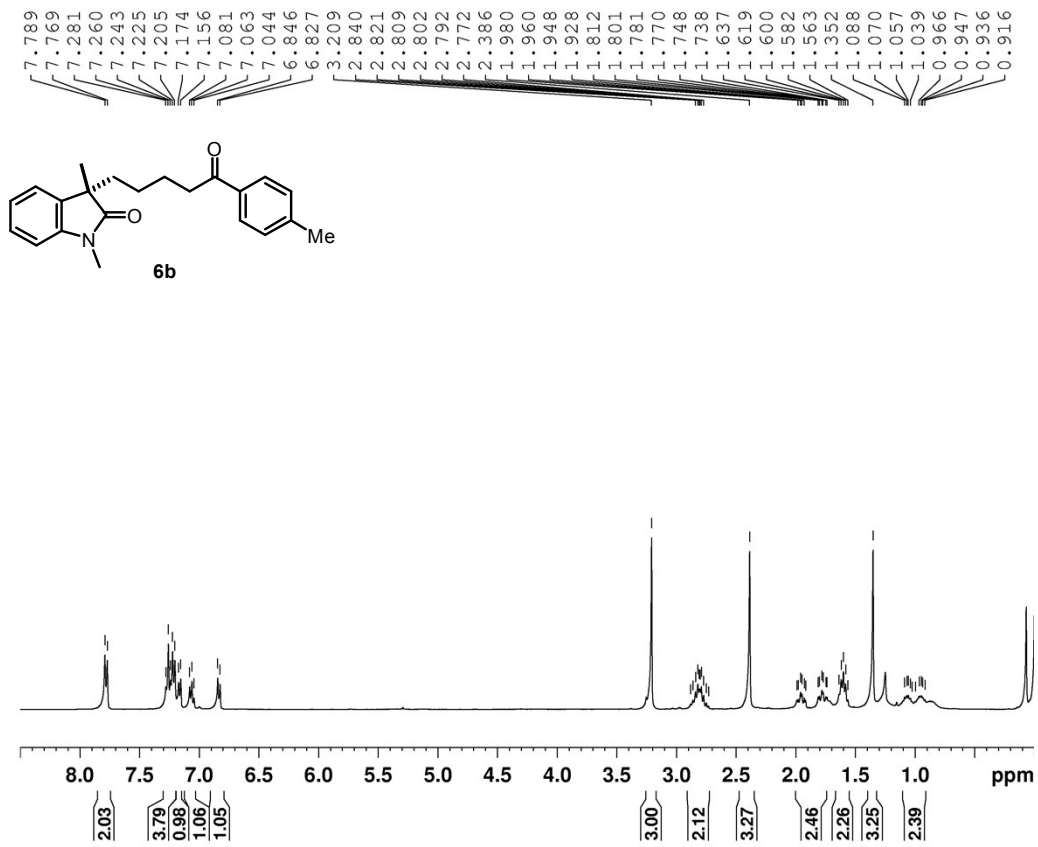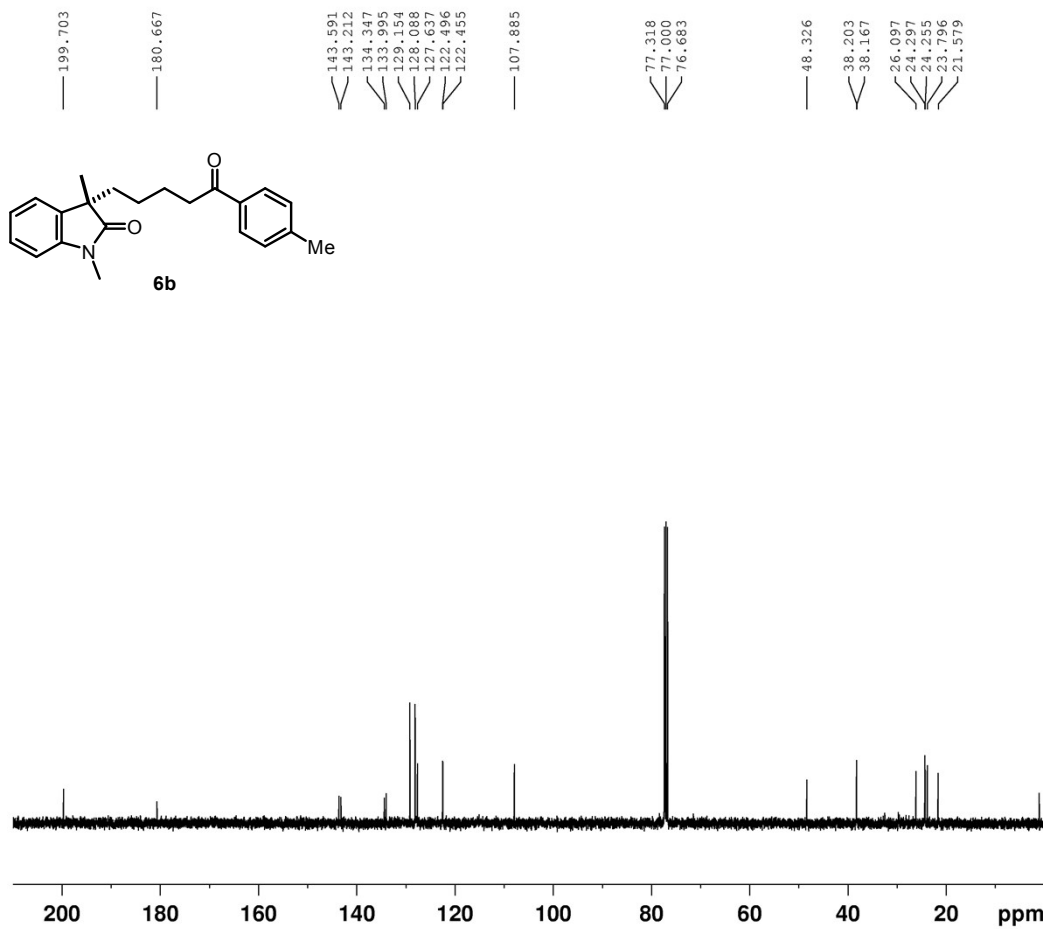

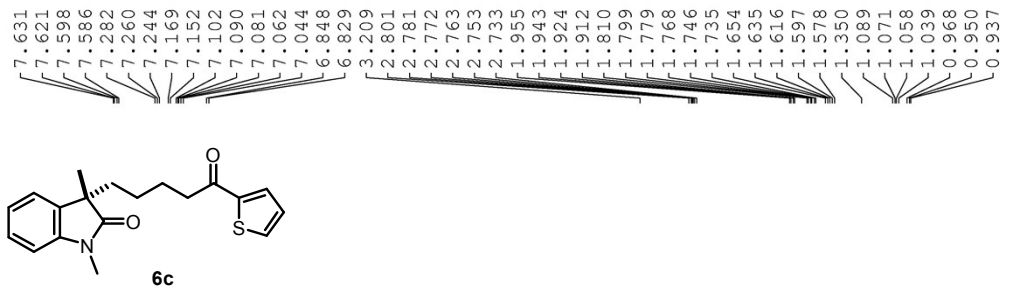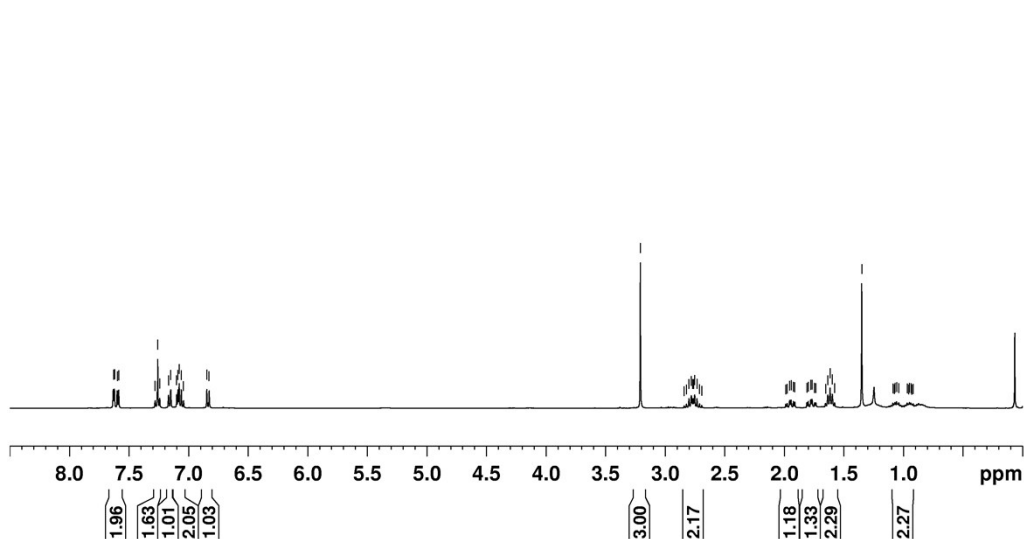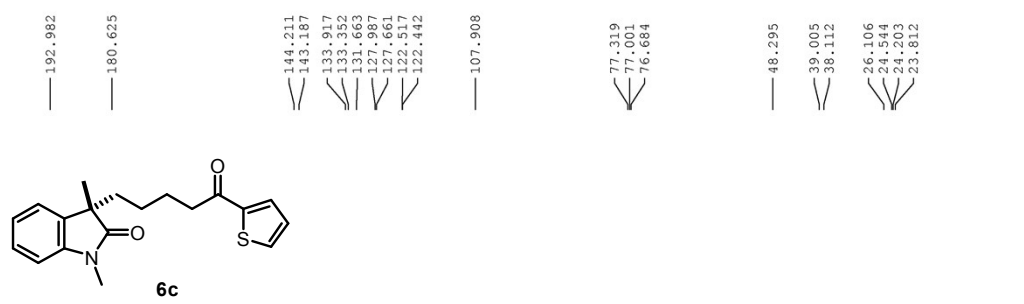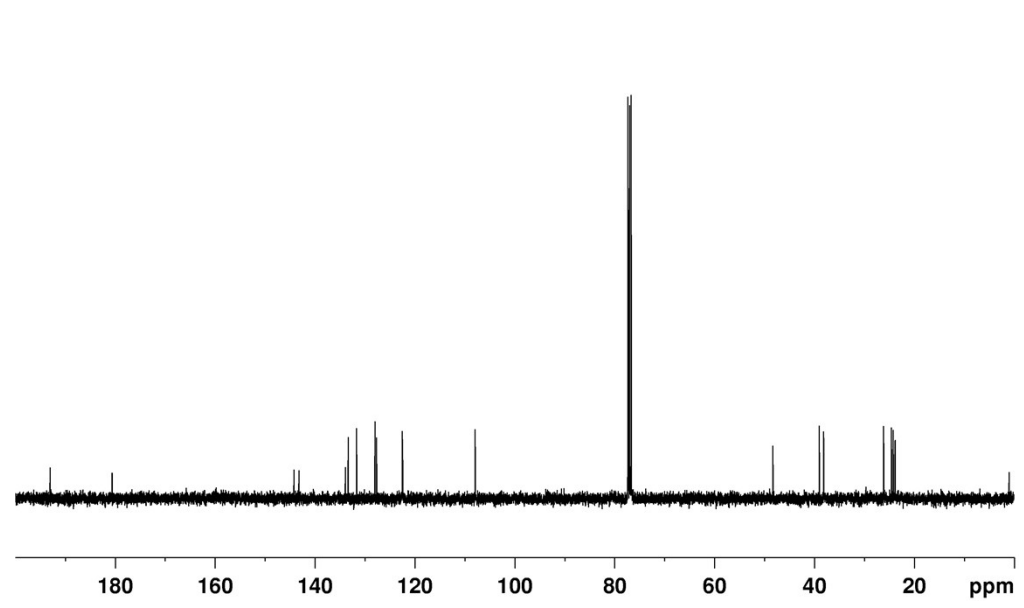

Supplement: c6ra03431d1.pdf [file c6ra03431d1.pdf]
